# Supplementary material for: Patient work from a context and time use perspective: a mixed-methods study protocol
Source: PubMed Central journal article supplement — BMJ Open. 2018 Dec 22;8(12):e022163. doi: 10.1136/bmjopen-2018-022163 (PMC6307620; doi:10.1136/bmjopen-2018-022163), 2018-12-22
Supplement: bmjopen-2018-022163.draft_revisions.pdf [file bmjopen-2018-022163.draft_revisions.pdf]

# BMJ Open

BMJ Open is committed to open peer review. As part of this commitment we make the peer review history of every article we publish publicly available.

When an article is published we post the peer reviewers' comments and the authors' responses online. We also post the versions of the paper that were used during peer review. These are the versions that the peer review comments apply to.

The versions of the paper that follow are the versions that were submitted during the peer review process. They are not the versions of record or the final published versions. They should not be cited or distributed as the published version of this manuscript.

BMJ Open is an open access journal and the full, final, typeset and author-corrected version of record of the manuscript is available on our site with no access controls, subscription charges or pay-per-view fees (<http://bmjopen.bmj.com>).

If you have any questions on BMJ Open's open peer review process please email [editorial.bmjopen@bmj.com](mailto:editorial.bmjopen@bmj.com)

# BMJ Open

## Patient Work from a Context and Time Use Perspective – A Mixed-Methods Study Protocol

|                               |                                                                                                                                                                                                                                                                                                                                                                                                                                                                                                                                                                                                                                                                                                                                                                                                                                                                                                                                                                                                                         |
|-------------------------------|-------------------------------------------------------------------------------------------------------------------------------------------------------------------------------------------------------------------------------------------------------------------------------------------------------------------------------------------------------------------------------------------------------------------------------------------------------------------------------------------------------------------------------------------------------------------------------------------------------------------------------------------------------------------------------------------------------------------------------------------------------------------------------------------------------------------------------------------------------------------------------------------------------------------------------------------------------------------------------------------------------------------------|
| Journal:                      | <i>BMJ Open</i>                                                                                                                                                                                                                                                                                                                                                                                                                                                                                                                                                                                                                                                                                                                                                                                                                                                                                                                                                                                                         |
| Manuscript ID                 | bmjopen-2018-022163                                                                                                                                                                                                                                                                                                                                                                                                                                                                                                                                                                                                                                                                                                                                                                                                                                                                                                                                                                                                     |
| Article Type:                 | Protocol                                                                                                                                                                                                                                                                                                                                                                                                                                                                                                                                                                                                                                                                                                                                                                                                                                                                                                                                                                                                                |
| Date Submitted by the Author: | 04-Feb-2018                                                                                                                                                                                                                                                                                                                                                                                                                                                                                                                                                                                                                                                                                                                                                                                                                                                                                                                                                                                                             |
| Complete List of Authors:     | <p>Yin, Kathleen; Macquarie University, Australian Institute of Health Innovation<br/> Harms, Teresa; Oxford Brookes University Department of Social Sciences, Centre for Time Use Research; University of Western Australia Business School<br/> Ho, Kenneth; Macquarie University, Faculty of Medical and Health Sciences<br/> Rapport, Frances ; Macquarie University, Australian Institute of Health Innovation<br/> Vagholkar, Sanjyot; Macquarie University, Faculty of Medical and Health Sciences<br/> Laranjo, Liliana ; Australian Institute of Health Innovation, Centre for Health Informatics<br/> Coiera, Enrico; Macquarie University, 5. Centre for Health Informatics, Australian Institute of Health Innovation, Faculty of Medicine and Health Sciences<br/> Gershuny, Jonathan; Oxford Brookes University Department of Social Sciences, Centre for Time Use Research<br/> Lau, Annie; Macquarie University, Australian Institute of Health Innovation, Faculty of Medicine and Health Sciences</p> |
| Keywords:                     | Patient work, Mixed-methods study, Body-worn cameras, Time-use diary, Passive data collection, Burden of disease                                                                                                                                                                                                                                                                                                                                                                                                                                                                                                                                                                                                                                                                                                                                                                                                                                                                                                        |
|                               |                                                                                                                                                                                                                                                                                                                                                                                                                                                                                                                                                                                                                                                                                                                                                                                                                                                                                                                                                                                                                         |

SCHOLARONE™  
Manuscripts

1  
2  
3 **Patient Work from a Context and Time Use Perspective – A Mixed-Methods Study**

4  
5 **Protocol**

6  
7 Kathleen Yin<sup>1</sup>, Teresa Harms<sup>2,3</sup>, Kenneth Ho<sup>4</sup>, Frances Rapport<sup>1</sup>, Sanjyot Vagholkar<sup>4</sup>, Liliana  
8  
9 Laranjo<sup>1</sup>, Enrico Coiera<sup>1</sup>, Jonathan Gershuny<sup>2</sup>, Annie Y. S. Lau<sup>1</sup>

10  
11  
12  
13 Corresponding author:

14  
15 Kathleen Yin

16  
17 Australian Institute of Health Innovation

18  
19 Macquarie University, 75 Talavera Rd, North Ryde NSW 2113

20  
21 Email: [kathleen.yin@mq.edu.au](mailto:kathleen.yin@mq.edu.au)

22  
23 Telephone: +61 2 9850 2477

24  
25  
26  
27  
28 1. Centre for Health Informatics, Australian Institute of Health Innovation, Macquarie  
29  
30 University, Sydney, Australia.

31  
32  
33 2. Centre for Time Use Research, Department of Sociology, University of Oxford, Oxford,  
34  
35 Oxfordshire, United Kingdom.

36  
37 3. Planning and Transport Research Centre, Business School, University of Western  
38  
39 Australia, Perth, Australia.

40  
41 4. Faculty of Medical and Health Sciences, Macquarie University, Sydney, Australia.

42  
43  
44  
45  
46 Word count: 3799

**Abstract:**

Introduction: 'Patient work', a concept that encompasses patients' health-related behaviours and their contexts, forms the basis of patient-centred holistic healthcare. Passive observation, combined with in-depth interviews about health behaviours and motivations, has the potential to yield comprehensive insights about patient work. The purpose of our study is to pilot a novel research methodology that combines body-worn cameras, self-report time-use diaries, activity trackers, interviews, and questionnaires to capture the full range of patient work experienced by participants living with type 2 diabetes with chronic co-morbidities, potentially extending to populations with other chronic health conditions.

Methods and analysis: This mixed-methods study involves a pre-study interview, a 24-hour period during which participants wear a passive data collection instrument (body-worn camera) and complete the time diary, and a post-study 'reconstruction' interview. Adult participants living with type 2 diabetes with at least one chronic co-morbidity will be recruited using purposive sampling to obtain a balanced gender ratio, as well as equal numbers of participants using insulin versus those using only oral medications. Interviews will be analysed using thematic analysis to identify any recurring themes regarding health-related activities, and data captured by digital devices will be used to identify the duration, time, context, and patterns of observed health-related behaviours.

Ethics and dissemination: The study was approved by the Macquarie University Human Research Ethics Committee for Medical Sciences on 6th September 2017 (Reference Number 5201700718). Participants will carry a wallet-sized card that explains the purpose of the study to third parties, and can remove the body-worn camera at any stage. Before the post-study interview begins, participants will view the camera images in private and to delete any unwanted (or all) images. Should any images be used in future publications or presentations, identifying features such as human faces and names will be obscured.



### Strengths and limitations of this study

- This is the first study that employs a mixed-method design using passive digital observation equipment, self-report time-use diaries, complemented with interviews and questionnaires, to document patient work.
- Using the body-worn camera may diminish the observer effect caused by having researchers observe participants in a private setting, as well as reducing the participant burden of having researchers in their homes for prolonged periods of time.
- The self-report diary complements data from the passive device by creating a holistic view of patient work carried out by the participant.
- The study is limited by the 24-hour data collection period, which may not include patient work that occurs frequently, but outside the observation period.

### Keywords

Patient work; Mixed-method study; Body-worn cameras; Time-use diary; Passive data collection devices; Interviews; Burden of disease.

## INTRODUCTION

For better or worse, living with chronic diseases changes people's lives. Following diagnosis or medical interventions, patients and their families often need to adjust their daily routines to accommodate their health condition, such as making time to administer medications, visit medical professionals, or prepare special meals.<sup>1-4</sup> The concept of 'patient work', derived from health ergonomics, describes the physical work conducted by the patient to manage their health, as well as the holistic sum of contexts (physical, social, mental, and organisational) that influence the work conducted.<sup>5-7</sup>

When integrated poorly into people's lives, patient work has the potential to generate extra stress, contributing to non-compliance to medical regimens and negatively impacting on patient health outcomes.<sup>8,9</sup> Currently, many health interventions are implemented without considering the *context* of a patient's life. Treatment and self-management recommendations, whilst given with good will, do not acknowledge the specificities of a patient's daily routine, household characteristics, physical environment, social obligations and roles, as well as internal perceptions, beliefs, and attitudes towards health.<sup>10-13</sup>

Digitally-distributed health interventions specifically suffer from poor integration into patients' lives, as studies involving digital interventions (such as mobile applications) show significantly higher dropout rates than traditional, drug- or surgery-based trials, with some digital health intervention studies having retention rates as low as 1% by the end of the study period.<sup>10,13-15</sup> Interestingly, participants in digital health studies report the devices' lack of effective integration and 'fit' into their daily lives as reasons for discontinuation.<sup>16</sup> This suggests that clinicians and digital health advocates need to understand the impact of health

1  
2  
3 interventions within the context of patients' lives, as well as the internal, subjective thought  
4  
5 processes that underpin patients' attitudes towards health-related changes.<sup>17-19</sup>  
6  
7

### 8 9 **Patient work research**

10  
11 Previous patient work research has relied heavily on self-report methods (e.g. interviews,<sup>17 20</sup>)  
12  
13 direct observation (e.g. researchers being present continuously in participants' homes and  
14  
15 observing their behaviours), or theoretical modelling approaches (e.g. analysing macro-  
16  
17 ergonomic elements<sup>21 22</sup>). These data collection methods have been limited by the level of  
18  
19 reliability in self-report data (e.g. social desirability effect) and the degree of discomfort  
20  
21 participants experience during direct observation periods, including the high probability of  
22  
23 observer effect.<sup>23</sup> These methodological limitations are therefore unlikely to capture the  
24  
25 'natural' routines and behavioural contexts of the participant.  
26  
27

28  
29  
30  
31 In this study, we aim to address this methodological gap by capturing a wide range of health-  
32  
33 related activities and contexts in people's home environments. We will use a mixed-methods  
34  
35 approach of unobtrusive passive observation via an automated digital device (the body-worn  
36  
37 camera), as well as patient self-reports. To this end, our study has adapted the protocols used  
38  
39 and validated by Kelly et al.,<sup>24 25</sup> which were employed in research projects conducted by the  
40  
41 Centre for Time Use Research (CTUR) and the British Heart Foundation Centre on  
42  
43 Population Approaches for Non-Communicable Disease Prevention, both at The University  
44  
45 of Oxford. The protocol utilises a unique combination of body-worn cameras, accelerometers  
46  
47 (Axivity AX3), self-report time-use diaries, interviews, and questionnaires to obtain holistic  
48  
49 data regarding the participants' physical activities and contexts – techniques which have been  
50  
51 applied across population groups to study human behaviour.<sup>24 26-29</sup> It is anticipated that  
52  
53  
54  
55  
56  
57

1  
2  
3 applying such a mixed-methods methodology in a healthcare setting would enable a more  
4 comprehensive investigation and understanding of patient work.  
5  
6  
7

### 8 9 **Type 2 Diabetes and Other Co-morbidities**

10  
11 To validate using this mixed-methods research protocol, we will focus on the daily lives of  
12 people with type 2 diabetes, with at least one chronic co-morbidity. The nature of type 2  
13 diabetes, which impacts the entire metabolic process, means that patients need to carry out a  
14 variety of different activities to control their diabetes. These may include diet modification,<sup>30</sup>  
15 weight management,<sup>31</sup> exercise,<sup>32</sup> complication prevention,<sup>33</sup> blood glucose tests,<sup>34</sup> and  
16 insulin injections.<sup>35</sup> Metabolically related co-morbidities such as high cholesterol,  
17 cardiovascular diseases, and kidney malfunctions<sup>36 37</sup> are frequently present in people living  
18 with type 2 diabetes, which warrants the inclusion of co-morbidities to reflect the true extent  
19 of health behaviours. Co-morbidity is frequently a criterion for exclusion in research studies,  
20 suggesting that our study will give rare insights into the lives of people living with type 2  
21 diabetes, as well as a greater understanding of patient work in patients with chronic co-  
22 morbid conditions.  
23  
24  
25  
26  
27  
28  
29  
30  
31  
32  
33  
34  
35  
36  
37  
38  
39  
40  
41  
42  
43  
44  
45  
46  
47  
48  
49

50  
51 This protocol paper therefore aims to describe a novel research methodology – body-worn  
52 cameras, self-reports, and time-use diaries – as an approach to studying patient work in  
53 people living with type 2 diabetes and co-morbidities, potentially extending to populations  
54 with other chronic health conditions.  
55  
56  
57

### 58 **AIMS**

59  
60 The aim of this paper is to test and validate a novel cross-disciplinary mixed-methods  
approach in the investigation of patient work conducted by people living with type 2 diabetes

1  
2  
3 and at least one chronic co-morbidity. The approach will use passive a data collection  
4  
5 instrument to allow objective measurement, which will be complemented by subjective  
6  
7 reporting. Data collection will involve self-reported data (semi-structured interviews and  
8  
9 time-use diaries) as well as objective measurements (questionnaires, photos, and video  
10  
11 footage), as well as striving to minimise participant burden,  
12  
13  
14

## 15 **METHODS**

16  
17 The study has been approved by the Macquarie University Human Research Ethics  
18  
19 Committee, approval number 5201700718.  
20  
21  
22  
23

### 24 **Sample and recruitment**

25  
26 Eligible participants are: (1) adults aged 18 years and older; (2) consenting adults who can  
27  
28 speak, write and read English; (3) have been diagnosed with type 2 diabetes and at least one  
29  
30 chronic comorbidity; (4) willing to complete a time-use diary for one day; and (5) agree to  
31  
32 wear the Edesix body-worn camera for one day. Exclusion criteria include adults who  
33  
34 currently are experiencing: (1) pregnancy; (2) critical illness; (3) end-stage disease; (4)  
35  
36 dementia; (5) severe mental disorders that prevent them from giving informed consent and;  
37  
38 (6) dependence on others for basic activities of daily living, such as dressing and eating.  
39  
40

41 Participants will receive \$60 in Australian Dollars of shopping vouchers as remuneration.  
42  
43  
44  
45

46 Up to 40 participants will be recruited with balanced numbers of participants using only oral  
47  
48 medication and those using insulin to control diabetes, in order to capture a full range of  
49  
50 patient work at various degrees of diabetes. The number of participants chosen was informed  
51  
52 by previous qualitative studies in the field of patient work. This sample size also offers the  
53  
54 power to achieve rich and nuanced data, while keeping in mind the complexities and the  
55  
56  
57

1  
2  
3 different time intervals between data points for each data capture tool.<sup>6 17 20</sup> Previous patient  
4  
5 work studies analysed 60-80 hours of interview or direct observational data per study. This  
6  
7 study will capture approximately 2 hours of interview data and 5000 images per participant.  
8  
9 Therefore, a sample size between 30 and 40 participants would be comparable to the depth of  
10  
11 data captured by previous studies.  
12  
13

14  
15 Recruitment, which commenced in September 2017, will continue to be carried out via the  
16  
17 Macquarie University general practice clinic, and via general practitioners and  
18  
19 endocrinologists in the surrounding suburbs. These medical practitioners manage a large and  
20  
21 diverse patient base, stretching across the northern Sydney suburbs and covering a wide  
22  
23 range of cultural and economically diverse population groups.  
24  
25  
26

27  
28 Promotional flyers will be distributed to the medical practices and will include general study  
29  
30 information and a link to the study website, where potential participants will be able to check  
31  
32 their eligibility criteria ([www.tinyurl.com/patientswork](http://www.tinyurl.com/patientswork)). The study will also be promoted on  
33  
34 the Macquarie University Facebook page and via an emailed newsletter associated with the  
35  
36 University. Healthcare practitioners will not be notified if their patients have agreed to  
37  
38 participate in the study to uphold patient anonymity and confidentiality and reduce the  
39  
40 possibility of behavioural change.  
41  
42  
43

44  
45 General practitioners and endocrinologists involved in recruitment will also send invitation  
46  
47 letters to eligible patients, with a study reply slip included in the envelope. Patients interested  
48  
49 in participating will be asked to return the pre-paid reply slip with their contact details so that  
50  
51 a member of the research team can contact them.  
52  
53  
54

1  
2  
3 For initial contact, the research team will telephone potential participants, confirm the  
4 participants' understanding of the study eligibility criteria, assure confidentiality and  
5 anonymity during the data-collection phase of the study, and address any questions or  
6 concerns. This approach will minimise participant contact with the research team and  
7 clinicians during recruitment, and mitigate coercion during recruitment. While self-  
8 nominated participants may be subject to participation bias, high completion rates and  
9 compliance are likely.  
10  
11  
12  
13  
14  
15  
16  
17  
18  
19

20 Participants will be given the Participant Information Booklet (Supplementary 1: Information  
21 booklet) during a pre-study, individualised briefing session, which involves an interview that  
22 will take approximately one hour. Following the pre-study session, data will be collected  
23 from participants over the course of 24 hours. Immediately following data capture period,  
24 participants will be invited to a post-study session with a reconstruction interview that will  
25 take 30 to 40 minutes (Figure 1).  
26  
27  
28  
29  
30  
31  
32  
33  
34

### 35 **Data collection instruments and equipment**

#### 36 **Time-Use Diary**

37  
38 The self-report time use diary is a validated tool.<sup>24</sup> The diary that will be used in this study is  
39 the Harmonised European Time Use Diary<sup>38</sup> (UK version) originally developed by Eurostat  
40 and used by 25 countries for national time-use studies. Participants will complete the diary in  
41 their own words over one 24-hour period. The diary is divided into 10-minute intervals and  
42 participants record: (1) the main/primary activity in which they were engaging; (2) other  
43 (secondary/simultaneous) activities that were occurring at the same time; (3) their location  
44 (e.g. home, clinic, shops) or if travelling, the mode of transport; (4) who they were with or  
45 whether they were alone; (5) whether they were using digital equipment (e.g. mobile phone,  
46  
47  
48  
49  
50  
51  
52  
53  
54  
55  
56  
57  
58  
59  
60

1  
2  
3 computer); and (6) how much they enjoyed the activity (Supplementary 2: Time-Use Diary).

4  
5 As data from the diary is self-reported, the diary can be used to complement the objective  
6  
7 activity data collected via the body-worn camera.  
8  
9

## 10 11 Photos

12  
13 With permission from the participant, photos of the participant's medications, medical  
14  
15 devices, and their home surroundings will be taken to inform the researchers about the  
16  
17 participant's physical environment. Should the participant reside in a physical environment  
18  
19 that can affect their healthcare (e.g. a house with stairs with a risk for falls, medications  
20  
21 placed in locations difficult to reach), these issues will be noted and taken into consideration  
22  
23 in the context of patient work. Participants will be alerted should an immediate and  
24  
25 significant risk be identified.  
26  
27  
28  
29  
30

## 31 Body-Worn Camera

32  
33 The body-worn camera (Edesix VB-300, Edinburgh) will automatically record silent  
34  
35 continuous video footage. It can be attached to clothing and/or worn on a lanyard. The  
36  
37 camera captures data regarding the daily activities in which the participant is engaged.  
38  
39  
40

## 41 Questionnaires

42  
43 Three questionnaires will be administered during the study. In the pre-study session, a basic  
44  
45 demographic questionnaire will be administered to obtain information about the participant's  
46  
47 age, gender, health conditions, length of time since diagnosis, list of medications taken, and  
48  
49 employment status. The questionnaire takes about 10 minutes to complete (Supplementary 3:  
50  
51 Demographic Questionnaire).  
52  
53  
54  
55  
56  
57  
58  
59  
60



1  
2  
3 A second questionnaire, the Multimorbidity Illness Perceptions Scale,<sup>39</sup> will also be  
4  
5 administered in the pre-study session. The scale has been validated statistically as a measure  
6  
7 of the burden of co-morbidity. It was developed to capture the perception of patients with co-  
8  
9 morbidities about their health, including the emotional effects of the conditions, treatment  
10  
11 burden, prioritisations between conditions, restriction of activities resulting from their health  
12  
13 conditions, and perceived causal links between health conditions.<sup>39</sup> The Scale takes  
14  
15 approximately 5 minutes to complete (Supplementary 4: Multimorbidity Illness Perceptions  
16  
17 Scale).

18  
19  
20  
21  
22 Finally, a participant experience survey will be administered during the post-study session to  
23  
24 assess the methodology employed, using the participant's feedback and experience regarding  
25  
26 the time-use diary and body-worn camera. The participant will be asked to provide feedback  
27  
28 regarding any issues they experienced while wearing the digital device, the reaction of other  
29  
30 people towards the device, and whether they felt the device involved too much work. This is  
31  
32 estimated to take approximately 10 minutes (Supplementary 5: Participant Experience  
33  
34 Survey).

### 35 36 37 38 39 **Pre-study session**

40  
41 Prior to the pre-study session, participants will have given the study team their oral consent  
42  
43 during telephone calls to confirm the time and place of the pre-study session. Participants will  
44  
45 be provided with the Participant Information Booklet (Supplementary 1: Information booklet)  
46  
47 and will sign a written informed consent form (Supplementary 6: Informed Consent Form)  
48  
49 before any data are collected. Participants will have the right to decline at this stage and to  
50  
51 remove consent at any time throughout the project if they choose.  
52  
53  
54  
55  
56  
57  
58  
59  
60

1  
2  
3 Ideally, the pre-study interview will occur in the participant's home in order for researchers  
4  
5 to note physical, organisational, and ergonomic factors that may affect the health-related  
6  
7 work conducted by the participant. Two researchers will make the home visit (to ensure  
8  
9 researcher safety) to interview the participant. If they prefer, participants may come to  
10  
11 Macquarie University for the interview.  
12

13  
14  
15 Following consent and before the beginning of the pre-study interview, participants will also  
16  
17 be asked to complete two brief questionnaires. The first is the demographic questionnaire  
18  
19 (Supplementary 3: Demographic Questionnaire), and the second is the Multimorbidity Illness  
20  
21 Perceptions Scale<sup>39</sup> (Supplementary 4: Multimorbidity Illness Perceptions Scale).  
22  
23  
24  
25

### 26 **Pre-study interview**

27  
28 After the completion of the questionnaires, a semi-structured interview will be conducted to  
29  
30 gain detailed information about the participant's life history, medical history, and existing  
31  
32 factors that impact patient work. Participants will be invited to talk about their health and  
33  
34 lifestyle, with the areas of focus in the interview separated roughly into life history, social life  
35  
36 and mental health, physical health and medical history, physical environment, and  
37  
38 organisational effort and attitude (Supplementary 7: Pre-study Interview Example Questions).  
39  
40 The interview will be audio-recorded with the participant's permission, to assist with later  
41  
42 data coding and thematic analysis (e.g. daily activities, their rationale behind such  
43  
44 behaviours, and the factors that influence why they behave in such a manner).  
45  
46  
47  
48  
49

50  
51 Lastly, the participant will be provided with the body-worn camera (Edesix VB-300,  
52  
53 Edinburgh) and Harmonised European Time Use Surveys UK Time-Use Diary.<sup>38</sup> Participants  
54  
55  
56  
57

1  
2  
3 will be instructed on the use of these tools. Photographs of the participant's medications,  
4  
5 medical devices and home environment will also be taken at this stage.  
6  
7

### 8 9 **Participant self-recording data collection**

10  
11 During the 24-hour study period, participants will be asked to wear the camera around their  
12  
13 neck on a lanyard during waking hours (12-16 hours). The Time-Use Diary will be completed  
14  
15 by the participant over the course of the same day for 24 hours. Participants will be given  
16  
17 instructions (Figure 2) to re-charge the camera overnight or if the battery becomes low.  
18  
19

### 20 21 22 **Post-study session**

23  
24 A post-study session will occur immediately after the 24-hour study period has concluded.  
25  
26 The camera footage will be downloaded and converted into images using software developed  
27  
28 in-house, with one screenshot taken for every 10 seconds of footage. The participants will be  
29  
30 able to view all their images alone before the research team views them, allowing the  
31  
32 participant to delete any or all unwanted images.  
33  
34  
35

### 36 37 38 **Post-study 'reconstruction' interview**

39  
40 The participant will then be interviewed for approximately 30 – 40 minutes (Supplementary  
41  
42 8: Post-study Interview Example Questions) along with their images. Participants will be  
43  
44 asked to describe the study day, using the screenshots and time-use diary as prompts to direct  
45  
46 the discussion, with a focus on health-related tasks. The interview will also be audio recorded  
47  
48 with the participant's permission to allow for thematic analysis of coded transcripts.  
49  
50

51  
52 After the interview, the participant will be asked to complete the Participant Experience  
53  
54 Survey (Supplementary 5) and provide feedback of the study process.  
55  
56  
57

## DATA ANALYSIS

Both qualitative and quantitative data will be gathered during the study and will include a mixture of subjectively reported and objectively collected data sources. While data gathered using the different instruments and methods will focus on different aspects of patient work, the varied sources are anticipated to be complementary. For example, self-reported data regarding physical activities via the time-use diary can be enriched through an examination of the screenshots from the body-worn camera. At the same time, screenshots from the camera may be difficult to analyse without an understanding of the participant's physical environment or motives behind their observed actions, which will be complemented by the home visits and interviews.

Utilising multiple types of data, the project generates a holistic report of patient work conducted by people living with type 2 diabetes in terms of observed physical work, organisational efforts, burden of disease, and attitudes and beliefs underlying health behaviours.

### Quantitative data analysis

Time-use data collected from participants using the body-worn camera will be analysed alongside information from the time-use diary.

The Multimorbidity Illness Perceptions Scale will be analysed using SPSS® (IBM, New York, USA) to assess the perceived burden of disease from the participants.

### Qualitative Data Analysis

1  
2  
3 Both pre-study and post-study interviews will be transcribed verbatim. Analysis of the  
4 interview transcripts will be conducted using the NVivo® thematic analysis software package  
5 (NVivo, Melbourne, Australia).<sup>40</sup> Two members of the research team will independently code  
6 the transcripts in a systematic manner. Any coding discrepancies between the two researchers  
7 will be resolved through reaching a consensus. Certain extracts or quotes from the transcripts  
8 may be provided to illustrate discovered themes in the interviews.  
9  
10  
11  
12  
13  
14  
15

16  
17  
18 The Time-Use Diary data will be analysed in conjunction with the camera screenshots. The  
19 daily activities reported in the Time-Use Diary and observed via the video footage will be  
20 coded using a standard time-use coding frame<sup>41</sup> to assess the duration, frequency, timing, and  
21 pattern of the participant's activity through the day. The data will be coded using the  
22 Harmonised European Time Use Surveys activity frame to classify activities.  
23  
24  
25  
26  
27  
28  
29  
30

31 Screenshots will be extracted automatically (1 screenshot every 10 seconds) from the video  
32 footage. Images will be tagged using the TensorFlow<sup>42</sup> and/or Clarifai™ (New York, USA)  
33 Application Programming Interface, which automatically generate tags that identify objects  
34 within the image and describe content of within the images. The tags will be sorted according  
35 to the activities in the Harmonised European Time Use Surveys code system to allow for  
36 easier calibration between different types of data.  
37  
38  
39  
40  
41  
42  
43  
44  
45

46 Photographs of the participant's medications, medical devices, and home environment and  
47 screenshots from the video will provide context to the interview. The photographs will also  
48 be used to give contextual feedback regarding the participant's existing patient work,  
49 particularly ergonomic factors.  
50  
51  
52  
53  
54  
55  
56  
57  
58  
59  
60

## ETHICS AND INFORMATION DISSIMINATION

Ethical considerations arising from this study are addressed below.

### **Consent and freedom to withdraw**

Participants' questions or concerns regarding the study will be addressed individually and with all due diligence. Participants will be free to withdraw from the study at any point, and will be able to remove the body-worn camera at any time during the study without giving a reason. The decision to join the study will have no consequence on their relationship with either Macquarie University or their health professionals. Patients will not be under any coercion to participate in the study.

### **Third-party and bystander consent**

The research team will provide participants with a wallet-sized card that includes the statement below with contact information of the research team, which can be shown to others (to reduce the psychological burden of the participant when faced with a potential confrontation) should anyone approach the participants to ask about the camera.

*"I am volunteering for a research project. The device is a wearable camera and the images will be used to record my daily activities. I am happy to remove it if you would like me to."*

The participants will also be reassured that they can turn off the body-worn camera at any time during the day. Should anyone request the video recordings to be deleted, we will ask participants to take note of the date and time that requests were made, and to assure the enquirer that the related recordings will be removed at the post-study session. Participants are also asked to inform their household members, friends and acquaintances that they will be

1  
2  
3 participating in the study, and to seek permission from these third parties prior to video  
4  
5 recording.

### 6 7 8 9 **Personal privacy**

10 Participants will be asked to keep the body-worn camera off during situations when anyone  
11  
12 (including themselves) is dressing, undressing, using the bathroom, showering, or during any  
13  
14 situations where privacy is of concern. Participants will be advised that they should always  
15  
16 prioritise their own personal safety and comfort above the study's requirements.  
17  
18

19  
20  
21  
22 Furthermore, participants will be able to view and delete any (or all) of the extracted images  
23  
24 before the researchers view any of the images or videos at the start of the post-study session.  
25  
26 The videos will be deleted immediately after images are extracted. Only members of the  
27  
28 research team will have access to the images. None of the video or extracted images will be  
29  
30 released to the public, academic peers, or to participants. Should participants provide written  
31  
32 informed consent for the research team to use their images in publications or presentations,  
33  
34 the images will be blurred such that no one is identifiable.  
35  
36  
37  
38

39 To ensure the participant's privacy, their name and other identifying information will be  
40  
41 removed in the photos of the medications.  
42  
43  
44  
45

### 46 **Participant feedback**

47  
48 Participants will be asked about their experiences of wearing the camera during the post-  
49  
50 study interview. A survey to assess the participant's experience with the diary and the body-  
51  
52 worn camera (Supplementary 5) will also be administered. Participants will be provided with  
53  
54 contact details of the research team (email and phone number) for contact during the study.  
55  
56  
57  
58

### **Psychological support**

In the unlikely case that participants become psychologically distressed during either of the interview sessions, a staff member with counselling experience will be present in both interviews to deal with any anxiety the participant may experience. Should participants experience high levels of distress during the study day, they will be advised that they should immediately attend their local hospital emergency department, general practitioner, and/or call Lifeline or Emergency Services.

### **Identification**

Participant identities will not be masked during data collection. Participants will be individually identifiable due to the small sample size. However, their identities will only be known to the research team, and only members of the research team will have access to identifiable data (such as photos). Data will be separated from contact details and stored in separate locations.

### **Information dissemination**

Great caution will be taken in the handling and storage of the data by the research team so that risks to privacy are minimised, in accordance with the Australian Code for the Responsible Conduct of Research. Only members of the research team will have access to the data. The videos will be downloaded into a secure browser in a password-protected computer or secure Macquarie University servers. All physical copies of surveys and questionnaires will be locked in secure cabinets at Macquarie University. The data will be held for a minimum of 5 years. Anonymity will be upheld throughout reporting, and participants will only be referred to by their participant number.



## CONCLUSION

This study will test a novel mixed-method approach using a digital data collection device, interviews, time-use diaries, and questionnaires to investigate the nature and extent of patient work in participants with type 2 diabetes with at least one chronic co-morbidity. Results from this study will serve to assess whether passive observation of participants via a body-worn camera, combined with self-reported activities using the Time-Use Diary, and open-ended interviews will result in more holistic and informative coverage of patient work.

### Author's contributions:

Study conceptualisation: AL, EC; Study design: AL, KY, TH, JG; Data collection instrument preparation: KY, TH, AL, LL; Recruitment and liaison: KH, SV; First draft: KY, AL; Draft revision: all authors provided feedback and approved the manuscript.

### Acknowledgements:

- Financial: The project is supported by New South Wales Health Early-to-Mid Career Research Fellowship awarded to AL. The funding body did not have a role in study design and execution; data collection, management, analysis, and interpretation; or manuscript preparation, review, or approval.
- Technical: The screenshot extraction and tagging system was developed in-house by Mr Wen-Jun Liang and Mr Joshua Haddrill, two work placement students from the Faculty of Engineering at Macquarie University.
- Study: Mr Joshua Jung, Ms Isabelle Barnes, Mr Jiawei He, and Mr Christian Tran (work placement students from Macquarie University) assisted with participant recruitment, home visits, and administrative tasks.

- 1  
2  
3 • Participant recruitment: Professor Bernard Tuch and Dr Priscilla Wong, who assisted  
4 with recruitment at the early stages of the study.  
5  
6  
7 • The authors would like to thank the study participants for their valuable time and input.  
8  
9

#### 10 11 Competing interests:

12  
13 Some participants may be recruited via the Macquarie Health General Practitioner clinic and  
14 Macquarie Hospital, where SV is practicing as a general practitioner and KH is practicing as  
15 an endocrinologist, respectively. Therefore, the two team members may be responsible for  
16 the treatment of some participants. However, SV and KH will not know whether a patient is a  
17 participant unless the participant informs them.  
18  
19  
20  
21  
22  
23  
24  
25

26  
27 Figure 1: Flow diagram illustrating the tasks involved at each stage of the study.

28  
29 Figure 2: Instructions provided to participants regarding the operation of the body-worn  
30 camera.  
31  
32  
33  
34  
35  
36  
37  
38  
39

#### 40 41 **References**

- 42 1. Kaptein AA, Fischer MJ, Scharloo M. Self-management in patients with COPD: theoretical  
43 context, content, outcomes, and integration into clinical care. *Int J Chron Obstruct*  
44 *Pulmon Dis* 2014;9:907-17. doi: <http://dx.doi.org/10.2147/COPD.S49622>  
45  
46 2. Apps LD, Harrison SL, Williams JEA, et al. How do informal self-care strategies evolve  
47 among patients with chronic obstructive pulmonary disease managed in primary  
48 care? A qualitative study. *Int J Chron Obstruct Pulmon Dis* 2014;9:257-63. doi:  
49 <http://dx.doi.org/10.2147/COPD.S52691>  
50  
51 3. Bodenheimer T, Lorig K, Holman H, et al. Patient Self-management of Chronic Disease in  
52 Primary Care. *J Am Med Assoc* 2002;288:2469-75.  
53  
54 4. Clark NM, Gong M, Kaciroti N. A Model of Self-Regulation for Control of Chronic Disease.  
55 *Health Educ Behav* 2001;28:769-82. doi: 10.1177/109019810102800608  
56  
57  
58  
59  
60

- 1
- 2
- 3 5. Valdez RS, Holden RJ, Novak LL, et al. Transforming consumer health informatics through
- 4 a patient work framework: connecting patients to context. *J Am Med Inform Assoc*
- 5 2015;22:2-10. doi: doi:10.1136/amiajnl-2014-002826
- 6
- 7 6. Mickelson RS, Holden RJ. Medication management strategies used by older adults with
- 8 heart failure: A systems-based analysis. *Eur J Cardiovasc Nurs* 2017;1(11) doi:
- 9 10.1177/1474515117730704
- 10
- 11 7. Mickelson RS, Unertl KM, Holden RJ. Medication Management: The Macrocognitive
- 12 Workflow of Older Adults With Heart Failure. *JIMR Human Factors* 2016;3(2):e27.
- 13 doi: 10.2196/humanfactors.6338
- 14
- 15 8. Thille P, Ward N, Russell G. Self-management support in primary care: Enactments,
- 16 disruptions, and conversational consequences. *Soc Sci Med* 2014;108:97-105. doi:
- 17 <http://dx.doi.org/10.1016/j.socscimed.2014.02.041>
- 18
- 19 9. Crowley MJ, Holleman R, Klamerus ML, et al. Factors associated with persistent poorly
- 20 controlled diabetes mellitus: Clues to improving management in patients with
- 21 resistant poor control. *Chronic Illness* 2014;10(4):291–302. doi:
- 22 10.1177/1742395314523653
- 23
- 24 10. Free C, Phillips G, Galli L, et al. The Effectiveness of Mobile-Health Technology-Based
- 25 Health Behaviour Change or Disease Management Interventions for Health Care
- 26 Consumers: A Systematic Review. *PLoS Med* 2013;10(1):e1001362. doi:
- 27 10.1371/journal.pmed.1001362
- 28
- 29 11. Alzubaidi H, Namara KM, Browning C. Time to question diabetes self-management
- 30 support for Arabic-speaking migrants: exploring a new model of care. *Diabet Med*
- 31 2017;34:348–55. doi: 10.1111/dme.13286
- 32
- 33 12. Schinckus L, Dangoisse F, Broucke SVd, et al. When knowing is not enough: Emotional
- 34 distress and depression reduce the positive effects of health literacy on diabetes
- 35 self-management. *Patient Educ Couns* 2017 doi:
- 36 <http://dx.doi.org/10.1016/j.pec.2017.08.006>
- 37
- 38 13. Valdez RS, Gibbons MC, Siegel ER, et al. Designing consumer health IT to enhance
- 39 usability among different racial and ethnic groups within the United States. *Health*
- 40 *and technology* 2012;2:225-33. doi: 10.1007/s12553-012-0031-6
- 41
- 42 14. Farvolden P, Denisoff E, Selby P, et al. Usage and Longitudinal Effectiveness of a Web-
- 43 Based Self-Help Cognitive Behavioral Therapy Program for Panic Disorder. *J Med*
- 44 *Internet Res* 2005;7(1):e7. doi: 10.2196/jmir.7.1.e7
- 45
- 46 15. Eysenbach G. The Law of Attrition. *J Med Internet Res* 2005;7(1):e11. doi:
- 47 10.2196/jmir.7.1.e11
- 48
- 49 16. Yu CH, Bahniwal R, Laupacis A, et al. Systematic review and evaluation of web-accessible
- 50 tools for management of diabetes and related cardiovascular risk factors by patients
- 51 and healthcare providers. *J Am Med Inform Assoc* 2012;19:514e22. doi:
- 52 10.1136/amiajnl-2011-000307
- 53
- 54 17. Holden RJ, Valdez RS, Schubert CC, et al. Macroergonomic factors in the patient work
- 55 system: examining the context of patients with chronic illness. *Ergonomics*
- 56 2017;16(1):26-43. doi: 10.1080/00140139.2016.1168529
- 57
- 58 18. Novak LL, Unertl KM, Holden RJ. Realizing the Potential of Patient Engagement:
- 59 Designing IT to Support Health in Everyday Life. *Stud Health Technol Inform*
- 60 2016;222:237–47.

19. Valdez RS, Guterbock TM, Fitzgibbon K, et al. From loquacious to reticent: understanding patient health information communication to guide consumer health IT design. *J Am Med Inform Assoc* 2017;24(4):680–96. doi: 10.1093/jamia/ocw155
20. Holden RJ, Schubert CC, Mickelson RS. The patient work system: An analysis of self-care performance barriers among elderly heart failure patients and their informal caregivers. *Appl Ergon* 2015;March:133-50. doi: 10.1016/j.apergo.2014.09.009
21. Carayon P, Karsh B-T, Gurses AP, et al. Macroergonomics in Healthcare Quality and Patient Safety. *Review of Human Factors and Ergonomics* 2013;8(1):4-54. doi: 10.1177/1557234X13492976
22. Heiden SM, Holden RJ, Alder CA, et al. Human factors in mental healthcare: A work system analysis of a community-based program for older adults with depression and dementia. *Appl Ergon* 2017;64:27-40. doi: doi.org/10.1016/j.apergo.2017.05.002
23. McCambridge J, Witton J, Elbourne DR. Systematic review of the Hawthorne effect: New concepts are needed to study research participation effects. *J Clin Epidemiol* 2014;67(3) doi: doi.org/10.1016/j.jclinepi.2013.08.015
24. Kelly P, Thomas E, Doherty A, et al. Developing a Method to Test the Validity of 24 Hour Time Use Diaries Using Wearable Cameras: A Feasibility Pilot. *PLoS One* 2015;e0142198 doi: DOI:10.1371/journal.pone.0142198
25. Kelly P, Marshall SJ, Badland H, et al. An Ethical Framework for Automated, Wearable Cameras in Health Behavior Research. *Am J Prev Med* 2013;44(3):314-19. doi: <http://dx.doi.org/10.1016/j.amepre.2012.11.006>
26. Doherty AR, Kelly P, Kerr J, et al. Using wearable cameras to categorise type and context of accelerometer-identified episodes of physical activity. *International Journal of Behavioral Nutrition and Physical Activity* 2013;10(22) doi: <http://www.ijbnpa.org/content/10/1/22>
27. Kerr J, Marshall SJ, Godbole S, et al. Using the SenseCam to Improve Classifications of Sedentary Behavior in Free-Living Settings. *Am J Prev Med* 2013;44(3):290–96. doi: <http://dx.doi.org/10.1016/j.amepre.2012.11.004>
28. Gemming L, Rush E, Maddison R, et al. Wearable cameras can reduce dietary under-reporting: doubly labelled water validation of a camera-assisted 24 h recall. *Br J Nutr* 2015;113:284–91. doi: 10.1017/S0007114514003602
29. Doherty AR, Hodges SE, King AC, et al. Wearable Cameras in Health: The State of the Art and Future Possibilities. *Am J Prev Med* 2013;44(3):320–23. doi: <http://dx.doi.org/10.1016/j.amepre.2012.11.008>
30. Khazrai YM, Defeudis G, Pozzilli P. Effect of diet on type 2 diabetes mellitus: a review. *Diabetes Metab Res Rev* 2014;30(Suppl. 1):24-33. doi: 0.1002/dmrr.2515
31. Wilding JPH. The importance of weight management in type 2 diabetes mellitus. *Int J Clin Pract* 2014;68(6):682-91. doi: 10.1111/ijcp.12384
32. Balducci S, Sacchetti M, Haxhi J, et al. Physical exercise as therapy for type 2 diabetes mellitus. *Diabetes Metab Res Rev* 2014;Suppl. 1:13-23. doi: 10.1002/dmrr.2514
33. Costa LA, Canani LH, Lisbôa HRK, et al. Aggregation of features of the metabolic syndrome is associated with increased prevalence of chronic complications in Type 2 diabetes. *Diabet Med* 2004;21(3):252-55. doi: 10.1046/j.1464-5491.2003.01124.x
34. Bosi E, Scavini M, Ceriello A, et al. Intensive Structured Self-Monitoring of Blood Glucose and Glycemic Control in Noninsulin-Treated Type 2 Diabetes. *Diabetes Care* 2013;36(10):2887-94. doi: 10.2337/dc13-0092

- 1  
2  
3 35. Khunti K, Davies MJ, Kalra S. Self-titration of insulin in the management of people with  
4 type 2 diabetes: a practical solution to improve management in primary care.  
5 *Diabetes Obes Metab* 2013;15(8):690-700. doi: 10.1111/dom.12053  
6  
7 36. Wasem J, Bramlage P, Gitt AK, et al. Co-morbidity but not dysglycaemia reduces quality  
8 of life in patients with type-2 diabetes treated with oral mono- or dual combination  
9 therapy – an analysis of the DiaRegis registry. *Cardiovasc Diabetol* 2013;12(47) doi:  
10 10.1186/1475-2840-12-47  
11  
12 37. Kannan H, Thompson S, Bolge SC. Economic and Humanistic Outcomes Associated With  
13 Comorbid Type-2 Diabetes, High Cholesterol, and Hypertension Among Individuals  
14 Who Are Overweight or Obese. *J Occup Environ Med* 2008;50(5):542-9. doi:  
15 10.1097/JOM.0b013e31816ed569  
16  
17 38. Eurostat. Harmonised European Time Use Surveys 2008 Guidelines. Luxembourg:  
18 Eurostat, 2009.  
19  
20 39. Gibbons CJ, Kenning C, Coventry PA, et al. Development of a Multimorbidity Illness  
21 Perceptions Scale (MULTIPLEs). *PLoS One* 2013;8(12):e81852. doi:  
22 10.1371/journal.pone.0081852  
23  
24 40. Braun V, Clarke V. Using thematic analysis in psychology. *Qual Res Psychol* 2006;3(2):77-  
25 101. doi: <http://dx.doi.org/10.1191/1478088706qp063oa>  
26  
27 41. Oxford Uo. MULTINATIONAL TIME USE STUDY - USER'S GUIDE AND DOCUMENTATION,  
28 2012.  
29  
30 42. Abadi M, Agarwal A, Barham P, et al. TensorFlow: Large-Scale Machine Learning on  
31 Heterogeneous Distributed Systems. 2016 doi: arXiv:1603.04467v2 [cs.DC]  
32  
33  
34  
35  
36  
37  
38  
39  
40  
41  
42  
43  
44  
45  
46  
47  
48  
49  
50  
51  
52  
53  
54  
55  
56  
57  
58  
59  
60

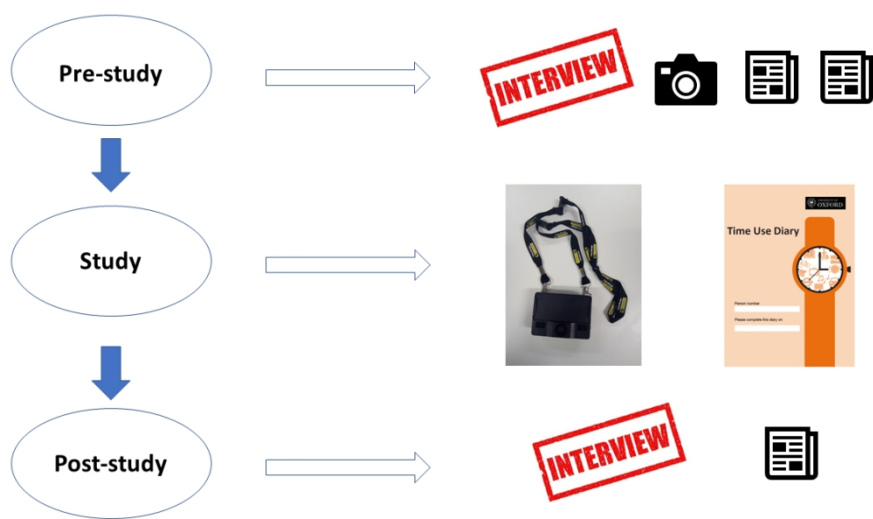

Figure 1: Flow diagram illustrating the tasks involved at each stage of the study.

108x60mm (300 x 300 DPI)

1  
2  
3  
4  
5  
6  
7  
8  
9  
10  
11  
12  
13  
14  
15  
16  
17  
18  
19  
20  
21  
22  
23  
24  
25  
26  
27  
28  
29  
30  
31  
32  
33  
34  
35  
36  
37  
38  
39  
40  
41  
42  
43  
44  
45  
46  
47  
48  
49  
50  
51  
52  
53  
54  
55  
56  
57  
58  
59  
60

|                                                                                     |                                                                                                                                                                            |                                                                                            |
|-------------------------------------------------------------------------------------|----------------------------------------------------------------------------------------------------------------------------------------------------------------------------|--------------------------------------------------------------------------------------------|
|                                                                                     |                                                                                           | <p>Recording</p>                                                                           |
|                                                                                     |                                                                                           | <p>Recording,<br/>low<br/>battery</p>                                                      |
|   |                                                                                                                                                                            | <p>Not<br/>recording:<br/>Red = needs<br/>charging<br/>Green =<br/>battery is<br/>okay</p> |
|                                                                                     |                                                                                          | <p>Flat<br/>battery<br/>needs<br/>charging</p>                                             |
|  | <p>→ <b>Button</b><br/>Press Once to turn on<br/>(red record light will<br/>come on)<br/>Hold to turn off (Red<br/>record light turns off)</p> <p>→ <b>Camera Lens</b></p> |                                                                                            |

Figure 2: Instructions provided to participants regarding the operation of the body-worn camera.

77x112mm (300 x 300 DPI)



---

## Information Booklet for Participants

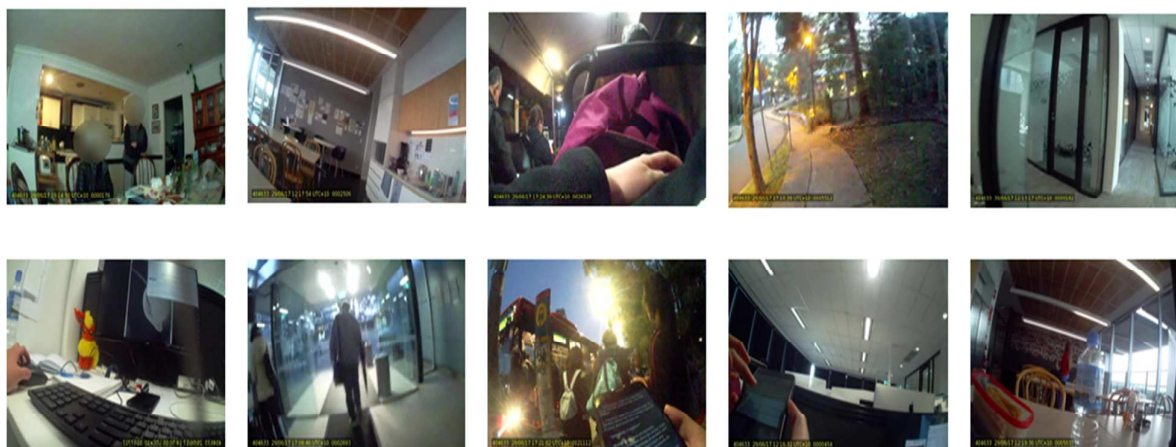

If you have any questions about the study, please contact

Dr Annie Lau

[annie.lau@mq.edu.au](mailto:annie.lau@mq.edu.au)

Telephone: (02) 9850 2436

Dr Kathleen Yin

[kathleen.yin@mq.edu.au](mailto:kathleen.yin@mq.edu.au)

Telephone: (02) 9850 2477



## Information for participants

Recently we invited you to take part in a research project investigating the amount of 'patient work' you conduct for Type 2 diabetes and other chronic health conditions. This information booklet is designed to fully inform you about the project before you agree to participate.

### ***About the study***

Living with a health condition does not come naturally. Following a diagnosis or medical interventions, patients and their families must undertake extra work to accommodate their health condition, such as making time to administer medications, visit medical professionals, or prepare meals.

The concept of 'patient work' describes these health-related tasks the patient must somehow integrate into their daily routine. When integrated poorly, these tasks have the potential to generate extra stress, contributing to non-compliance, and negatively affecting the health outcomes of the patient.

Type 2 diabetes is known to require significant amounts of patient work on a daily basis, and for patients who also have other health conditions, the amount of patient work can increase exponentially.

The aim of this study is to observe and document how patient work impacts individuals with type 2 diabetes and at least one other chronic comorbidity. The goal is gain a better understanding of the daily routines of those affected by type 2 diabetes and other health conditions, so that we can understand how to integrate healthcare interventions more seamlessly into our daily lives in order to improve health outcomes.

### ***Do I have to take part?***

You are free to decide whether or not to take part in this study. If you agree, we will ask you to sign an informed consent form. If you agree and then later decide not to take part, you can leave the study at any time by advising the researchers of your decision. There will be no penalty to you for leaving the study at any time.

## ***Who can participate?***

Participants are required to be consenting adults who:

- are able to speak, write and read in English;
- are aged 18 years and older;
- are diagnosed with type 2 diabetes and at least one more chronic health condition;
- are willing to fill in a time-use diary for one day; and
- agree to wear the Edesix body camera on their person for one day.

Exclusion criteria include:

- pregnancy;
- critical illness;
- end-stage disease;
- dementia;
- severe mental disorders that prevent participants from giving consent; or
- needing assistance with basic daily living such as reading, writing, dressing and eating.

## ***What would I have to do?***

If you decide to participate, we will ask you to complete three tasks:

- First, we will ask you to attend a pre-study session at Macquarie University, or a place of your choice (e.g. your home), where you will be given information about the study, provide written consent if you are willing to participate, and complete two questionnaires about your personal information and your health (approximately 5-10 minutes each). (Note: you can do these questionnaires in your own time).

Afterwards, we will ask you to tell us about your health and the activities you do for your health (approximately 1 hour). This interview will be audio recorded for future analysis. You can terminate the interview at any point.

With your permission, we will take photos of your surroundings and the tools you use to manage your health (e.g. medications, devices, home environment), where information identifying you (e.g. names on prescription label) will be masked.

- Next, we will give you two pieces of equipment to collect data about your day (body camera and Time-Use Diary).

We will ask you to fill out a Time-Use Diary for 24 hours, and wear an Edesix body camera during the waking hours of the same day (approximately 8-14 hours).

You are free to remove the camera at any time. Particularly, we recommend you to turn off the camera when anyone (including yourself) is dressing or undressing, using the bathroom or showers, during any situations where privacy is of concern, or any other time that you or others might feel uncomfortable.

If you are in the company of others (e.g. household members, friends and/or acquaintances), we ask you to seek permission from these third parties prior to video recording.

- Soon after data collection, you will be asked to visit the study centre at Macquarie University to return the diary and the data gathering tools, as well as for a post-study reconstruction interview. If you prefer to not travel, the research team will endeavour to visit you at your home (or your preferred location). This session will take approximately 1 hour.

The videos from the body camera will be downloaded onto a secure computer and you will be invited to view them alone. You may delete any or all of them without giving any reason. The researcher will not view any of the videos until you have done this.

We will ask you to look through the videos with us and tell us about your daily activities, especially health-related tasks. This interview will take approximately 30-40 minutes. We will also ask you to fill in a questionnaire about your experiences of wearing the camera and completing the Diary (approximately 10 minutes).

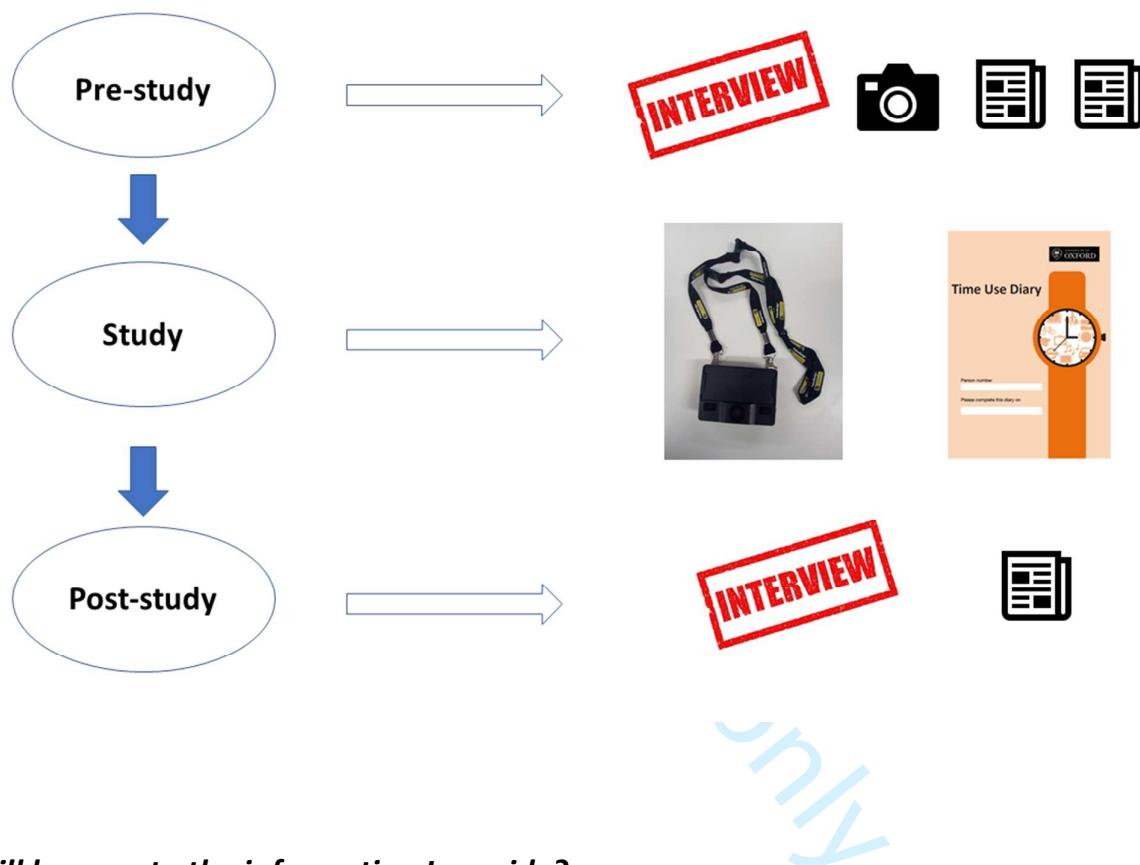

### ***What will happen to the information I provide?***

Your confidentiality will be respected at all times. All your data, including the videos will be stored on a password-protected computer. You will never be identified or have your image shown without your written permission. The results from this research project will be submitted for publication in academic journals and used to inform researchers on future work. Researchers outside this project may request to analyse your anonymised data, but will be required to follow the same highest standards of research integrity and ethics expected of Macquarie University researchers.

### ***Who will conduct the study?***

There are four researchers from Macquarie University conducting this study, who are available to answer any questions or concerns you may have:

- Macquarie University
  - Dr Annie Lau ([annie.lau@mq.edu.au](mailto:annie.lau@mq.edu.au) 02 9850 2436)
  - Dr Kathleen Yin ([kathleen.yin@mq.edu.au](mailto:kathleen.yin@mq.edu.au) 02 9850 2477)
  - Dr Liliana Laranjo ([liliana.laranjo@mq.edu.au](mailto:liliana.laranjo@mq.edu.au) 02 9850 2426)
  - Prof Enrico Coiera ([enrico.coiera@mq.edu.au](mailto:enrico.coiera@mq.edu.au) 02 9850 2403)
  - A/Prof Kenneth Ho
  - Mr Wen Jun Liang (Bachelor of Engineering)
  - Mr Joshua Haddrill (Bachelor of Engineering)
  - Ms Isabelle Barnes (Bachelor of Clinical Science)
  - Mr Joshua Jung (Bachelor of Clinical Science)
  - Mr Christian Tran (Bachelor of Commerce and Arts (Psychology))
  - Mr Jiawei He (Bachelor of Commerce and Arts (Psychology))
- MQ Health General Practice
  - Dr Sanjyot Vagholkar
- University of Oxford
  - Dr Teresa Harms
  - Prof Jonathan Gershuny

### ***What are the possible benefits of taking part in this study?***

You will receive a \$60 shopping voucher as remuneration for participating in the study.

### ***What are the possible disadvantages in taking part in the study?***

We do not anticipate that participating in this project will have any significant effects on your lifestyle. If you do not want to answer any of the questions in the questionnaires or interview, you do not have to. You will also be able to check and delete any videos taken prior to the researchers viewing the videos.

It is possible that while wearing the camera you may be asked about the device by members of the public. In this case we suggest that you say the following:

*“I am volunteering for a research project. The device is a wearable camera and the images will be used to record my daily activities. I am happy to remove it if you would like me to.”*

We will provide you with a wallet-size card that includes this statement and contact information for you to show others if you wish.

Please remember to always prioritise your own personal safety and comfort above the study's requirements.

### ***What happens next?***

If you decide that you do not want to take part in the study, we thank you for taking the time to consider it.

### ***What if there is a problem?***

Approval to conduct this research has been provided by Macquarie University, in accordance with its ethics review and approval procedures. Any person considering participation in this research project, or agreeing to participate, may raise any questions or issues with the researchers at any time. In addition, any person not satisfied with the response of researchers may raise ethics issues or concerns, and may make any complaints about this research project by contacting the Human Research Ethics Committee at Macquarie University on (02) 9850 7854 or by emailing to [ethics@mq.edu.au](mailto:ethics@mq.edu.au).

All research participants are entitled to retain a copy of any Participant Information Form and/or Participant Consent Form relating to this research project.

If you have a concern about any aspect of this project, please speak to a member of the research team: Annie Lau ([annie.lau@mq.edu.au](mailto:annie.lau@mq.edu.au) 02 9850 2436) or Kathleen Yin ([kathleen.yin@mq.edu.au](mailto:kathleen.yin@mq.edu.au) 02 9850 2477).

1  
2  
3  
4  
5  
6  
7  
8  
9  
10  
11  
12  
13  
14  
15  
16  
17  
18  
19  
20  
21  
22  
23  
24  
25  
26  
27  
28  
29  
30  
31  
32  
33  
34  
35  
36  
37  
38  
39  
40  
41  
42  
43  
44  
45  
46  
47  
48  
49  
50  
51  
52  
53  
54  
55  
56  
57  
58  
59  
60

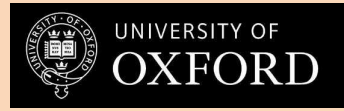

# Time Use Diary

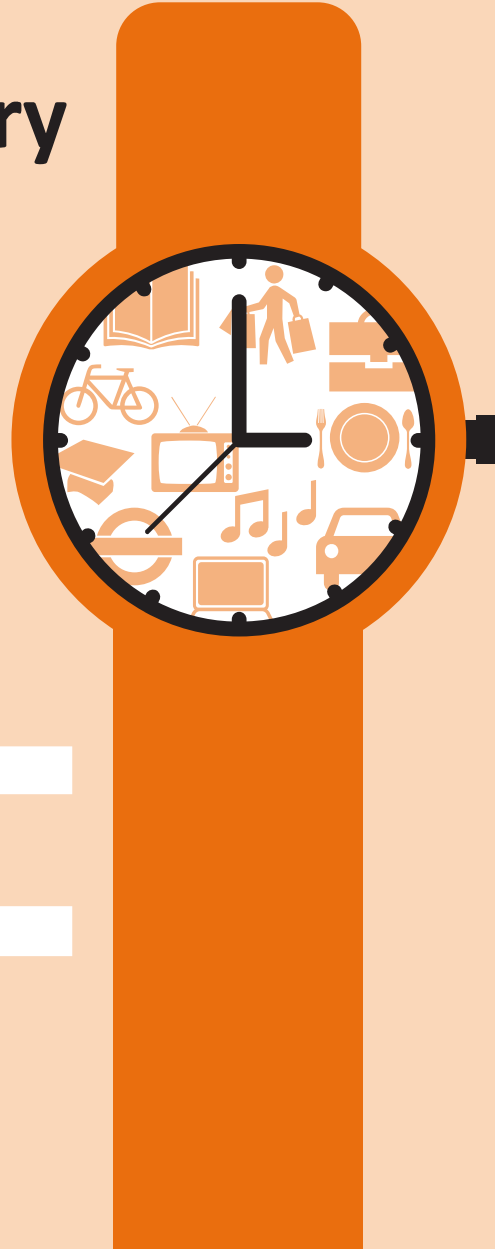

Person number

Please complete this diary on

# Diary instructions

**Please read the instructions below to help you fill in your diary. There is also an example of a filled in diary on the next page to help you.**

## When should I fill in the diary?

- The front of the diary tells you which day we would like you to complete the diary for.
- The diary starts at 4am and covers 24 hours, with three hours on each page.
- Please take the diary with you during the day and fill it in every now and then when you have a spare moment. For example on the bus or train, at lunchtime or while you wait for someone.

## Completing the diary

### What were you doing?

- In this column, record what you consider to be your main activity for each 10 minute period.
- If you were doing more than one activity at the same time, only record the main activity in this column.
- If you did one thing after another during the 10 minutes, record the activity that took the most time.
- If you were doing something you feel is too private to record, please write "personal".

## Work

- You don't need to record exactly what you were doing during work time.
- If you have more than one job, please record which one you were working at.
- Please record what you did during breaks. For example, "Lunch break, had lunch" or "Lunch break, went for a walk".
- Include any work you've taken home and completed at home.

## School / college

- Please record whether you study at home or attend classes / lectures.
- Include the type of study, such as secondary school, university etc.
- If the studies are part of paid work, please note this in the diary.

## Housework and childcare

- Please record what you were really doing. For example, "Cooked supper", "Washed the dishes", "Put my child to bed", "Mowed the lawn", "Cleaned the house", "Washed the car".

## Sleeping

- Please record any occasions during the night when you weren't sleeping. For example, if you have woken up and are doing nothing, reading or caring for children etc.

## Reading

- If you were reading, please record what you read. For example, "Read a newspaper", "Read a magazine", "Read a book".
- If you were reading on a tablet or e-reader such as a Kindle, please remember to fill in the 'Did you use a smartphone, tablet or computer?' column.

## Help to other households

- If you were helping someone who lives outside of your household, either totally or in part, please report this in the diary.
- For example, if you helped a friend repair their house, record this as "Helped friend repairing house". If you bought a neighbour some food while you did your own shopping, please record this too.

## If you did something else at the same time, what else did you do?

- You should use this column to record any activities that you were doing at the same time as your main activity. These are called secondary activities.
- For example, if you were looking after your child (main activity) and watching television at the same time, then you would record "watching television" in this column.
- It is up to you which activity you think is the main activity and which is the secondary activity.
- Don't forget to record secondary activities during lunch or coffee breaks during work or while travelling.

## Did you use a smartphone, tablet or computer?

- Please record in this column whether you were using a smartphone, tablet or computer while you were doing either the main or secondary activity and how long you were using it for. For example, if you were travelling to town on the bus and were checking emails on your smartphone then record how long you were using it for.
- Draw a line or arrow to indicate how long you spent using your smartphone, tablet or computer.

## Where were you?

- This column is to record where you were during the activity and if you were travelling, what your mode of transport was. For example, "at home", "at work", "by car".

## Were you alone or with somebody you know?

- Please indicate whether you were alone or together with somebody you know.
- To be together does not necessarily mean that you actually do things together but rather that somebody else was around.
- Draw a line or arrow to show how long you were alone or with somebody you know. This may change during an activity. For example, somebody might leave or arrive.
- If you were with a child aged 7 years or younger who lives with you, record this in the column 'Children aged 0-7'. If you were with a child aged older than 7 years who lives with you then record this in the 'Other person' column.
- If you were with a relative that doesn't live with you, record this in the 'Others you know' column.

## How much did you enjoy this time?

- Please write in how much you enjoyed the time on a scale of 1 to 7, with 1 meaning you didn't enjoy it at all and 7 meaning that you enjoyed it very much.
- Your level of enjoyment may change during an activity. If so, please record the new level of enjoyment too.

## Checklist

- When you have finished filling in your diary, please answer the checklist questions at the end of the diary day.
- There is also a checklist to remind you of the key things to remember to record.



# Example

- Record your main activity for each 10-minute period
- Only one main activity on each line!
- Distinguish between first and second job, if any.
- Distinguish between travel and the activity that is the reason for travelling.
- Don't forget the mode of transport or location and whether you were using a smartphone, tablet or computer.
- Please remember to record who you were with.

- For each 10-minute period, please write in how much you enjoyed this time on a scale of 1 to 7, with 1 meaning you didn't enjoy it at all and 7 meaning that you enjoyed it very much.
- For example, if you didn't enjoy an activity at all then you would write 1 in the box.

This includes children aged 8 and over

## Time: 7am – 10am Morning

| Time: 7am-10am Morning (am) | What were you doing?<br>Please write down one main activity. | If you did something else at the same time, what else did you do? | Did you use a smartphone, tablet, or computer? | Where were you?<br>Location, or mode of transport | Were you alone or with somebody you know?<br>Mark all relevant boxes |                          |                          |                          |                          |                          | How much did you enjoy this time?<br>1 = not at all<br>7 = very much |                 |
|-----------------------------|--------------------------------------------------------------|-------------------------------------------------------------------|------------------------------------------------|---------------------------------------------------|----------------------------------------------------------------------|--------------------------|--------------------------|--------------------------|--------------------------|--------------------------|----------------------------------------------------------------------|-----------------|
|                             |                                                              |                                                                   |                                                |                                                   | Alone                                                                | Spouse / partner         | Mother                   | Father                   | Child aged 0-7           | Other person             |                                                                      | Others you know |
| 7am-7.10                    | Woke up the children                                         |                                                                   | <input type="checkbox"/>                       | At home                                           | <input type="checkbox"/>                                             | <input type="checkbox"/> | <input type="checkbox"/> | <input type="checkbox"/> | <input type="checkbox"/> | <input type="checkbox"/> | <input type="checkbox"/>                                             | 5               |
| 7.10-7.20                   | Had breakfast                                                | checked emails                                                    | <input checked="" type="checkbox"/>            | on foot                                           | <input type="checkbox"/>                                             | <input type="checkbox"/> | <input type="checkbox"/> | <input type="checkbox"/> | <input type="checkbox"/> | <input type="checkbox"/> | <input type="checkbox"/>                                             | 6               |
| 7.20-7.30                   | "                                                            | Talked with my family                                             | <input type="checkbox"/>                       |                                                   | <input type="checkbox"/>                                             | <input type="checkbox"/> | <input type="checkbox"/> | <input type="checkbox"/> | <input type="checkbox"/> | <input type="checkbox"/> | <input type="checkbox"/>                                             | 5               |
| 7.30-7.40                   | Cleared the table                                            | Listened to the radio                                             | <input checked="" type="checkbox"/>            |                                                   | <input type="checkbox"/>                                             | <input type="checkbox"/> | <input type="checkbox"/> | <input type="checkbox"/> | <input type="checkbox"/> | <input type="checkbox"/> | <input type="checkbox"/>                                             | 4               |
| 7.40-7.50                   | Helped the children dressing                                 | Talked with my children                                           | <input type="checkbox"/>                       | on foot                                           | <input checked="" type="checkbox"/>                                  | <input type="checkbox"/> | <input type="checkbox"/> | <input type="checkbox"/> | <input type="checkbox"/> | <input type="checkbox"/> | <input type="checkbox"/>                                             | 7               |
| 8am-8.10                    | "                                                            |                                                                   | <input type="checkbox"/>                       |                                                   | <input type="checkbox"/>                                             | <input type="checkbox"/> | <input type="checkbox"/> | <input type="checkbox"/> | <input type="checkbox"/> | <input type="checkbox"/> | <input type="checkbox"/>                                             |                 |
| 8.10-8.20                   | Went to the day care centre                                  |                                                                   | <input type="checkbox"/>                       |                                                   | <input type="checkbox"/>                                             | <input type="checkbox"/> | <input type="checkbox"/> | <input type="checkbox"/> | <input type="checkbox"/> | <input type="checkbox"/> | <input type="checkbox"/>                                             | 1               |

Use an arrow or quote marks to record that an activity lasted longer than 10 minutes.

1  
2  
3  
4  
5  
6  
7  
8  
9  
10  
11  
12  
13  
14  
15  
16  
17  
18  
19  
20  
21  
22  
23  
24  
25  
26  
27  
28  
29  
30  
31  
32  
33  
34  
35  
36  
37  
38  
39  
40  
41  
42  
43  
44  
45  
46  
47  
48  
49  
50  
51  
52  
53  
54  
55  
56  
57  
58  
59  
60

| Time: 4am – 7am<br>Early morning |                                                              | Time: 4am – 7am                                |                                                   | Were you alone or with somebody you know?<br>Mark all relevant boxes |                          |                          |                          |                          |                          |                          | How much did you enjoy this time?<br>1 = not at all<br>7 = very much |
|----------------------------------|--------------------------------------------------------------|------------------------------------------------|---------------------------------------------------|----------------------------------------------------------------------|--------------------------|--------------------------|--------------------------|--------------------------|--------------------------|--------------------------|----------------------------------------------------------------------|
|                                  |                                                              |                                                |                                                   | People who live with you                                             |                          |                          |                          |                          |                          |                          |                                                                      |
| Time:<br>4am-7am<br>Morning (am) | What were you doing?<br>Please write down one main activity. | Did you use a smartphone, tablet, or computer? | Where were you?<br>Location, or mode of transport | Alone                                                                | Spouse / partner         | Mother                   | Father                   | Child aged 0-7           | Other person             | Others you know          |                                                                      |
| 4am-4.10                         |                                                              | <input type="checkbox"/>                       |                                                   | <input type="checkbox"/>                                             | <input type="checkbox"/> | <input type="checkbox"/> | <input type="checkbox"/> | <input type="checkbox"/> | <input type="checkbox"/> | <input type="checkbox"/> |                                                                      |
| 4.10-4.20                        |                                                              | <input type="checkbox"/>                       |                                                   | <input type="checkbox"/>                                             | <input type="checkbox"/> | <input type="checkbox"/> | <input type="checkbox"/> | <input type="checkbox"/> | <input type="checkbox"/> | <input type="checkbox"/> |                                                                      |
| 4.20-4.30                        |                                                              | <input type="checkbox"/>                       |                                                   | <input type="checkbox"/>                                             | <input type="checkbox"/> | <input type="checkbox"/> | <input type="checkbox"/> | <input type="checkbox"/> | <input type="checkbox"/> | <input type="checkbox"/> |                                                                      |
| 4.30-4.40                        |                                                              | <input type="checkbox"/>                       |                                                   | <input type="checkbox"/>                                             | <input type="checkbox"/> | <input type="checkbox"/> | <input type="checkbox"/> | <input type="checkbox"/> | <input type="checkbox"/> | <input type="checkbox"/> |                                                                      |
| 4.40-4.50                        |                                                              | <input type="checkbox"/>                       |                                                   | <input type="checkbox"/>                                             | <input type="checkbox"/> | <input type="checkbox"/> | <input type="checkbox"/> | <input type="checkbox"/> | <input type="checkbox"/> | <input type="checkbox"/> |                                                                      |
| 4.50-5am                         |                                                              | <input type="checkbox"/>                       |                                                   | <input type="checkbox"/>                                             | <input type="checkbox"/> | <input type="checkbox"/> | <input type="checkbox"/> | <input type="checkbox"/> | <input type="checkbox"/> | <input type="checkbox"/> |                                                                      |
| 5am-5.10                         |                                                              | <input type="checkbox"/>                       |                                                   | <input type="checkbox"/>                                             | <input type="checkbox"/> | <input type="checkbox"/> | <input type="checkbox"/> | <input type="checkbox"/> | <input type="checkbox"/> | <input type="checkbox"/> |                                                                      |
| 5.10-5.20                        |                                                              | <input type="checkbox"/>                       |                                                   | <input type="checkbox"/>                                             | <input type="checkbox"/> | <input type="checkbox"/> | <input type="checkbox"/> | <input type="checkbox"/> | <input type="checkbox"/> | <input type="checkbox"/> |                                                                      |
| 5.20-5.30                        |                                                              | <input type="checkbox"/>                       |                                                   | <input type="checkbox"/>                                             | <input type="checkbox"/> | <input type="checkbox"/> | <input type="checkbox"/> | <input type="checkbox"/> | <input type="checkbox"/> | <input type="checkbox"/> |                                                                      |
| 5.30-5.40                        |                                                              | <input type="checkbox"/>                       |                                                   | <input type="checkbox"/>                                             | <input type="checkbox"/> | <input type="checkbox"/> | <input type="checkbox"/> | <input type="checkbox"/> | <input type="checkbox"/> | <input type="checkbox"/> |                                                                      |
| 5.40-5.50                        |                                                              | <input type="checkbox"/>                       |                                                   | <input type="checkbox"/>                                             | <input type="checkbox"/> | <input type="checkbox"/> | <input type="checkbox"/> | <input type="checkbox"/> | <input type="checkbox"/> | <input type="checkbox"/> |                                                                      |
| 5.50-6am                         |                                                              | <input type="checkbox"/>                       |                                                   | <input type="checkbox"/>                                             | <input type="checkbox"/> | <input type="checkbox"/> | <input type="checkbox"/> | <input type="checkbox"/> | <input type="checkbox"/> | <input type="checkbox"/> |                                                                      |
| 6am-6.10                         |                                                              | <input type="checkbox"/>                       |                                                   | <input type="checkbox"/>                                             | <input type="checkbox"/> | <input type="checkbox"/> | <input type="checkbox"/> | <input type="checkbox"/> | <input type="checkbox"/> | <input type="checkbox"/> |                                                                      |
| 6.10-6.20                        |                                                              | <input type="checkbox"/>                       |                                                   | <input type="checkbox"/>                                             | <input type="checkbox"/> | <input type="checkbox"/> | <input type="checkbox"/> | <input type="checkbox"/> | <input type="checkbox"/> | <input type="checkbox"/> |                                                                      |
| 6.20-6.30                        |                                                              | <input type="checkbox"/>                       |                                                   | <input type="checkbox"/>                                             | <input type="checkbox"/> | <input type="checkbox"/> | <input type="checkbox"/> | <input type="checkbox"/> | <input type="checkbox"/> | <input type="checkbox"/> |                                                                      |
| 6.30-6.40                        |                                                              | <input type="checkbox"/>                       |                                                   | <input type="checkbox"/>                                             | <input type="checkbox"/> | <input type="checkbox"/> | <input type="checkbox"/> | <input type="checkbox"/> | <input type="checkbox"/> | <input type="checkbox"/> |                                                                      |
| 6.40-6.50                        |                                                              | <input type="checkbox"/>                       |                                                   | <input type="checkbox"/>                                             | <input type="checkbox"/> | <input type="checkbox"/> | <input type="checkbox"/> | <input type="checkbox"/> | <input type="checkbox"/> | <input type="checkbox"/> |                                                                      |
| 6.50-7am                         |                                                              | <input type="checkbox"/>                       |                                                   | <input type="checkbox"/>                                             | <input type="checkbox"/> | <input type="checkbox"/> | <input type="checkbox"/> | <input type="checkbox"/> | <input type="checkbox"/> | <input type="checkbox"/> |                                                                      |

1  
2  
3  
4  
5  
6  
7  
8  
9  
10  
11  
12  
13  
14  
15  
16  
17  
18  
19  
20  
21  
22  
23  
24  
25  
26  
27  
28  
29  
30  
31  
32  
33  
34  
35  
36  
37  
38  
39  
40  
41  
42  
43  
44  
45  
46  
47  
48  
49  
50  
51  
52  
53  
54  
55  
56  
57  
58  
59  
60

| Time: 7am – 10am Morning       |                                                              | Time: 7am – 10am                                                   |                                                | Were you alone or with somebody you know?<br>Mark all relevant boxes |                          |                          |                          |                          |                          |                          | How much did you enjoy this time?<br>1 = not at all<br>7 = very much |
|--------------------------------|--------------------------------------------------------------|--------------------------------------------------------------------|------------------------------------------------|----------------------------------------------------------------------|--------------------------|--------------------------|--------------------------|--------------------------|--------------------------|--------------------------|----------------------------------------------------------------------|
|                                |                                                              |                                                                    |                                                | People who live with you                                             |                          |                          |                          |                          |                          |                          |                                                                      |
| Time:<br>7am-10am Morning (am) | What were you doing?<br>Please write down one main activity. | Did you use something else at the same time, what else did you do? | Did you use a smartphone, tablet, or computer? | Where were you?<br>Location, or mode of transport                    | Spouse / partner         | Mother                   | Father                   | Child aged 0-7           | Other person             | Others you know          |                                                                      |
| 7am-7.10                       |                                                              |                                                                    | <input type="checkbox"/>                       |                                                                      | <input type="checkbox"/> |                                                                      |
| 7.10-7.20                      |                                                              |                                                                    | <input type="checkbox"/>                       |                                                                      | <input type="checkbox"/> |                                                                      |
| 7.20-7.30                      |                                                              |                                                                    | <input type="checkbox"/>                       |                                                                      | <input type="checkbox"/> |                                                                      |
| 7.30-7.40                      |                                                              |                                                                    | <input type="checkbox"/>                       |                                                                      | <input type="checkbox"/> |                                                                      |
| 7.40-7.50                      |                                                              |                                                                    | <input type="checkbox"/>                       |                                                                      | <input type="checkbox"/> |                                                                      |
| 7.50-8am                       |                                                              |                                                                    | <input type="checkbox"/>                       |                                                                      | <input type="checkbox"/> |                                                                      |
| 8am-8.10                       |                                                              |                                                                    | <input type="checkbox"/>                       |                                                                      | <input type="checkbox"/> |                                                                      |
| 8.10-8.20                      |                                                              |                                                                    | <input type="checkbox"/>                       |                                                                      | <input type="checkbox"/> |                                                                      |
| 8.20-8.30                      |                                                              |                                                                    | <input type="checkbox"/>                       |                                                                      | <input type="checkbox"/> |                                                                      |
| 8.30-8.40                      |                                                              |                                                                    | <input type="checkbox"/>                       |                                                                      | <input type="checkbox"/> |                                                                      |
| 8.40-8.50                      |                                                              |                                                                    | <input type="checkbox"/>                       |                                                                      | <input type="checkbox"/> |                                                                      |
| 8.50-9am                       |                                                              |                                                                    | <input type="checkbox"/>                       |                                                                      | <input type="checkbox"/> |                                                                      |
| 9am-9.10                       |                                                              |                                                                    | <input type="checkbox"/>                       |                                                                      | <input type="checkbox"/> |                                                                      |
| 9.10-9.20                      |                                                              |                                                                    | <input type="checkbox"/>                       |                                                                      | <input type="checkbox"/> |                                                                      |
| 9.20-9.30                      |                                                              |                                                                    | <input type="checkbox"/>                       |                                                                      | <input type="checkbox"/> |                                                                      |
| 9.30-9.40                      |                                                              |                                                                    | <input type="checkbox"/>                       |                                                                      | <input type="checkbox"/> |                                                                      |
| 9.40-9.50                      |                                                              |                                                                    | <input type="checkbox"/>                       |                                                                      | <input type="checkbox"/> |                                                                      |
| 9.50-10am                      |                                                              |                                                                    | <input type="checkbox"/>                       |                                                                      | <input type="checkbox"/> |                                                                      |

1  
2  
3  
4  
5  
6  
7  
8  
9  
10  
11  
12  
13  
14  
15  
16  
17  
18  
19  
20  
21  
22  
23  
24  
25  
26  
27  
28  
29  
30  
31  
32  
33  
34  
35  
36  
37  
38  
39  
40  
41  
42  
43  
44  
45  
46  
47  
48  
49  
50  
51  
52  
53  
54  
55  
56  
57  
58  
59  
60

| Time: 10am – 1pm<br>Late morning / early afternoon | Time: 10am – 1pm                                             |                                                                                                                     | Were you alone or with somebody you know?<br>Mark all relevant boxes |                          |                          |                          |                          |                          |                          | How much did you enjoy this time?<br>1 = not at all<br>7 = very much |                 |
|----------------------------------------------------|--------------------------------------------------------------|---------------------------------------------------------------------------------------------------------------------|----------------------------------------------------------------------|--------------------------|--------------------------|--------------------------|--------------------------|--------------------------|--------------------------|----------------------------------------------------------------------|-----------------|
|                                                    | What were you doing?<br>Please write down one main activity. | Did you use a smartphone, tablet, or computer?<br>If you did something else at the same time, what else did you do? | Where were you?<br>Location, or mode of transport                    | Alone                    | Spouse / partner         | Mother                   | Father                   | Child aged 0-7           | Other person             |                                                                      | Others you know |
| 10am-10.10                                         |                                                              | <input type="checkbox"/>                                                                                            |                                                                      | <input type="checkbox"/>                                             |                 |
| 10.10-10.20                                        |                                                              | <input type="checkbox"/>                                                                                            |                                                                      | <input type="checkbox"/>                                             |                 |
| 10.20-10.30                                        |                                                              | <input type="checkbox"/>                                                                                            |                                                                      | <input type="checkbox"/>                                             |                 |
| 10.30-10.40                                        |                                                              | <input type="checkbox"/>                                                                                            |                                                                      | <input type="checkbox"/>                                             |                 |
| 10.40-10.50                                        |                                                              | <input type="checkbox"/>                                                                                            |                                                                      | <input type="checkbox"/>                                             |                 |
| 10.50-11am                                         |                                                              | <input type="checkbox"/>                                                                                            |                                                                      | <input type="checkbox"/>                                             |                 |
| 11am-11.10                                         |                                                              | <input type="checkbox"/>                                                                                            |                                                                      | <input type="checkbox"/>                                             |                 |
| 11.10-11.20                                        |                                                              | <input type="checkbox"/>                                                                                            |                                                                      | <input type="checkbox"/>                                             |                 |
| 11.20-11.30                                        |                                                              | <input type="checkbox"/>                                                                                            |                                                                      | <input type="checkbox"/>                                             |                 |
| 11.30-11.40                                        |                                                              | <input type="checkbox"/>                                                                                            |                                                                      | <input type="checkbox"/>                                             |                 |
| 11.40-11.50                                        |                                                              | <input type="checkbox"/>                                                                                            |                                                                      | <input type="checkbox"/>                                             |                 |
| 11.50-12pm                                         |                                                              | <input type="checkbox"/>                                                                                            |                                                                      | <input type="checkbox"/>                                             |                 |
| 12pm-12.10                                         |                                                              | <input type="checkbox"/>                                                                                            |                                                                      | <input type="checkbox"/>                                             |                 |
| 12.10-12.20                                        |                                                              | <input type="checkbox"/>                                                                                            |                                                                      | <input type="checkbox"/>                                             |                 |
| 12.20-12.30                                        |                                                              | <input type="checkbox"/>                                                                                            |                                                                      | <input type="checkbox"/>                                             |                 |
| 12.30-12.40                                        |                                                              | <input type="checkbox"/>                                                                                            |                                                                      | <input type="checkbox"/>                                             |                 |
| 12.40-12.50                                        |                                                              | <input type="checkbox"/>                                                                                            |                                                                      | <input type="checkbox"/>                                             |                 |
| 12.50-1pm                                          |                                                              | <input type="checkbox"/>                                                                                            |                                                                      | <input type="checkbox"/>                                             |                 |

1  
2  
3  
4  
5  
6  
7  
8  
9  
10  
11  
12  
13  
14  
15  
16  
17  
18  
19  
20  
21  
22  
23  
24  
25  
26  
27  
28  
29  
30  
31  
32  
33  
34  
35  
36  
37  
38  
39  
40  
41  
42  
43  
44  
45  
46  
47  
48  
49  
50  
51  
52  
53  
54  
55  
56  
57  
58  
59  
60

| Time: 1pm - 4pm Afternoon    |                                                              | Time: 1pm - 4pm                                                                                                     |                                                   | Were you alone or with somebody you know?<br>Mark all relevant boxes |                          |                          |                          |                          |                          |  | How much did you enjoy this time?<br>1 = not at all<br>7 = very much |
|------------------------------|--------------------------------------------------------------|---------------------------------------------------------------------------------------------------------------------|---------------------------------------------------|----------------------------------------------------------------------|--------------------------|--------------------------|--------------------------|--------------------------|--------------------------|--|----------------------------------------------------------------------|
|                              |                                                              |                                                                                                                     |                                                   | People who live with you                                             |                          |                          |                          |                          |                          |  |                                                                      |
| Time: 1pm-4pm Afternoon (pm) | What were you doing?<br>Please write down one main activity. | Did you use a smartphone, tablet, or computer?<br>If you did something else at the same time, what else did you do? | Where were you?<br>Location, or mode of transport | Spouse / partner                                                     | Mother                   | Father                   | Child aged 0-7           | Other person             | Others you know          |  |                                                                      |
| 1pm-1:10                     |                                                              | <input type="checkbox"/>                                                                                            |                                                   | <input type="checkbox"/>                                             | <input type="checkbox"/> | <input type="checkbox"/> | <input type="checkbox"/> | <input type="checkbox"/> | <input type="checkbox"/> |  |                                                                      |
| 1:10-1:20                    |                                                              | <input type="checkbox"/>                                                                                            |                                                   | <input type="checkbox"/>                                             | <input type="checkbox"/> | <input type="checkbox"/> | <input type="checkbox"/> | <input type="checkbox"/> | <input type="checkbox"/> |  |                                                                      |
| 1:20-1:30                    |                                                              | <input type="checkbox"/>                                                                                            |                                                   | <input type="checkbox"/>                                             | <input type="checkbox"/> | <input type="checkbox"/> | <input type="checkbox"/> | <input type="checkbox"/> | <input type="checkbox"/> |  |                                                                      |
| 1:30-1:40                    |                                                              | <input type="checkbox"/>                                                                                            |                                                   | <input type="checkbox"/>                                             | <input type="checkbox"/> | <input type="checkbox"/> | <input type="checkbox"/> | <input type="checkbox"/> | <input type="checkbox"/> |  |                                                                      |
| 1:40-1:50                    |                                                              | <input type="checkbox"/>                                                                                            |                                                   | <input type="checkbox"/>                                             | <input type="checkbox"/> | <input type="checkbox"/> | <input type="checkbox"/> | <input type="checkbox"/> | <input type="checkbox"/> |  |                                                                      |
| 1:50-2pm                     |                                                              | <input type="checkbox"/>                                                                                            |                                                   | <input type="checkbox"/>                                             | <input type="checkbox"/> | <input type="checkbox"/> | <input type="checkbox"/> | <input type="checkbox"/> | <input type="checkbox"/> |  |                                                                      |
| 2pm-2:10                     |                                                              | <input type="checkbox"/>                                                                                            |                                                   | <input type="checkbox"/>                                             | <input type="checkbox"/> | <input type="checkbox"/> | <input type="checkbox"/> | <input type="checkbox"/> | <input type="checkbox"/> |  |                                                                      |
| 2:10-2:20                    |                                                              | <input type="checkbox"/>                                                                                            |                                                   | <input type="checkbox"/>                                             | <input type="checkbox"/> | <input type="checkbox"/> | <input type="checkbox"/> | <input type="checkbox"/> | <input type="checkbox"/> |  |                                                                      |
| 2:20-2:30                    |                                                              | <input type="checkbox"/>                                                                                            |                                                   | <input type="checkbox"/>                                             | <input type="checkbox"/> | <input type="checkbox"/> | <input type="checkbox"/> | <input type="checkbox"/> | <input type="checkbox"/> |  |                                                                      |
| 2:30-2:40                    |                                                              | <input type="checkbox"/>                                                                                            |                                                   | <input type="checkbox"/>                                             | <input type="checkbox"/> | <input type="checkbox"/> | <input type="checkbox"/> | <input type="checkbox"/> | <input type="checkbox"/> |  |                                                                      |
| 2:40-2:50                    |                                                              | <input type="checkbox"/>                                                                                            |                                                   | <input type="checkbox"/>                                             | <input type="checkbox"/> | <input type="checkbox"/> | <input type="checkbox"/> | <input type="checkbox"/> | <input type="checkbox"/> |  |                                                                      |
| 2:50-3pm                     |                                                              | <input type="checkbox"/>                                                                                            |                                                   | <input type="checkbox"/>                                             | <input type="checkbox"/> | <input type="checkbox"/> | <input type="checkbox"/> | <input type="checkbox"/> | <input type="checkbox"/> |  |                                                                      |
| 3pm-3:10                     |                                                              | <input type="checkbox"/>                                                                                            |                                                   | <input type="checkbox"/>                                             | <input type="checkbox"/> | <input type="checkbox"/> | <input type="checkbox"/> | <input type="checkbox"/> | <input type="checkbox"/> |  |                                                                      |
| 3:10-3:20                    |                                                              | <input type="checkbox"/>                                                                                            |                                                   | <input type="checkbox"/>                                             | <input type="checkbox"/> | <input type="checkbox"/> | <input type="checkbox"/> | <input type="checkbox"/> | <input type="checkbox"/> |  |                                                                      |
| 3:20-3:30                    |                                                              | <input type="checkbox"/>                                                                                            |                                                   | <input type="checkbox"/>                                             | <input type="checkbox"/> | <input type="checkbox"/> | <input type="checkbox"/> | <input type="checkbox"/> | <input type="checkbox"/> |  |                                                                      |
| 3:30-3:40                    |                                                              | <input type="checkbox"/>                                                                                            |                                                   | <input type="checkbox"/>                                             | <input type="checkbox"/> | <input type="checkbox"/> | <input type="checkbox"/> | <input type="checkbox"/> | <input type="checkbox"/> |  |                                                                      |
| 3:40-3:50                    |                                                              | <input type="checkbox"/>                                                                                            |                                                   | <input type="checkbox"/>                                             | <input type="checkbox"/> | <input type="checkbox"/> | <input type="checkbox"/> | <input type="checkbox"/> | <input type="checkbox"/> |  |                                                                      |
| 3:50-4pm                     |                                                              | <input type="checkbox"/>                                                                                            |                                                   | <input type="checkbox"/>                                             | <input type="checkbox"/> | <input type="checkbox"/> | <input type="checkbox"/> | <input type="checkbox"/> | <input type="checkbox"/> |  |                                                                      |

1  
2  
3  
4  
5  
6  
7  
8  
9  
10  
11  
12  
13  
14  
15  
16  
17  
18  
19  
20  
21  
22  
23  
24  
25  
26  
27  
28  
29  
30  
31  
32  
33  
34  
35  
36  
37  
38  
39  
40  
41  
42  
43  
44  
45  
46  
47  
48  
49  
50  
51  
52  
53  
54  
55  
56  
57  
58  
59  
60

| Time: 4pm – 7pm<br>Late afternoon / early evening |                                                              | Time: 4pm – 7pm                                |                                                   | Were you alone or with somebody you know?<br>Mark all relevant boxes |                          |                          |                          |                          |                          |                          | How much did you enjoy this time?<br>1 = not at all<br>7 = very much |  |  |
|---------------------------------------------------|--------------------------------------------------------------|------------------------------------------------|---------------------------------------------------|----------------------------------------------------------------------|--------------------------|--------------------------|--------------------------|--------------------------|--------------------------|--------------------------|----------------------------------------------------------------------|--|--|
| Time:<br>4pm–7pm<br>Afternoon / evening (pm)      | What were you doing?<br>Please write down one main activity. | Did you use a smartphone, tablet, or computer? | Where were you?<br>Location, or mode of transport | Spouse / partner                                                     | Mother                   | Father                   | Child aged 0-7           | Other person             | Others you know          |                          |                                                                      |  |  |
| 4pm-4.10                                          |                                                              | <input type="checkbox"/>                       |                                                   | <input type="checkbox"/>                                             | <input type="checkbox"/> | <input type="checkbox"/> | <input type="checkbox"/> | <input type="checkbox"/> | <input type="checkbox"/> | <input type="checkbox"/> |                                                                      |  |  |
| 4.10-4.20                                         |                                                              | <input type="checkbox"/>                       |                                                   | <input type="checkbox"/>                                             | <input type="checkbox"/> | <input type="checkbox"/> | <input type="checkbox"/> | <input type="checkbox"/> | <input type="checkbox"/> | <input type="checkbox"/> |                                                                      |  |  |
| 4.20-4.30                                         |                                                              | <input type="checkbox"/>                       |                                                   | <input type="checkbox"/>                                             | <input type="checkbox"/> | <input type="checkbox"/> | <input type="checkbox"/> | <input type="checkbox"/> | <input type="checkbox"/> | <input type="checkbox"/> |                                                                      |  |  |
| 4.30-4.40                                         |                                                              | <input type="checkbox"/>                       |                                                   | <input type="checkbox"/>                                             | <input type="checkbox"/> | <input type="checkbox"/> | <input type="checkbox"/> | <input type="checkbox"/> | <input type="checkbox"/> | <input type="checkbox"/> |                                                                      |  |  |
| 4.40-4.50                                         |                                                              | <input type="checkbox"/>                       |                                                   | <input type="checkbox"/>                                             | <input type="checkbox"/> | <input type="checkbox"/> | <input type="checkbox"/> | <input type="checkbox"/> | <input type="checkbox"/> | <input type="checkbox"/> |                                                                      |  |  |
| 4.50-5pm                                          |                                                              | <input type="checkbox"/>                       |                                                   | <input type="checkbox"/>                                             | <input type="checkbox"/> | <input type="checkbox"/> | <input type="checkbox"/> | <input type="checkbox"/> | <input type="checkbox"/> | <input type="checkbox"/> |                                                                      |  |  |
| 5pm-5.10                                          |                                                              | <input type="checkbox"/>                       |                                                   | <input type="checkbox"/>                                             | <input type="checkbox"/> | <input type="checkbox"/> | <input type="checkbox"/> | <input type="checkbox"/> | <input type="checkbox"/> | <input type="checkbox"/> |                                                                      |  |  |
| 5.10-5.20                                         |                                                              | <input type="checkbox"/>                       |                                                   | <input type="checkbox"/>                                             | <input type="checkbox"/> | <input type="checkbox"/> | <input type="checkbox"/> | <input type="checkbox"/> | <input type="checkbox"/> | <input type="checkbox"/> |                                                                      |  |  |
| 5.20-5.30                                         |                                                              | <input type="checkbox"/>                       |                                                   | <input type="checkbox"/>                                             | <input type="checkbox"/> | <input type="checkbox"/> | <input type="checkbox"/> | <input type="checkbox"/> | <input type="checkbox"/> | <input type="checkbox"/> |                                                                      |  |  |
| 5.30-5.40                                         |                                                              | <input type="checkbox"/>                       |                                                   | <input type="checkbox"/>                                             | <input type="checkbox"/> | <input type="checkbox"/> | <input type="checkbox"/> | <input type="checkbox"/> | <input type="checkbox"/> | <input type="checkbox"/> |                                                                      |  |  |
| 5.40-5.50                                         |                                                              | <input type="checkbox"/>                       |                                                   | <input type="checkbox"/>                                             | <input type="checkbox"/> | <input type="checkbox"/> | <input type="checkbox"/> | <input type="checkbox"/> | <input type="checkbox"/> | <input type="checkbox"/> |                                                                      |  |  |
| 5.50-6pm                                          |                                                              | <input type="checkbox"/>                       |                                                   | <input type="checkbox"/>                                             | <input type="checkbox"/> | <input type="checkbox"/> | <input type="checkbox"/> | <input type="checkbox"/> | <input type="checkbox"/> | <input type="checkbox"/> |                                                                      |  |  |
| 6pm-6.10                                          |                                                              | <input type="checkbox"/>                       |                                                   | <input type="checkbox"/>                                             | <input type="checkbox"/> | <input type="checkbox"/> | <input type="checkbox"/> | <input type="checkbox"/> | <input type="checkbox"/> | <input type="checkbox"/> |                                                                      |  |  |
| 6.10-6.20                                         |                                                              | <input type="checkbox"/>                       |                                                   | <input type="checkbox"/>                                             | <input type="checkbox"/> | <input type="checkbox"/> | <input type="checkbox"/> | <input type="checkbox"/> | <input type="checkbox"/> | <input type="checkbox"/> |                                                                      |  |  |
| 6.20-6.30                                         |                                                              | <input type="checkbox"/>                       |                                                   | <input type="checkbox"/>                                             | <input type="checkbox"/> | <input type="checkbox"/> | <input type="checkbox"/> | <input type="checkbox"/> | <input type="checkbox"/> | <input type="checkbox"/> |                                                                      |  |  |
| 6.30-6.40                                         |                                                              | <input type="checkbox"/>                       |                                                   | <input type="checkbox"/>                                             | <input type="checkbox"/> | <input type="checkbox"/> | <input type="checkbox"/> | <input type="checkbox"/> | <input type="checkbox"/> | <input type="checkbox"/> |                                                                      |  |  |
| 6.40-6.50                                         |                                                              | <input type="checkbox"/>                       |                                                   | <input type="checkbox"/>                                             | <input type="checkbox"/> | <input type="checkbox"/> | <input type="checkbox"/> | <input type="checkbox"/> | <input type="checkbox"/> | <input type="checkbox"/> |                                                                      |  |  |
| 6.50-7pm                                          |                                                              | <input type="checkbox"/>                       |                                                   | <input type="checkbox"/>                                             | <input type="checkbox"/> | <input type="checkbox"/> | <input type="checkbox"/> | <input type="checkbox"/> | <input type="checkbox"/> | <input type="checkbox"/> |                                                                      |  |  |

1  
2  
3  
4  
5  
6  
7  
8  
9  
10  
11  
12  
13  
14  
15  
16  
17  
18  
19  
20  
21  
22  
23  
24  
25  
26  
27  
28  
29  
30  
31  
32  
33  
34  
35  
36  
37  
38  
39  
40  
41  
42  
43  
44  
45  
46  
47  
48  
49  
50  
51  
52  
53  
54  
55  
56  
57  
58  
59  
60

| Time: 7pm – 10pm Evening          |                                                              | Time: 7pm – 10pm                               |                                                   | Were you alone or with somebody you know?<br>Mark all relevant boxes |                          |                          |                          |                          |                          |  | How much did you enjoy this time?<br>1 = not at all<br>7 = very much |
|-----------------------------------|--------------------------------------------------------------|------------------------------------------------|---------------------------------------------------|----------------------------------------------------------------------|--------------------------|--------------------------|--------------------------|--------------------------|--------------------------|--|----------------------------------------------------------------------|
|                                   |                                                              |                                                |                                                   | People who live with you                                             |                          |                          |                          |                          |                          |  |                                                                      |
| Time:<br>7pm-10pm<br>Evening (pm) | What were you doing?<br>Please write down one main activity. | Did you use a smartphone, tablet, or computer? | Where were you?<br>Location, or mode of transport | Spouse / partner                                                     | Mother                   | Father                   | Child aged 0-7           | Other person             | Others you know          |  |                                                                      |
| 7pm-7.10                          |                                                              | <input type="checkbox"/>                       |                                                   | <input type="checkbox"/>                                             | <input type="checkbox"/> | <input type="checkbox"/> | <input type="checkbox"/> | <input type="checkbox"/> | <input type="checkbox"/> |  |                                                                      |
| 7.10-7.20                         |                                                              | <input type="checkbox"/>                       |                                                   | <input type="checkbox"/>                                             | <input type="checkbox"/> | <input type="checkbox"/> | <input type="checkbox"/> | <input type="checkbox"/> | <input type="checkbox"/> |  |                                                                      |
| 7.20-7.30                         |                                                              | <input type="checkbox"/>                       |                                                   | <input type="checkbox"/>                                             | <input type="checkbox"/> | <input type="checkbox"/> | <input type="checkbox"/> | <input type="checkbox"/> | <input type="checkbox"/> |  |                                                                      |
| 7.30-7.40                         |                                                              | <input type="checkbox"/>                       |                                                   | <input type="checkbox"/>                                             | <input type="checkbox"/> | <input type="checkbox"/> | <input type="checkbox"/> | <input type="checkbox"/> | <input type="checkbox"/> |  |                                                                      |
| 7.40-7.50                         |                                                              | <input type="checkbox"/>                       |                                                   | <input type="checkbox"/>                                             | <input type="checkbox"/> | <input type="checkbox"/> | <input type="checkbox"/> | <input type="checkbox"/> | <input type="checkbox"/> |  |                                                                      |
| 7.50-8pm                          |                                                              | <input type="checkbox"/>                       |                                                   | <input type="checkbox"/>                                             | <input type="checkbox"/> | <input type="checkbox"/> | <input type="checkbox"/> | <input type="checkbox"/> | <input type="checkbox"/> |  |                                                                      |
| 8pm-8.10                          |                                                              | <input type="checkbox"/>                       |                                                   | <input type="checkbox"/>                                             | <input type="checkbox"/> | <input type="checkbox"/> | <input type="checkbox"/> | <input type="checkbox"/> | <input type="checkbox"/> |  |                                                                      |
| 8.10-8.20                         |                                                              | <input type="checkbox"/>                       |                                                   | <input type="checkbox"/>                                             | <input type="checkbox"/> | <input type="checkbox"/> | <input type="checkbox"/> | <input type="checkbox"/> | <input type="checkbox"/> |  |                                                                      |
| 8.20-8.30                         |                                                              | <input type="checkbox"/>                       |                                                   | <input type="checkbox"/>                                             | <input type="checkbox"/> | <input type="checkbox"/> | <input type="checkbox"/> | <input type="checkbox"/> | <input type="checkbox"/> |  |                                                                      |
| 8.30-8.40                         |                                                              | <input type="checkbox"/>                       |                                                   | <input type="checkbox"/>                                             | <input type="checkbox"/> | <input type="checkbox"/> | <input type="checkbox"/> | <input type="checkbox"/> | <input type="checkbox"/> |  |                                                                      |
| 8.40-8.50                         |                                                              | <input type="checkbox"/>                       |                                                   | <input type="checkbox"/>                                             | <input type="checkbox"/> | <input type="checkbox"/> | <input type="checkbox"/> | <input type="checkbox"/> | <input type="checkbox"/> |  |                                                                      |
| 8.50-9pm                          |                                                              | <input type="checkbox"/>                       |                                                   | <input type="checkbox"/>                                             | <input type="checkbox"/> | <input type="checkbox"/> | <input type="checkbox"/> | <input type="checkbox"/> | <input type="checkbox"/> |  |                                                                      |
| 9pm-9.10                          |                                                              | <input type="checkbox"/>                       |                                                   | <input type="checkbox"/>                                             | <input type="checkbox"/> | <input type="checkbox"/> | <input type="checkbox"/> | <input type="checkbox"/> | <input type="checkbox"/> |  |                                                                      |
| 9.10-9.20                         |                                                              | <input type="checkbox"/>                       |                                                   | <input type="checkbox"/>                                             | <input type="checkbox"/> | <input type="checkbox"/> | <input type="checkbox"/> | <input type="checkbox"/> | <input type="checkbox"/> |  |                                                                      |
| 9.20-9.30                         |                                                              | <input type="checkbox"/>                       |                                                   | <input type="checkbox"/>                                             | <input type="checkbox"/> | <input type="checkbox"/> | <input type="checkbox"/> | <input type="checkbox"/> | <input type="checkbox"/> |  |                                                                      |
| 9.30-9.40                         |                                                              | <input type="checkbox"/>                       |                                                   | <input type="checkbox"/>                                             | <input type="checkbox"/> | <input type="checkbox"/> | <input type="checkbox"/> | <input type="checkbox"/> | <input type="checkbox"/> |  |                                                                      |
| 9.40-9.50                         |                                                              | <input type="checkbox"/>                       |                                                   | <input type="checkbox"/>                                             | <input type="checkbox"/> | <input type="checkbox"/> | <input type="checkbox"/> | <input type="checkbox"/> | <input type="checkbox"/> |  |                                                                      |
| 9.50-10pm                         |                                                              | <input type="checkbox"/>                       |                                                   | <input type="checkbox"/>                                             | <input type="checkbox"/> | <input type="checkbox"/> | <input type="checkbox"/> | <input type="checkbox"/> | <input type="checkbox"/> |  |                                                                      |







## Diary Checklist

1. When did you fill in the diary ?
1. Now and then during the diary day
2. At the end of the diary day
3. The day after the diary day
2. Did you feel rushed this day?
1. Yes
2. No
3. Was this an ordinary or an unusual day?
1. An ordinary day
2. An unusual day
4. What kind of day was this day?
1. A workday
2. A school or college day
3. A day off
4. A sick leave day
5. An annual leave day
6. On leave for other reasons
7. None of the above

Please go through the diary again and check the following:

- Please check that you have noted only one main activity on each line and that there are no empty time periods.
- Have you marked clearly your employment working hours, even if you worked at home?
- Have you recorded all travel and modes of transport?
- Have you marked the duration of secondary activities, if any?
- Please check that you have always completed the 'Were you alone or with somebody you know' column.

1  
2  
3  
4  
5  
6  
7  
8  
9  
10  
11  
12  
13  
14  
15  
16  
17  
18  
19  
20  
21  
22  
23  
24  
25  
26  
27  
28  
29  
30  
31  
32  
33  
34  
35  
36  
37  
38  
39  
40  
41  
42  
43  
44  
45  
46  
47  
48  
49  
50  
51  
52  
53  
54  
55  
56  
57  
58  
59  
60

**Participant Information Questionnaire**

**Date:** \_\_\_\_\_

**\*Email:** \_\_\_\_\_

**Date of Birth:** \_\_\_\_\_ **Sex** : \_\_\_\_\_

**Health conditions:** \_\_\_\_\_

**List of medications being taken:** \_\_\_\_\_

**Length of time since diagnosis:** \_\_\_\_\_

1  
2  
3  
4  
5  
6  
7  
8  
9  
10  
11  
12  
13  
14

### What is your employment status?

- In paid employment  Unpaid work experience  
 Full-time student  Retired  
 Unemployed (not on leave)  On parental leave  
 Doing domestic work (homemaking, looking after the children etc.)  Other (specify)  
\_\_\_\_\_

15  
16  
17  
18  
19  
20  
21  
22

### Would you like to be contacted to receive feedback on the study?

- Yes  No

23  
24  
25  
26  
27  
28  
29  
30  
31

### Would you like to be contacted for future research?

- Yes  No

32  
33  
34  
35  
36  
37  
38  
39  
40  
41  
42  
43  
44  
45  
46  
47  
48  
49  
50  
51  
52  
53  
54  
55  
56  
57  
58  
59  
60

**\*Please note, all of the information in this questionnaire, including contact information, will only be used for research purposes and will not be passed on to third parties.**

### The Multimorbidity Illness Perceptions Scale (MULTIPLEs)

These questions are about the thoughts and feelings that people with multiple long-term conditions sometimes experience. Please indicate how much you agree with each statement by circling one number.

Strongly Disagree  $\longrightarrow$  Strongly Agree

|    |                                                                                                |   |   |   |   |
|----|------------------------------------------------------------------------------------------------|---|---|---|---|
| 1  | One of my conditions is more serious than the others.                                          | 0 | 1 | 2 | 3 |
| 2  | Time spent managing my conditions has made it more difficult to carry out my usual activities. | 0 | 1 | 2 | 3 |
| 3  | I feel so overwhelmed by the treatment for one condition it is hard to manage any others.      | 0 | 1 | 2 | 3 |
| 4  | The causes of my conditions are linked.                                                        | 0 | 1 | 2 | 3 |
| 5  | It is difficult to take all my medications the way I am supposed to.                           | 0 | 1 | 2 | 3 |
| 6  | Time spent managing my condition has limited my activities.                                    | 0 | 1 | 2 | 3 |
| 7  | One of my conditions is more worrying than the others.                                         | 0 | 1 | 2 | 3 |
| 8  | Taking different medications for each of my conditions has caused me problems.                 | 0 | 1 | 2 | 3 |
| 9  | I don't like mixing medications for different conditions.                                      | 0 | 1 | 2 | 3 |
| 10 | Having more than one condition makes my treatments less effective.                             | 0 | 1 | 2 | 3 |
| 11 | One of my conditions has caused another.                                                       | 0 | 1 | 2 | 3 |
| 12 | One of my conditions dominates the others.                                                     | 0 | 1 | 2 | 3 |
| 13 | My conditions interact with each other.                                                        | 0 | 1 | 2 | 3 |
| 14 | Having more than one condition makes it difficult to get the best available treatment.         | 0 | 1 | 2 | 3 |
| 15 | Time spent managing my conditions has reduced my social life.                                  | 0 | 1 | 2 | 3 |
| 16 | One of my conditions has more of an impact on my life.                                         | 0 | 1 | 2 | 3 |

Strongly Disagree  $\longrightarrow$  Strongly Agree

|    |                                                                   |   |   |   |   |   |   |
|----|-------------------------------------------------------------------|---|---|---|---|---|---|
| 17 | Having more than one condition makes me unhappy.                  | 0 | 1 | 2 | 3 | 4 | 5 |
| 18 | Having more than one condition makes me more anxious.             | 0 | 1 | 2 | 3 | 4 | 5 |
| 19 | Having more than one condition makes me angry or frustrated.      | 0 | 1 | 2 | 3 | 4 | 5 |
| 20 | Having more than one health problem makes me feel sad.            | 0 | 1 | 2 | 3 | 4 | 5 |
| 21 | Having more than one condition makes me more irritable.           | 0 | 1 | 2 | 3 | 4 | 5 |
| 22 | If I feel sad or depressed, managing my conditions is a struggle. | 0 | 1 | 2 | 3 | 4 | 5 |

## PARTICIPANT EXPERIENCE SURVEY

### EDESIX BODY CAMERA

| <i>Did you experience any of the following problems while you were wearing the camera?</i> | Never | Some-times | Often | Always |
|--------------------------------------------------------------------------------------------|-------|------------|-------|--------|
| Forgetting to wear the camera                                                              |       |            |       |        |
| People’s reaction to me wearing the camera                                                 |       |            |       |        |
| Discomfort wearing the camera                                                              |       |            |       |        |
| Problems with the camera slipping/moving about                                             |       |            |       |        |
| Difficulty understanding the camera instructions                                           |       |            |       |        |
| Frustration with the length of time I had to wear the camera                               |       |            |       |        |
| Being uncertain about whether the camera was turned on                                     |       |            |       |        |

Do you have any additional comments about your experience of wearing the camera?

---



---



---



---

For peer review only

1  
2  
3  
4  
5  
6  
7  
8  
9  
10  
11  
12  
13  
14  
15  
16  
17  
18  
19  
20  
21  
22  
23  
24  
25  
26  
27  
28  
29  
30  
31  
32  
33  
34  
35  
36  
37  
38  
39  
40  
41  
42  
43  
44  
45  
46  
47

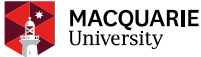

1  
2  
3  
4  
5  
6  
7  
8  
9  
10  
11  
12  
13  
14  
15  
16  
17  
18  
19  
20  
21  
22  
23  
24  
25  
26  
27  
28  
29  
30  
31  
32  
33  
34  
35  
36  
37  
38  
39  
40  
41  
42  
43  
44  
45  
46  
47

**TIME USE DIARY**

| <i>Did you experience any of these problems when completing the diary?</i> | Never | Some-times | Often | Always |
|----------------------------------------------------------------------------|-------|------------|-------|--------|
| Remembering to fill in the diary                                           |       |            |       |        |
| Forgetting what I did during the day/evening                               |       |            |       |        |
| The length of time it took to complete the diary                           |       |            |       |        |
| Completing all sections of the diary                                       |       |            |       |        |
| Understanding the diary instructions                                       |       |            |       |        |

Do you have any additional comments about your experience of completing the time use diary?

---



---



---



---

**PARTICIPATING IN THE STUDY**

Were there any aspects of the study that you particularly enjoyed?

---

---

Were there any aspects of the study that you disliked?

---

---

How did you find the 'reconstruction interview' experience?

---

---

What motivated you to participate in the study?

---

---

---

Do you have any other comments or suggestions?

---

---

---

Centre for Health Informatics  
Australian Institute of Health Innovation  
Faculty of Medicine and Health Sciences  
MACQUARIE UNIVERSITY NSW 2109  
Phone: +61 (2) 9850 2436  
Email: annie.lau@mq.edu.au

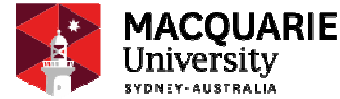

Chief Investigator's Name & Title: Dr Annie Lau

## Participant Information and Consent Form

### Name of Project

Analysis of patient work conducted by patients with type 2 diabetes and multiple comorbidities.

### Project Information

You are invited to participate in an observational study of the 'patient work' involved in self-managing type 2 diabetes and other conditions, using a combination of time-use diaries, a physical activity tracker, and a body camera.

The purpose of the study is to investigate the extra health-related work you undertake to accommodate your health conditions, such as taking medications, preparing meals, or making time to see doctors. We want to gain a better understanding of the daily routines of those living with type 2 diabetes and other health conditions, so that we can understand how to integrate healthcare interventions more seamlessly into our daily lives in order to improve health outcomes.

The study is being conducted by Dr Annie Lau (Ph 02 9850 2436 annie.lau@mq.edu.au), Dr Kathleen Yin (Ph 02 9850 2477 kathleen.yin@mq.edu.au), Prof Enrico Coiera (Ph 02 9850 2403), Dr Liliana Laranjo (Ph 02 9850 2426), A/Prof Kenneth Ho, Mr Wen Jun Liang (Bachelor of Engineering), Mr Joshua Hadrill (Bachelor of Engineering), Ms Isabelle Barnes (Bachelor of Clinical Science), Mr Joshua Jung (Bachelor of Clinical Science), Mr Christian Tran (Bachelor of Commerce and Arts), and Mr Jiawei he (Bachelor of Commerce and Arts) from Macquarie University's Australian Institute of Health Innovation, Dr Sanjot Vagholkar from MQ Health General Practice, and Dr Teresa Harms and Prof Jonathan Gershuny from the University of Oxford (UK).

You will be given a \$60 shopping voucher as our appreciation for taking part in this study.

Participants are required to be consenting adults who:

- are able to speak, write and read in English;
- are aged 18 years and older;
- are diagnosed with type 2 diabetes and at least one more chronic health condition;
- are willing to fill in a Time-Use Diary for one day; and
- agree to wear the Edesix body camera on their person for one day.



If you decide to participate, you will be asked to complete three tasks:

- **Task 1 - Pre-study briefing session:** Attend a pre-study briefing session at Macquarie University, or a place of your choice (e.g. your home), where you will be given information about the study, asked to provide written consent if you are willing to participate, and complete two questionnaires about your personal information and your health (approximately 5-10 minutes each).

Afterwards, we will conduct an interview with you to better understand your health condition and existing patient work. This interview will be audio recorded for future analysis. You can terminate the interview at any point you want.

With your permission, we will take photos of your surroundings and the tools you use to manage your health (e.g. medications, devices, home environment).

Lastly, we will provide you with two pieces of equipment (Edesix camera and time-use diary), and show you how to use them for the second task of data collection. We will also provide you an explanation card where you can show it to members of the public who are enquiring about the study.

- **Task 2 - Data collection:** After the briefing session, you will be asked to wear the Edesix body camera during the waking hours of one (1) day, which will take video recordings of your daily activities for approximately 8 to 14 hours. No audio will be recorded.

We will also ask you to complete the time-use diary over the same day for 24 hours.

You have the right to remove the camera at any time.

(Please note: The Edesix body camera is encrypted to ensure your data is protected.

You are recommended to turn off the body camera during situations when anyone (including yourself) is dressing or undressing, using the bathroom or showers, or during any situations where privacy or recording is of concern.

Should you feel unsafe due to the presence of the body camera at any stage of the study, you should always prioritise your own personal safety and comfort above the study's requirements.)

- **Task 3 - Post-study debriefing session:** Immediately after the data collection day, we will ask you to attend a 1-hour post-study session at Macquarie University, or a place of your choice, where we will go through the videos together and conduct a debriefing session with you.

Please bring the two pieces of equipment with you on the day (Edesix camera and Time-Use Diary).

The video footage will be converted to images, and you will first view the images alone. You have the right to delete any (or all) of the images before the interview.

An interview (about 30-40 minute in length) will be conducted where the research team will ask you to describe your day, with assistance from the images. This interview will be audio recorded for future analysis, and you can terminate it at any point you want.

You will be asked to answer one (1) paper-based questionnaire about your experience during the study day (~10 minutes to answer).

### Your confidentiality

Any information or personal details gathered in the course of the study are confidential, except as required by law. No individual will be identified in any publication or presentation of the results.

Only members of the research team will have access of the data. None of your video or photo images will be released to the public. In cases when we need to use video or photo images in publications or presentations, we will seek your permission first, and images will be blurred such that no one is identifiable.

The study data will be kept for a minimum of 5 years from the most recent publication date and will be safely stored on a password-protected computer locked in the study centre.

By signing this form, you are also consenting to the potential use of this data in future research, however the Macquarie University Human Research Ethics Committee must first approve any such future research before any of your data is used. The results of the study will be published in peer-reviewed journals and may be presented at scientific conferences.

Participation in this study is entirely voluntary: you are not obliged to participate and if you decide to participate, you are free to withdraw at any time without having to give a reason and without consequence.

Your participation in this study will not affect your relationship with Macquarie University, nor the clinical care you receive at the MQ Health General Practice Unit.

**INVESTIGATOR/PARTICIPANT'S COPY**

I, \_\_\_\_\_ have read (*or, where appropriate, have had read to me*) and understand the information above and any questions I have asked were answered to my satisfaction. I agree to participate in this research, knowing that I can withdraw from further participation in the research at any time without consequence. I have been given a copy of this form to keep.

I **consent / do not consent** (*circle one*) for the research team to use my de-identified photos and video images in publications and presentations, provided that the persons in the images cannot be identified.

Participant's Name: \_\_\_\_\_  
(Block letters)

Participant's Signature: \_\_\_\_\_ Date: \_\_\_\_\_

Investigator's Name: \_\_\_\_\_  
(Block letters)

Investigator's Signature: \_\_\_\_\_ Date: \_\_\_\_\_

The ethical aspects of this study have been approved by the Macquarie University Human Research Ethics Committee. If you have any complaints or reservations about any ethical aspect of your participation in this research, you may contact the Committee through the Director, Research Ethics & Integrity (telephone (02) 9850 7854; email [ethics@mq.edu.au](mailto:ethics@mq.edu.au)). Any complaint you make will be treated in confidence and investigated, and you will be informed of the outcome.

## Pre-study interview questions

The pre-study interview will be conducted in the following steps:

1. The research team will explain the study to the participant.
2. The participant will read and sign the consent form.
3. The participant will be asked to complete a basic demographic survey (approximately 5 minutes).
4. The participant will be asked to complete the Multimorbidity Illness Perceptions Scale (approximately 10 minutes).
5. A semi-structured interview (approximately an hour) will be conducted with the participant regarding the health-related tasks they are engaged in. The interview will be audio recorded to allow for analysis.
6. With the participant's permission, the research team will take photographs of the participant's current medications, medical devices, and their surroundings.
7. The participant will be instructed to the use of the Edesix body camera and the Time-Use Diary.
8. The participant will also receive an instruction card to explain what the study is about if members of the public enquire about it.

### Life History

Examples:

- How was your health as a child or a young person?
- How was the health of your family?
- How have your health conditions affected your job?

### Social Life & Mental Health

Examples:

- Has your health ever affected your interactions with your friends?
- How do you feel about the impact (or lack of) your health had on your social life?
- Can you tell me a bit about your mental journey when you were diagnosed / started on this treatment?
- Do you feel differently towards your health conditions and meds now than you did before?

### Physical Health & Medical History

Examples:

- What health conditions do you have?
- What medications do you take? And how often?
- Do you know much about your health conditions?
- Did you go research on your medications/conditions yourself?
- What kind of food do you have to watch out for due to your health?
- With your level of mobility, how do you find exercise?

1  
2  
3 Physical Environment  
4

5 Examples:

- 6 • How do you find going up and down the stairs?  
7 • Who does your cooking/laundry/gardening?  
8  
9

10 Organisational efforts & Attitude  
11

12 Examples:

- 13 • Do you have domestic help? Paid or unpaid?  
14 • Has the physical layout of your house / any other place affected your ability to take care of  
15 yourself?  
16 • What are your opinions about your medications and your doctors?  
17  
18  
19  
20  
21  
22  
23  
24  
25  
26  
27  
28  
29  
30  
31  
32  
33  
34  
35  
36  
37  
38  
39  
40  
41  
42  
43  
44  
45  
46  
47  
48  
49  
50  
51  
52  
53  
54  
55  
56  
57  
58  
59  
60

## Post-study interview questions

The post-study interview will be conducted in the following steps:

1. The participant will return the Edesix body camera and Time-Use Diary.
2. Data from the body camera will be downloaded to a secure computer.
3. The video from the body camera will be converted into screenshots, with one screenshot taken for every 10 seconds of video footage.
4. After video download and screenshot conversion, the videos will be deleted, and the participant will view the screenshots alone, and has the right to delete any or all the images.
5. The research team will conduct a 30 – 40 minutes interview with the participant, where he/she will describe the study day, with the assistance of the images and the Time-Use Diary, focusing on any specific health-related activities (e.g. Cooking, exercising, social activities).
6. The interview will be audio recorded to allow for thematic analysis.
7. The researchers may also ask participants to clarify the activity in any screenshots that may appear ambiguous (e.g. ceiling images may imply napping on the sofa).
8. The researchers will also check that the time-stamp on the screenshots match the activities reported in the Time-Use Diary (if not, annotate the Time-Use Diary or ask participant questions for clarification).
9. The participants will complete the Participant Experience Survey, and give feedback regarding the study.
10. The participant will be remunerated with a \$60 Westfield shopping voucher for their assistance.

Questions for the semi-structured interview:

Examples

- Tell us about your day.
- Was this a typical day? If not, what was different on this day?
- What time did you start / stop filling in the Time-Use Diary?
- What time did you start / stop video recording?
- Around what time did you wake up and go to bed last night?
- How did you sleep during the study night?
- Do you always do [activity] at this time of the day?
- Is this the kinds of food you usually eat for breakfast/lunch/dinner?
- You spent a long time doing [activity] yesterday. Is this how long you usually take to do [activity]?
- Do you always do [activity] at [location]?
- Are there changes you would like to make to your daily routine?

# BMJ Open

## Patient Work from a Context and Time Use Perspective – A Mixed-Methods Study Protocol

|                                 |                                                                                                                                                                                                                                                                                                                                                                                                                                                                                                                                                                                                                                                                                                                                                                                                                                                                                                                                                                                                  |
|---------------------------------|--------------------------------------------------------------------------------------------------------------------------------------------------------------------------------------------------------------------------------------------------------------------------------------------------------------------------------------------------------------------------------------------------------------------------------------------------------------------------------------------------------------------------------------------------------------------------------------------------------------------------------------------------------------------------------------------------------------------------------------------------------------------------------------------------------------------------------------------------------------------------------------------------------------------------------------------------------------------------------------------------|
| Journal:                        | <i>BMJ Open</i>                                                                                                                                                                                                                                                                                                                                                                                                                                                                                                                                                                                                                                                                                                                                                                                                                                                                                                                                                                                  |
| Manuscript ID                   | bmjopen-2018-022163.R1                                                                                                                                                                                                                                                                                                                                                                                                                                                                                                                                                                                                                                                                                                                                                                                                                                                                                                                                                                           |
| Article Type:                   | Protocol                                                                                                                                                                                                                                                                                                                                                                                                                                                                                                                                                                                                                                                                                                                                                                                                                                                                                                                                                                                         |
| Date Submitted by the Author:   | 12-Aug-2018                                                                                                                                                                                                                                                                                                                                                                                                                                                                                                                                                                                                                                                                                                                                                                                                                                                                                                                                                                                      |
| Complete List of Authors:       | Yin, Kathleen; Macquarie University, Australian Institute of Health Innovation<br>Harms, Teresa; Oxford Brookes University Department of Social Sciences, Centre for Time Use Research; University of Western Australia Business School<br>Ho, Kenneth; Macquarie University, Faculty of Medical and Health Sciences<br>Rapport, Frances ; Macquarie University, Australian Institute of Health Innovation<br>Vagholkar, Sanjyot; Macquarie University, Faculty of Medical and Health Sciences<br>Laranjo, Liliana ; Australian Institute of Health Innovation, Centre for Health Informatics<br>Coiera, Enrico; Macquarie University, 5. Centre for Health Informatics, Australian Institute of Health Innovation, Faculty of Medicine and Health Sciences<br>Gershuny, Jonathan; Oxford Brookes University Department of Social Sciences, Centre for Time Use Research<br>Lau, Annie; Macquarie University, Australian Institute of Health Innovation, Faculty of Medicine and Health Sciences |
| <b>Primary Subject Heading</b>: | Health informatics                                                                                                                                                                                                                                                                                                                                                                                                                                                                                                                                                                                                                                                                                                                                                                                                                                                                                                                                                                               |
| Secondary Subject Heading:      | Patient-centred medicine, Research methods, Qualitative research                                                                                                                                                                                                                                                                                                                                                                                                                                                                                                                                                                                                                                                                                                                                                                                                                                                                                                                                 |
| Keywords:                       | Patient work, Mixed-methods study, Body-worn cameras, Time-use diary, Passive data collection, Burden of disease                                                                                                                                                                                                                                                                                                                                                                                                                                                                                                                                                                                                                                                                                                                                                                                                                                                                                 |
|                                 |                                                                                                                                                                                                                                                                                                                                                                                                                                                                                                                                                                                                                                                                                                                                                                                                                                                                                                                                                                                                  |

SCHOLARONE™  
Manuscripts

1  
2  
3 **1 Patient Work from a Context and Time Use Perspective – A Mixed-Methods Study**

4  
5 **2 Protocol**

6  
7 3 Kathleen Yin<sup>1</sup>, Teresa Harms<sup>2,3</sup>, Kenneth Ho<sup>4</sup>, Frances Rapport<sup>1</sup>, Sanjyot Vagholkar<sup>4</sup>, Liliana

8  
9 4 Laranjo<sup>1</sup>, Enrico Coiera<sup>1</sup>, Jonathan Gershuny<sup>2</sup>, Annie Y. S. Lau<sup>1</sup>

10  
11 5

12  
13 6 Corresponding author:

14  
15 7 Kathleen Yin

16  
17 8 Australian Institute of Health Innovation

18  
19 9 Macquarie University, 75 Talavera Rd, North Ryde NSW 2113

20  
21 10 Email: [kathleen.yin@mq.edu.au](mailto:kathleen.yin@mq.edu.au)

22  
23 11 Telephone: +61 2 9850 2477

24  
25 12

26  
27 13 1. Centre for Health Informatics, Australian Institute of Health Innovation, Macquarie  
28  
29 14 University, Sydney, Australia.

30  
31 15 2. Centre for Time Use Research, Department of Sociology, University of Oxford, Oxford,  
32  
33 16 Oxfordshire, United Kingdom.

34  
35 17 3. Planning and Transport Research Centre, Business School, University of Western  
36  
37 18 Australia, Perth, Australia.

38  
39 19 4. Faculty of Medical and Health Sciences, Macquarie University, Sydney, Australia.

40  
41 20

42  
43 21 Word count: 3951

44  
45 22

46  
47 23

48  
49 24

50  
51 25





1  
2  
3  
4  
5  
6  
7  
8  
9  
10  
11  
12  
13  
14  
15  
16  
17  
18  
19  
20  
21  
22  
23  
24  
25  
26  
27  
28  
29  
30  
31  
32  
33  
34  
35  
36  
37  
38  
39  
40  
41  
42  
43  
44  
45  
46  
47  
48  
49  
50  
51  
52  
53  
54  
55  
56  
57  
58  
59  
60

1  
2  
3  
4  
5  
6  
7  
8  
9  
10  
11  
12  
13  
14  
15  
16  
17  
18  
19  
20  
21  
22  
23  
24  
25  
26  
27  
28  
29  
30  
31  
32  
33  
34  
35  
36  
37  
38  
39  
40  
41  
42  
43  
44  
45  
46  
47  
48  
49  
50  
51  
52  
53  
54  
55  
56  
57  
58  
59  
60

## Strengths and limitations of this study

- This is the first study that employs a mixed-method design using passive digital observation equipment, self-report time-use diaries, complemented with interviews and questionnaires, to document patient work.
- Using the body-worn camera may diminish the observer effect caused by having researchers observe participants in a private setting, as well as reducing the participant burden of having researchers in their homes for prolonged periods of time.
- The self-report diary complements data from the passive device by creating a holistic view of patient work carried out by the participant.
- The study is limited by the 24-hour data collection period, which may not include patient work that occurs frequently, but outside the observation period.

## Keywords

Patient work; Mixed-method study; Body-worn cameras; Time-use diary; Passive data collection devices; Interviews; Burden of disease; Chronic disease; Type 2 diabetes; Chronic co-morbidity; Self-management; Patient experience; Patient; Consumer.

## 1 INTRODUCTION

2 Self-management is widely promoted but less attention is focused on the work required from  
3 patients. It is a constant commitment of learning new skills, breaking old habits, and  
4 managing different emotions over the length of the illness.[1] Patients and their families often  
5 need to adjust their daily routines to accommodate for their health condition, such as making  
6 time to administer medications, visit medical professionals, or prepare special meals.<sup>[2-5]</sup> Yet,  
7 many individuals struggle to practise self-management effectively, especially for those with  
8 long-term chronic conditions.[6-8]

9  
10 Past studies reported on the barriers and challenges to self-management, focusing on patients  
11 with multiple chronic conditions,[6, 7] the difficulty involved in self-management,[8] time  
12 invested,[9] competing priorities,[10, 11] support sources required,[12] and how self-  
13 management differs between the patients' and healthcare professionals' perspectives.[13]  
14 Yet, few studies reported on the actual 'work', or the tasks involved, from the patient, as well  
15 as whether self-management fits within the patient's context.

16  
17 When self-management is poorly integrated into people's lives, the work required has the  
18 potential to generate additional stress, contributing to non-compliance and negatively  
19 impacting on patient health outcomes.[14, 15] Unfortunately, many health interventions are  
20 currently implemented without considering the *work* involved from patient perspective or the  
21 *context* of a patient's life. Treatment and self-management recommendations, whilst given  
22 with good will, often fail to acknowledge the specificities of a patient's daily routine,  
23 physical environment, social obligations, as well as internal beliefs and attitudes.[16-19] In  
24 parallel, digital health interventions hold the promise to improve self-management. However,  
25 numerous studies evaluating digital self-management interventions showed a high participant

1 dropout rate, with some studies having retention rates of 1% by the end of the study  
2 period.[16, 19-21] Specifically, participants reported the devices' lack of 'fit' into their daily  
3 lives as reasons for discontinuation.[22]

4  
5 Understanding whether there is a dissonance between patients' existing routines and the work  
6 involved in self-management is important to overcome barriers and challenges. The concept  
7 of 'patient work', derived from health ergonomics, describes the tasks (physical and  
8 cognitive) conducted by patients to manage their health, as well as the holistic sum of  
9 contexts (physical, social, mental, and organisational) that influence the work conducted.[23-  
10 25] It is an approach to understanding the actions people take (or not take) in self-  
11 management. While self-management focuses on the strategies people employ, patient work  
12 breaks down these strategies into day-to-day tasks and examines how the effort and time  
13 involved, as well as the contextual and ergonomic factors, affect the way self-management is  
14 practised and why some tasks are carried out while others are neglected.

15  
16 The purpose of this study is to examine the *patient work* involved in living with multiple  
17 chronic conditions, focusing on the daily lives of people with type 2 diabetes and chronic co-  
18 morbidities.

## 19 20 **Patient work research**

21 Previous patient work research had focused on patients living with cardiovascular diseases  
22 such as heart failure and stroke.[24-26] However, no studies have focused specifically on  
23 people living with more than one chronic condition.

24

1  
2  
3 1 In addition, previous patient work approaches relied heavily on self-report methods  
4  
5 2 (interviews[27, 28]), direct observation (researchers being present continuously in  
6  
7 3 participants' homes), or theoretical modelling (analysing macro-ergonomic elements[29,  
8  
9 4 30]). These data collection methods are limited by the level of reliability in self-report data  
10  
11 5 (e.g. social desirability effect) and the degree of discomfort participants experience during  
12  
13 6 direct observation.  
14

15  
16 7  
17  
18 8 The need for direct observation by researchers also meant the duration of visits had to be  
19  
20 9 limited, ranging from 30 minutes to 1 hour at a time,[30] making these short periods unlikely  
21  
22 10 to capture the 'natural' routines of participants as there is high likelihood they could be  
23  
24 11 affected by the observer effect.[31] To our knowledge, no studies have utilised digital devices  
25  
26 12 that automatically and non-obstructively collect data on patient work over a longer  
27  
28 13 timeframe.  
29

### 30 31 14 32 33 15 **Type 2 Diabetes and Other Co-morbidities**

34  
35 16 The nature of type 2 diabetes, which impacts the entire metabolic process, means that patients  
36  
37 17 need to carry out a variety of different activities. These may include diet modification,[32]  
38  
39 18 weight management,[33] exercise,[34] complication prevention,[35] blood glucose tests,[36]  
40  
41 19 and insulin injections.[26]  
42

43  
44 20  
45  
46 21 Metabolically-related co-morbidities such as hyperlipidaemia, cardiovascular diseases, and  
47  
48 22 renal disorders[37, 38] are frequently present in people living with type 2 diabetes,  
49  
50 23 warranting the inclusion of co-morbidities to reflect the true extent of patient work. Co-  
51  
52 24 morbidity is also frequently a criterion for exclusion in research studies, suggesting this study  
53  
54  
55  
56  
57  
58  
59  
60

1  
2  
3 1 could give rare insights into the lives of people living with type 2 diabetes, as well as a  
4  
5 2 greater understanding of self-management in patients with chronic co-morbid conditions.  
6  
7 3

#### 9 4 **AIMS**

10 5 This study will investigate the patient work conducted by people living with type 2 diabetes  
11  
12 6 and at least one chronic co-morbidity. It will address three gaps identified in the literature:  
13  
14 7 the few studies reporting the ‘work’ involved in self-management from patient perspective  
15  
16 8 (patient work), the methodological gap in using digital devices to collect data non-  
17  
18 9 obstructively on self-management activities and contexts over a longer time frame (24-hour  
19  
20 10 period), and focusing on people with complex challenges to self-management (those with  
21  
22 11 multiple chronic conditions).  
23  
24  
25  
26  
27  
28

#### 29 13 **METHODS**

30  
31 14 This is a mixed-methods, observational study that involves three stages: i) pre-study  
32  
33 15 interview and questionnaires, ii) a 24-hour period during which participants wear a camera  
34  
35 16 and complete a time-use diary, and a iii) post-study session with interview and study  
36  
37 17 feedback. The project is approved by the Macquarie University Human Research Ethics  
38  
39 18 Committee (approval 5201700718). Our study adapted the protocols used and validated by  
40  
41 19 Kelly et al.,[39, 40] which were employed in research projects conducted by the Centre for  
42  
43 20 Time Use Research (CTUR) and the British Heart Foundation Centre on Population  
44  
45 21 Approaches for Non-Communicable Disease Prevention, both at The University of Oxford.  
46  
47  
48  
49

#### 50 23 **Sample and recruitment**

51  
52 24 Eligible participants are: (1) aged 18 years and older; (2) consenting adults who can speak,  
53  
54 25 write and read in English; (3) have been diagnosed with type 2 diabetes and at least one  
55  
56  
57  
58  
59  
60

1 chronic co-morbidity; (4) willing to complete a time-use diary for one day; and (5) agree to  
2 wear the body-worn camera for one day. Exclusion criteria include those who are currently  
3 experiencing: (1) pregnancy; (2) critical illness; (3) end-stage disease; (4) dementia; (5)  
4 severe mental disorders that prevent one from giving informed consent and; (6) dependent on  
5 others for basic activities of daily living such as dressing and eating. Participants will receive  
6 \$60 in Australian Dollars of shopping vouchers as remuneration.

7  
8 To capture patients at various stages of diabetes, forty (40) participants will be recruited, with  
9 balanced gender ratio, and balanced numbers of participants using only oral medication and  
10 those using insulin. The number of participants chosen was informed by previous qualitative  
11 studies in patient work.[27, 28] This sample size offers the power to achieve rich and  
12 nuanced data, while acknowledging the different time intervals between data points for each  
13 data capture tool.[24, 27, 28] Previous patient work studies analysed 60-80 hours of  
14 interviews or direct observations per study.[27, 28] This study will capture approximately 2  
15 hours of interview data and approximately 5000 images per participant. Therefore, a sample  
16 size of 40 participants is comparable to the depth of data captured by previous studies.

17  
18 Recruitment will be carried out via Macquarie University general practice and general  
19 practitioners and endocrinologists in the surrounding suburbs. These medical practitioners  
20 manage a large and diverse patient base across northern Sydney and cover a wide range of  
21 culturally and economically diverse population groups.

22  
23 Promotional flyers will be distributed to the participating medical practices and includes  
24 general study information and a link to the study website, where potential participants can  
25 check the eligibility criteria ([www.tinyurl.com/patientswork](http://www.tinyurl.com/patientswork)). The study will also be

1 promoted on the Macquarie University Facebook page and via an emailed newsletter  
2 associated with the University. Healthcare practitioners will not be notified if their patients  
3 agreed to participate in the study to reduce the possibility of coercion.  
4  
5 Databases of medical practices involved in recruitment will be searched to identify eligible  
6 patients for the study. Only personnel employed by the medical practices will conduct these  
7 searches. Participating healthcare practitioners will also send invitation letters to eligible  
8 patients, with a pre-paid reply slip included. Patients interested in participating will be asked  
9 to return the reply slip with their contact details, so a member of the research team can  
10 contact them.  
11  
12 Telephone calls will also made to eligible patients to inform them about the study. If during  
13 the initial phone call the potential participant agrees to consider participating, the researcher  
14 will send a detailed email to the participant with a digital version of the information pamphlet  
15 as well as a link to the study website. The potential participant then either agrees to  
16 participate or declines. If the potential participant agrees to participate, the researcher will  
17 arrange a suitable time for interviews to occur. All participants will provide written informed  
18 consent before data collection commences.  
19  
20 Initial contact for all participants will be a telephone call conducted by the research team, to  
21 check whether the participant fits the eligibility criteria, assure confidentiality and anonymity  
22 during data-collection, and address any questions. This approach will minimise participant  
23 contact with the research team and clinicians. While self-nominated participants may be  
24 subject to participation bias, high completion rates and compliance are likely.  
25



## 1 **Patient and Public Involvement**

2 The concept study was conceived during a 1-day Consumer Symposium conducted at  
3 Macquarie University, where 10 health consumers gave feedback and critique regarding  
4 health research.

5  
6 Health Consumers New South Wales, a patient advocacy group, was then consulted  
7 regarding consumer engagement and advice was given to the researchers regarding consumer  
8 involvement during study conception, recruitment, analysis to dissemination.

9  
10 A pilot trial of the protocols with the equipment was conducted with two patients. Summaries  
11 of the findings were presented to the participants.

12  
13 During study conception, the researchers also engaged with Healthdirect, a national  
14 organization providing digital health information for health consumers, and the Northern  
15 Sydney Primary Health network and local GP network, which has a consumer council.

16  
17 Results will be disseminated to these bodies, which will have broader implications to policies  
18 directed to consumers. Publications arising from the study will also be forwarded to each  
19 participant via emails.

## 20 21 **Data collection instruments and equipment**

22 The study will be carried out in three stages as described in Figure 1 and Table 1. Utilising  
23 multiple types of data, the study generates a holistic report of patient work conducted by  
24 people living with type 2 diabetes and chronic co-morbidities in terms of observed physical

1 work, organisational efforts, burden of disease, and attitudes and beliefs underlying health  
2 behaviours.

3  
4  
5  
6  
7  
8  
9  
10  
11  
12  
13  
14  
15  
16  
17  
18  
19  
20  
21  
22  
23  
24  
25  
26  
27  
28  
29  
30  
31  
32  
33  
34  
35  
36  
37  
38  
39  
40  
41  
42  
43  
44  
45  
46  
47  
48  
49  
50  
51  
52  
53  
54  
55  
56  
57  
58  
59  
60

Table 1. Data collected at different stages during the study

| Pre-study                                                                                                                                                                                                                                    | Data collection (24-hour)                                                                                   | Post-study                                                                                                                                                                 |
|----------------------------------------------------------------------------------------------------------------------------------------------------------------------------------------------------------------------------------------------|-------------------------------------------------------------------------------------------------------------|----------------------------------------------------------------------------------------------------------------------------------------------------------------------------|
| <ul style="list-style-type: none"> <li>• Interview (1-hour)</li> <li>• Participant demographics questionnaire</li> <li>• Multimorbidity Illness Perceptions Scale[41]</li> <li>• Photos of participant's home (where appropriate)</li> </ul> | <ul style="list-style-type: none"> <li>• Body-worn camera</li> <li>• Time-use diary (Appendix 1)</li> </ul> | <ul style="list-style-type: none"> <li>• Reconstruction interview (30-40 minutes)</li> <li>• Participant experience questionnaire</li> <li>• Researcher's notes</li> </ul> |

The following instruments and equipment will be used for data collection.

- Time-use diary - The self-report time-use diary is a validated tool[39] and the version used in this study is the Harmonised European Time Use Diary[42] (UK version). For details of the time-use diary, please see Appendix 2. This method of using free-text time-use diaries to self-report activities has high statistical validity and good acceptance rates with volunteer participants (ranging from 56% to 100%[39, 43]).
- Photos – With permission from the participant, photos of their medications, medical devices, and home surroundings will be taken to inform about the participant's physical environment. Should the participant reside in an environment that can affect their healthcare (e.g. a house with stairs and a risk for falls), these issues will be taken into consideration. Participants will be alerted should an immediate and significant risk be identified.
- Body-worn camera – The body-worn camera (Edesix VB-300, Edinburgh) will automatically record silent continuous video footage. It can be attached to clothing and/or worn on a lanyard. Previous studies with body-worn cameras showed high

- 1  
2  
3 1 degrees of acceptability, with acceptance rates ranging from 70% to 100%[39, 43,  
4  
5 2 44], especially when participants are reassured they can remove the camera if they  
6  
7 3 feel the recording may intrude upon their privacy[39, 43].  
8  
9 4 • Demographic questionnaire – The demographic questionnaire (Appendix 3) will be  
10  
11 5 administered during the pre-study session and takes about 10 minutes to complete.  
12  
13  
14 6 • The Multimorbidity Illness Perceptions Scale – The Multimorbidity Illness  
15  
16 7 Perceptions Scale [41] (Appendix 4) is validated statistically and was developed to  
17  
18 8 capture the perception of patients with co-morbidities about their health.[41] Illness  
19  
20 9 perception is known to affect and predict health-related behaviour, to the extent that  
21  
22 10 patients who perceive their diseases as more controllable are more likely to engage in  
23  
24 11 adaptive strategies[45], thus directly affecting the patient work they engage in. The  
25  
26 12 Scale will be administered during the pre-study session and takes approximately 5  
27  
28 13 minutes to complete.  
29  
30  
31 14 • Participant experience questionnaire – A participant experience questionnaire  
32  
33 15 (Appendix 5) will be administered during the post-study session. This is estimated to  
34  
35 16 take approximately 10 minutes.  
36  
37  
38 17 • Researcher notes: a summary of each participant will be written up within a week  
39  
40 18 after the post-study session, summarising the researcher’s observations of the  
41  
42 19 participant, home context, and any feedback from the participant at different stages of  
43  
44 20 the study.  
45  
46  
47 21

## 22 **Stage 1: Pre-study session**

23 Prior to the pre-study session, participants will be provided with the Participant Information  
24 Booklet (Appendix 1) and will sign a written informed consent form (Appendix 6) before

1  
2  
3 1 data is collected. Participants have the right to decline at this stage and to retract consent at  
4  
5 2 any time throughout the study.  
6

7 3  
8  
9 4 Ideally, the pre-study interview will occur in the participant's home for researchers to note  
10  
11 5 ergonomic factors. To ensure researcher safety, two researchers will make the home visits.  
12  
13 6 Participants may come to Macquarie University for the interview if they prefer.  
14  
15

16 7  
17  
18 8 Following consent and before the pre-study interview, participants will also be asked to  
19  
20 9 complete the demographic questionnaire (Appendix 3) and the Multimorbidity Illness  
21  
22 10 Perceptions Scale[41] (Appendix 4).  
23  
24

#### 25 11 26 12 *Pre-study interview*

27  
28 13 After the completion of the questionnaires, a semi-structured interview will be conducted to  
29  
30 14 gain information about the participant's life history, medical history, and existing factors that  
31  
32 15 impact patient work. Participants will be invited to talk about their health and lifestyle, with  
33  
34 16 areas of focus separated into life history, social life and mental health, physical health and  
35  
36 17 medical history, physical environment, and organisational effort and attitude (Appendix 7).  
37  
38 18 With the participant's permission, the interview will be audio-recorded to assist with data  
39  
40 19 coding and thematic analysis (e.g. daily activities, rationales behind behaviours, and factors  
41  
42 20 that influence why participants behave in certain manners).  
43  
44  
45

46 21  
47  
48 22 Lastly, participant will be provided with a body-worn camera and the Harmonised European  
49  
50 23 Time Use Surveys UK Time-Use Diary (Appendix 2),[42] together with relevant instructions.  
51  
52 24 Photographs of the participant's medications, medical devices and home environment will  
53  
54 25 also be taken at this stage.  
55  
56  
57

1

## 2 **Stage 2: Participant self-recording data collection**

3 During the 24-hour study period, participants will be asked to wear the camera around their  
4 neck on a lanyard during waking hours (12-16 hours). The time-use diary will be completed  
5 by the participant over the course of the same day for 24 hours. Participants will be given  
6 instructions (Figure 2) to re-charge the camera overnight or if the battery becomes low.

7

## 8 **Stage 3: Post-study session**

9 A post-study session will occur immediately after the 24-hour study period has concluded.  
10 The camera footage will be downloaded and converted into images using software developed  
11 in-house, with one screenshot taken for every 10 seconds of footage. The participants will be  
12 able to view all the images alone before the research team views them, allowing the  
13 participant to delete any or all unwanted images.

14

### 15 *Post-study 'reconstruction' interview*

16 The participant will be interviewed for approximately 30 – 40 minutes after data collection  
17 (Appendix 8). Participants will be asked to describe the study day, using the screenshots and  
18 time-use diary as prompts, with a focus on health-related tasks. The interview will be audio  
19 recorded with the participant's permission to allow for thematic analysis of transcripts.

20

21 After the interview, the participant will be asked to complete the Participant Experience  
22 Questionnaire (Appendix 5) and provide feedback on the methodology.

23

## 24 **DATA ANALYSIS**

1  
2  
3 1 Both qualitative and quantitative data will be gathered and analysed. The varied data sources  
4  
5 2 are complementary and focus on different aspects of patient work. For example, self-reported  
6  
7 3 data regarding daily tasks via the time-use diary can be enriched through an examination of  
8  
9 4 the screenshots from the camera.  
10

### 11 5 12 13 6 **Quantitative data analysis**

14  
15 7 Video recordings from the body-worn camera will be automatically converted into series of  
16  
17 8 10-second screenshots, which are then processed for analysis of daily activities (e.g. eating,  
18  
19 9 sleeping). These screenshots will be tagged using the TensorFlow[46] and/or Clarifai™ (New  
20  
21 10 York, USA) Application Programming Interface, which automatically generate tags that  
22  
23 11 identify objects and describe content within the image (e.g. a lady and a car). A subset of  
24  
25 12 these tags will be manually verified for accuracy.  
26  
27  
28  
29  
30

31 14 Time-use diary data will be analysed in conjunction with camera screenshots. Participants'  
32  
33 15 activities reported in the time-use diary and observed via screenshots will be coded using an  
34  
35 16 adapted version of the Harmonised European Time Use Surveys activity frame[47], and  
36  
37 17 assessed for the duration, frequency, timing and patterns.  
38  
39  
40

41  
42 19 Questionnaire data (participant demographics, study feedback, and the Multimorbidity Illness  
43  
44 20 Perceptions Scale) will be reported using descriptive and inferential statistics. All statistical  
45  
46 21 analyses will be conducted using SPSS® (IBM, New York, USA).  
47  
48  
49

### 50 23 **Qualitative Data Analysis**

51  
52 24 Both pre-study and post-study interviews will be transcribed verbatim. Analysis of the  
53  
54 25 interview transcripts will be conducted using the NVivo® thematic analysis software package  
55  
56  
57

1 (NVivo, Melbourne, Australia).[48] Two members of the research team will independently  
2 code the transcripts in a systematic manner. Any coding discrepancies between the two will  
3 be resolved through reaching a consensus.

4  
5 Photographs of the participant's medications, medical devices, and home environment and  
6 camera screenshots will provide context to the interview. The photographs will also be used  
7 to give contextual feedback regarding the participant's daily activities, as revealed in the  
8 video recordings and time-use diaries. Notes taken by researchers after the post-study  
9 interview for each participant will be used to help with photo and qualitative data analysis.

## 11 **ETHICS AND INFORMATION DISSIMINATION**

12 Ethical considerations arising from this study are addressed below.

### 14 **Consent and freedom to withdraw**

15 Participants' questions or concerns will be addressed individually and with all due diligence.  
16 Participants will be free to withdraw from the study at any point and can remove the camera  
17 at any time during the study day without giving a reason. The decision to join the study will  
18 have no consequence on their relationship with either Macquarie University or their health  
19 professionals.

### 21 **Third-party and bystander consent**

22 The research team will provide participants with a wallet-sized card that includes the  
23 statement below with contact information of the research team, which can be shown to others  
24 (to reduce the psychological burden of the participant) should anyone approach the  
25 participants to ask about the camera.

1  
2  
3 1  
4  
5 2 *“I am volunteering for a research project. The device is a wearable camera and the images*  
6  
7 3 *will be used to record my daily activities. I am happy to remove it if you would like me to.”*  
8  
9 4

10  
11 5 Should anyone request video recordings to be deleted, we ask participants to take note of the  
12  
13 6 time that requests were made, and to assure the enquirer that the related recordings will be  
14  
15 7 removed at the post-study session. Participants are also asked to inform their household  
16  
17 8 members, friends, and acquaintances about the study, and to seek permission from these  
18  
19 9 parties prior to recording.  
20  
21  
22 10

### 23 11 **Personal privacy**

24  
25  
26 12 Participants will be asked to keep the body-worn camera off during situations when anyone  
27  
28 13 (including themselves) is dressing, undressing, using the bathroom, showering, or during any  
29  
30 14 situations where privacy is of concern. Participants will be advised that they should always  
31  
32 15 prioritise their own personal safety and comfort above the study’s requirements.  
33  
34 16

35  
36  
37 17 Furthermore, participants will be able to view and delete any (or all) of the extracted images  
38  
39 18 before researchers view the images or videos at the start of the post-study session. The videos  
40  
41 19 will be deleted immediately after screenshots are extracted. Only members of the research  
42  
43 20 team will have access to the screenshots. None of the video or screenshots will be released to  
44  
45 21 the public, academic peers, or participants. Should participants provide written informed  
46  
47 22 consent for the research team to use their images in publications or presentations, the images  
48  
49 23 will be blurred such that no one is identifiable.  
50  
51 24



1  
2  
3 1 To ensure the participant's privacy, names and other identifying information will be removed  
4  
5 2 in the photos of medications.  
6

7 3

#### 9 4 **Participant feedback**

11 5 Participants will be asked about their experiences in the study during the post-study  
12  
13 6 interview. A questionnaire to assess the participant's experience (Appendix 5) will also be  
14  
15 7 administered. Participants will be provided with contact details of the research team (email  
16  
17 8 and phone number) for contact during the study.  
18  
19

20 9

#### 22 10 **Psychological support**

24 11 In the unlikely case that participants become psychologically distressed during either of the  
25  
26 12 interview sessions, a staff member with counselling experience will be present in both  
27  
28 13 interviews to deal with any anxiety the participant may experience. Should participants  
29  
30 14 experience high levels of distress during the study day, they are advised that they should  
31  
32 15 immediately attend their local hospital emergency department, general practitioner, and/or  
33  
34 16 call Lifeline or Emergency Services.  
35  
36

37 17

#### 39 18 **Participant Identification**

41 19 Participant identities will not be masked during data collection. Participants will be  
42  
43 20 individually identifiable due to the small sample size. However, their identities will only be  
44  
45 21 known to the research team, and only members of the research team will have access to  
46  
47 22 identifiable data. Data will be separated from contact details and stored in separate locations.  
48  
49 23 No identifying information about the participant will be published or presented.  
50  
51

52 24

#### 54 25 **Information dissemination**

1  
2  
3 1 Great caution will be taken in the handling and storage of the data by the research team so  
4  
5 2 that risks to privacy are minimised, in accordance with the Australian Code for the  
6  
7 3 Responsible Conduct of Research. Only members of the research team will have access to the  
8  
9 4 data. The videos will be downloaded into a secure browser in a password-protected computer  
10  
11 5 or Macquarie University servers. All physical copies of surveys and questionnaires will be  
12  
13 6 locked in secure cabinets at Macquarie University. The data will be held for a minimum of 5  
14  
15 7 years. Anonymity will be upheld throughout reporting, and participants will only be referred  
16  
17 8 to by their participant number.  
18  
19  
20 9

## 22 10 **DISCUSSION**

24 11 At the time of writing, the study had engaged 40 potential participants and 23 participants  
25  
26 12 completed the study, more than half of the number of participants the study aims for.  
27  
28  
29 13

31 14 The reasons some potential participants did not take part in the study included: declined  
32  
33 15 consent due to personal reasons (which the participant did not disclose), unable to  
34  
35 16 communicate in English to a sufficient standard (as judged by the researcher during the initial  
36  
37 17 phone call), too busy with work, too busy due to full-time care of family members, going on  
38  
39 18 a holiday, was sick on the scheduled visit and withdrew from the study, was not home when  
40  
41 19 the researchers visited and withdrew from the study. No participant who completed the study  
42  
43 20 had withdrawn their consent to date.  
44  
45  
46 21

48 22 Completion rates for the time-use diary is very high, with 21 out of 23 participants  
49  
50 23 successfully filling the diary throughout the study day. The two participants who did not fill  
51  
52 24 in the diary did so during the post-study interview, with the assistance of recorded footage.  
53  
54  
55 25

1 All participants complied to continuous camera recording. There was a variation of camera  
2 recording time between participants, due to some participants turning the camera off for some  
3 periods of time out of privacy concerns.

4  
5 One challenge the study had faced was communicating camera operations effectively to the  
6 participants. Some participants had difficulty turning off the camera and charging the camera  
7 battery due to reasons such as forgetfulness and confusion regarding the orientation of the  
8 camera buttons. To address the issue, the research team had devoted more time during the  
9 pre-study interview to physically demonstrate how to use the camera, which had successfully  
10 improved participant understanding of camera operations.

## 12 **CONCLUSION**

13 This study will test a novel mixed-method approach using a digital data collection device,  
14 interviews, time-use diaries, and questionnaires to investigate the nature and extent of patient  
15 work in participants with type 2 diabetes and chronic co-morbidity. Results from this study  
16 will serve to assess whether passive observation of participants via a body-worn camera,  
17 combined with self-reported activities using the time-use diary, and semi-structured interviews  
18 will result in more holistic and informative coverage of patient work.

## 20 **Author's contributions:**

21 Study conceptualisation: AL, EC; Study design: AL, KY, TH, JG; Data collection  
22 preparation and analysis plan: KY, TH, AL, LL, FP; Recruitment and liaison: KH, SV; First  
23 draft: KY, AL; Draft revision: all authors provided feedback and approved the manuscript.

## 25 **Acknowledgements:**

- 1  
2  
3 1 • Financial: The project is supported by New South Wales Health Early-to-Mid Career  
4  
5 2 Research Fellowship awarded to AL. The funding body did not have a role in study  
6  
7 3 design and execution; data collection, management, analysis, and interpretation; or  
8  
9 4 manuscript preparation, review, or approval.  
10  
11 5 • Protocols: The authors of this paper wish to acknowledge the researchers who designed  
12  
13 6 and carried out the CAPTURE-24 Project carried out at the University of Oxford: Teresa  
14  
15 7 Harms (University of Oxford, Department of Sociology, Centre for Time Use Research,  
16  
17 8 Oxford, OX2 6HP United Kingdom), Jonathan Gershuny (University of Oxford,  
18  
19 9 Department of Sociology, Centre for Time Use Research, Oxford, OX2 6HP United  
20  
21 10 Kingdom), Aiden Doherty (Nuffield Department of Population Health, University of  
22  
23 11 Oxford, UK), Emma Thomas (Melbourne School of Population and Global Health,  
24  
25 12 University of Melbourne, Australia), Karen Milton (Norwich Medical School, University  
26  
27 13 of East Anglia, Norwich, UK), Charlie Foster (School for Policy Studies, University of  
28  
29 14 Bristol, UK).  
30  
31  
32  
33 15 • Technical: The screenshot extraction and tagging system was developed in-house by Mr  
34  
35 16 Wen-Jun Liang and Mr Joshua Haddrill, two work placement students from the Faculty  
36  
37 17 of Engineering at Macquarie University.  
38  
39  
40 18 • Study: Mr Joshua Jung, Ms Isabelle Barnes, Mr Jiawei He, and Mr Christian Tran (work  
41  
42 19 placement students from Macquarie University) assisted with participant recruitment,  
43  
44 20 home visits, and administrative tasks.  
45  
46 21 • Participant recruitment: Professor Bernard Tuch and Dr Priscilla Wong, who assisted  
47  
48 22 with recruitment at the early stages of the study.  
49  
50  
51 23 • Drafting the manuscript: Dr Theun Pieter van Tienoven from the University of New  
52  
53 24 South Wales, for his valuable comments and suggestions on earlier drafts of the  
54  
55 25 manuscript.  
56  
57  
58  
59  
60

- 1 • The authors would like to thank the study participants for their valuable time and input.

### 3 **Competing interests:**

4 Some participants may be recruited via the Macquarie Health General Practitioner clinic and  
5 Macquarie Hospital, where SV is practicing as a general practitioner and KH is practicing as  
6 an endocrinologist, respectively. Therefore, the two team members may be responsible for  
7 the treatment of some participants. However, SV and KH will not know whether a patient is a  
8 participant unless the participant informs them.

10 Figure 1: Flow diagram illustrating the tasks involved at each stage of the study.

11 Figure 2: Instructions provided to participants regarding the operation of the body-worn  
12 camera.

### 16 **References**

- 17 1. Lorig KR, Holman HR. Self-management education: History, definition, outcomes, and  
18 mechanisms *Ann Behav Med* 2003;26(1):1-7. doi:  
19 [https://doi.org/10.1207/S15324796ABM2601\\_01](https://doi.org/10.1207/S15324796ABM2601_01)
- 20 2. Kaptein AA, Fischer MJ, Scharloo M. Self-management in patients with COPD: theoretical  
21 context, content, outcomes, and integration into clinical care. *Int J Chron Obstruct*  
22 *Pulmon Dis* 2014;9:907-17. doi: <http://dx.doi.org/10.2147/COPD.S49622>
- 23 3. Apps LD, Harrison SL, Williams JEA, et al. How do informal self-care strategies evolve  
24 among patients with chronic obstructive pulmonary disease managed in primary  
25 care? A qualitative study. *Int J Chron Obstruct Pulmon Dis* 2014;9:257-63. doi:  
26 <http://dx.doi.org/10.2147/COPD.S52691>
- 27 4. Bodenheimer T, Lorig K, Holman H, et al. Patient Self-management of Chronic Disease in  
28 Primary Care. *J Am Med Assoc* 2002;288:2469-75.
- 29 5. Clark NM, Gong M, Kaciroti N. A Model of Self-Regulation for Control of Chronic Disease.  
30 *Health Educ Behav* 2001;28:769-82. doi: 10.1177/109019810102800608
- 31 6. Liddy C, Blazkho V, Mill K. Challenges of self-management when living with multiple  
32 chronic conditions: Systematic review of the qualitative literature. *Can Fam Physician*  
33 2014;60(12):1123-33.

- 1 7. Koch G, Wakefield BJ, Wakefield DS. Barriers and Facilitators to Managing Multiple  
2 Chronic Conditions: A Systematic Literature Review. *West J Nurs Res* 2015;37(4):498-  
3 516.
- 4 8. Ong BN, Jinks C, Morden A. The hard work of self-management: Living with chronic knee  
5 pain. *International Journal of Qualitative Studies on Health and Well-being*  
6 2011;6(3):10.3402/qhw.v6i3.7035. doi: doi:10.3402/qhw.v6i3.7035
- 7 9. Yen L, McRae IS, Jowsey T, et al. Health work by older people with chronic illness: how  
8 much time does it take? . *Chronic Illness* 2013;9(4):268-82. doi:  
9 <https://doi.org/10.1177/1742395313476720>
- 10 10. van Houtum L, Rijken M, Groenewegen P. Do everyday problems of people with chronic  
11 illness interfere with their disease management? *BMC Public Health* 2015;15:1000.  
12 doi: <https://doi.org/10.1186/s12889-015-2303-3>
- 13 11. Cheraghi-Sohi S, Morden A, Bower P, et al. Exploring patient priorities among long-term  
14 conditions in multimorbidity: A qualitative secondary analysis *SAGE Open Medicine*  
15 2013;1 doi: <https://doi.org/10.1177/2050312113503955>
- 16 12. Dwarswaard J, Bakker EJM, van Staa A, et al. Self-management support from the  
17 perspective of patients with a chronic condition: a thematic synthesis of qualitative  
18 studies. *Health Expect* 2015;19(2):194-208. doi: <https://doi.org/10.1111/hex.12346>
- 19 13. Sadler E, Wolfe CDA, McKeivitt C. Lay and health care professional understandings of  
20 self-management: A systematic review and narrative synthesis *SAGE Open Medicine*  
21 2014;2014(2) doi: <https://doi.org/10.1177/2050312114544493>
- 22 14. Thille P, Ward N, Russell G. Self-management support in primary care: Enactments,  
23 disruptions, and conversational consequences. *Soc Sci Med* 2014;108:97-105. doi:  
24 <http://dx.doi.org/10.1016/j.socscimed.2014.02.041>
- 25 15. Crowley MJ, Holleman R, Klamerus ML, et al. Factors associated with persistent poorly  
26 controlled diabetes mellitus: Clues to improving management in patients with  
27 resistant poor control. *Chronic Illness* 2014;10(4):291–302. doi:  
28 10.1177/1742395314523653
- 29 16. Free C, Phillips G, Galli L, et al. The Effectiveness of Mobile-Health Technology-Based  
30 Health Behaviour Change or Disease Management Interventions for Health Care  
31 Consumers: A Systematic Review. *PLoS Med* 2013;10(1):e1001362. doi:  
32 10.1371/journal.pmed.1001362
- 33 17. Alzubaidi H, Namara KM, Browning C. Time to question diabetes self-management  
34 support for Arabic-speaking migrants: exploring a new model of care. *Diabet Med*  
35 2017;34:348–55. doi: 10.1111/dme.13286
- 36 18. Schinckus L, Dangoisse F, Broucke SVd, et al. When knowing is not enough: Emotional  
37 distress and depression reduce the positive effects of health literacy on diabetes  
38 self-management. *Patient Educ Couns* 2017 doi:  
39 <http://dx.doi.org/10.1016/j.pec.2017.08.006>
- 40 19. Valdez RS, Gibbons MC, Siegel ER, et al. Designing consumer health IT to enhance  
41 usability among different racial and ethnic groups within the United States. *Health*  
42 *and technology* 2012;2:225-33. doi: 10.1007/s12553-012-0031-6
- 43 20. Farvolden P, Denisoff E, Selby P, et al. Usage and Longitudinal Effectiveness of a Web-  
44 Based Self-Help Cognitive Behavioral Therapy Program for Panic Disorder. *J Med*  
45 *Internet Res* 2005;7(1):e7. doi: 10.2196/jmir.7.1.e7
- 46 21. Eysenbach G. The Law of Attrition. *J Med Internet Res* 2005;7(1):e11. doi:  
47 10.2196/jmir.7.1.e11

- 1  
2  
3 1 22. Yu CH, Bahniwal R, Laupacis A, et al. Systematic review and evaluation of web-accessible  
4 2 tools for management of diabetes and related cardiovascular risk factors by patients  
5 3 and healthcare providers. *J Am Med Inform Assoc* 2012;19:514e22. doi:  
6 4 10.1136/amiajnl-2011-000307  
7 5  
8 23. Valdez RS, Holden RJ, Novak LL, et al. Transforming consumer health informatics through  
9 6 a patient work framework: connecting patients to context. *J Am Med Inform Assoc*  
10 7 2015;22:2-10. doi: doi:10.1136/amiajnl-2014-002826  
11 8  
12 24. Mickelson RS, Holden RJ. Medication management strategies used by older adults with  
13 9 heart failure: A systems-based analysis. *Eur J Cardiovasc Nurs* 2017;1(11) doi:  
14 10 10.1177/1474515117730704  
15 11  
16 25. Mickelson RS, Unertl KM, Holden RJ. Medication Management: The Macro-cognitive  
17 12 Workflow of Older Adults With Heart Failure. *JIMR Human Factors* 2016;3(2):e27.  
18 13 doi: 10.2196/humanfactors.6338  
19 14  
20 26. Khunti K, Davies MJ, Kalra S. Self-titration of insulin in the management of people with  
21 15 type 2 diabetes: a practical solution to improve management in primary care.  
22 16 *Diabetes Obes Metab* 2013;15(8):690-700. doi: 10.1111/dom.12053  
23 17  
24 27. Holden RJ, Valdez RS, Schubert CC, et al. Macroergonomic factors in the patient work  
25 18 system: examining the context of patients with chronic illness. *Ergonomics*  
26 19 2017;16(1):26-43. doi: 10.1080/00140139.2016.1168529  
27 20  
28 28. Holden RJ, Schubert CC, Mickelson RS. The patient work system: An analysis of self-care  
29 21 performance barriers among elderly heart failure patients and their informal  
30 22 caregivers. *Appl Ergon* 2015;March:133-50. doi: 10.1016/j.apergo.2014.09.009  
31 23  
32 29. Carayon P, Karsh B-T, Gurses AP, et al. Macroergonomics in Healthcare Quality and  
33 24 Patient Safety. *Review of Human Factors and Ergonomics* 2013;8(1):4-54. doi:  
34 25 10.1177/1557234X13492976  
35 26  
36 30. Heiden SM, Holden RJ, Alder CA, et al. Human factors in mental healthcare: A work  
37 27 system analysis of a community-based program for older adults with depression and  
38 28 dementia. *Appl Ergon* 2017;64:27-40. doi: doi.org/10.1016/j.apergo.2017.05.002  
39 29  
40 31. McCambridge J, Witton J, Elbourne DR. Systematic review of the Hawthorne effect: New  
41 30 concepts are needed to study research participation effects. *J Clin Epidemiol*  
42 31 2014;67(3) doi: doi.org/10.1016/j.jclinepi.2013.08.015  
43 32  
44 32. Khazrai YM, Defeudis G, Pozzilli P. Effect of diet on type 2 diabetes mellitus: a review.  
45 33 *Diabetes Metab Res Rev* 2014;30(Suppl. 1):24-33. doi: 0.1002/dmrr.2515  
46 34  
47 33. Wilding JPH. The importance of weight management in type 2 diabetes mellitus. *Int J*  
48 35 *Clin Pract* 2014;68(6):682-91. doi: 10.1111/ijcp.12384  
49 36  
50 34. Balducci S, Sacchetti M, Haxhi J, et al. Physical exercise as therapy for type 2 diabetes  
51 37 mellitus. *Diabetes Metab Res Rev* 2014;Suppl. 1:13-23. doi: 10.1002/dmrr.2514  
52 38  
53 35. Costa LA, Canani LH, Lisboa HRK, et al. Aggregation of features of the metabolic  
54 39 syndrome is associated with increased prevalence of chronic complications in Type 2  
55 40 diabetes. *Diabet Med* 2004;21(3):252-55. doi: 10.1046/j.1464-5491.2003.01124.x  
56 41  
57 36. Bosi E, Scavini M, Ceriello A, et al. Intensive Structured Self-Monitoring of Blood Glucose  
58 42 and Glycemic Control in Noninsulin-Treated Type 2 Diabetes. *Diabetes Care*  
59 43 2013;36(10):2887-94. doi: 10.2337/dc13-0092  
60 44  
61 37. Wasem J, Bramlage P, Gitt AK, et al. Co-morbidity but not dysglycaemia reduces quality  
62 45 of life in patients with type-2 diabetes treated with oral mono- or dual combination  
63 46 therapy – an analysis of the DiaRegis registry. *Cardiovasc Diabetol* 2013;12(47) doi:  
64 47 10.1186/1475-2840-12-47



- 1  
2  
3 1 38. Kannan H, Thompson S, Bolge SC. Economic and Humanistic Outcomes Associated With  
4 2 Comorbid Type-2 Diabetes, High Cholesterol, and Hypertension Among Individuals  
5 3 Who Are Overweight or Obese. *J Occup Environ Med* 2008;50(5):542-9. doi:  
6 4 10.1097/JOM.0b013e31816ed569  
7 5 39. Kelly P, Thomas E, Doherty A, et al. Developing a Method to Test the Validity of 24 Hour  
8 6 Time Use Diaries Using Wearable Cameras: A Feasibility Pilot. *PLoS One*  
9 7 2015;e0142198 doi: DOI:10.1371/journal.pone.0142198  
10 8 40. Kelly P, Marshall SJ, Badland H, et al. An Ethical Framework for Automated, Wearable  
11 9 Cameras in Health Behavior Research. *Am J Prev Med* 2013;44(3):314-19. doi:  
12 10 <http://dx.doi.org/10.1016/j.amepre.2012.11.006>  
13 11 41. Gibbons CJ, Kenning C, Coventry PA, et al. Development of a Multimorbidity Illness  
14 12 Perceptions Scale (MULTIPLEs). *PLoS One* 2013;8(12):e81852. doi:  
15 13 10.1371/journal.pone.0081852  
16 14 42. Eurostat. Harmonised European Time Use Surveys 2008 Guidelines. Luxembourg:  
17 15 Eurostat, 2009.  
18 16 43. Kelly P, Doherty A, Mizdrak A, et al. High group level validity but high random error of a  
19 17 self-report travel diary, as assessed by wearable cameras. *Journal of Transport &*  
20 18 *Health* 2014;1:190-201.  
21 19 44. Doherty AR, Kelly P, Kerr J, et al. Using wearable cameras to categorise type and context  
22 20 of accelerometer-identified episodes of physical activity. *International Journal of*  
23 21 *Behavioral Nutrition and Physical Activity* 2013;10(22) doi:  
24 22 <http://www.ijbnpa.org/content/10/1/22>  
25 23 45. Hagger MS, Koch S, Chatzisarantis NLD, et al. The common sense model of self-  
26 24 regulation: Meta-analysis and test of a process model. *Psychol Bull*  
27 25 2017;143(11):1117-54. doi: 10.1037/bul0000118 [published Online First:  
28 26 2017/08/15]  
29 27 46. Abadi M, Agarwal A, Barham P, et al. TensorFlow: Large-Scale Machine Learning on  
30 28 Heterogeneous Distributed Systems. 2016 doi: arXiv:1603.04467v2 [cs.DC]  
31 29 47. Oxford Uo. MULTINATIONAL TIME USE STUDY - USER'S GUIDE AND DOCUMENTATION,  
32 30 2012.  
33 31 48. Braun V, Clarke V. Using thematic analysis in psychology. *Qual Res Psychol* 2006;3(2):77-  
34 32 101. doi: <http://dx.doi.org/10.1191/1478088706qp063oa>  
35 33



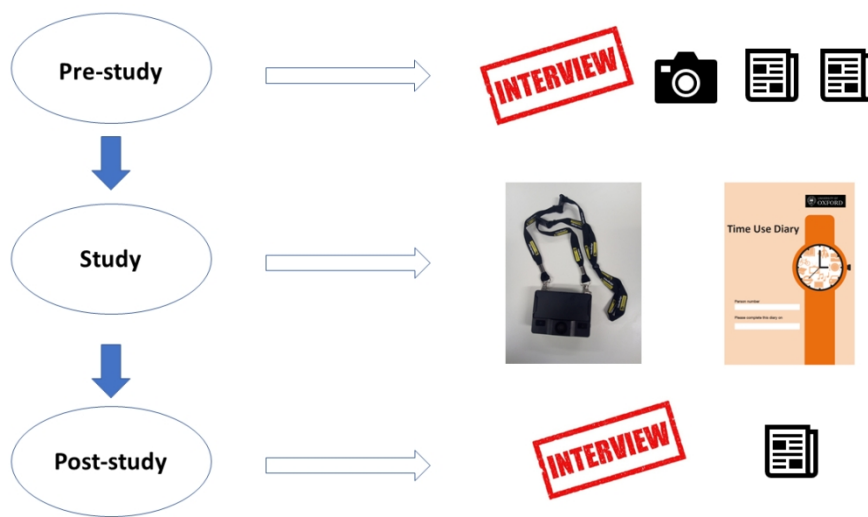

Figure 1: Flow diagram illustrating the tasks involved at each stage of the study.

108x60mm (300 x 300 DPI)

1  
2  
3  
4  
5  
6  
7  
8  
9  
10  
11  
12  
13  
14  
15  
16  
17  
18  
19  
20  
21  
22  
23  
24  
25  
26  
27  
28  
29  
30  
31  
32  
33  
34  
35  
36  
37  
38  
39  
40  
41  
42  
43  
44  
45  
46  
47  
48  
49  
50  
51  
52  
53  
54  
55  
56  
57  
58  
59  
60

|                                                                                     |                                                                                                                                                                                                                                                                                                  |                                                                   |
|-------------------------------------------------------------------------------------|--------------------------------------------------------------------------------------------------------------------------------------------------------------------------------------------------------------------------------------------------------------------------------------------------|-------------------------------------------------------------------|
|                                                                                     |                                                                                                                                                                                                                 | Recording                                                         |
|                                                                                     |                                                                                                                                                                                                                 | Recording, low battery                                            |
|   |                                                                                                                                                                                                                                                                                                  | Not recording:<br>Red = needs charging<br>Green = battery is okay |
|                                                                                     |                                                                                                                                                                                                                | Flat battery needs charging                                       |
|  | <p data-bbox="938 1163 1029 1192"><b>Button</b></p> <p data-bbox="927 1213 1149 1304">Press Once to turn on<br/>(red record light will come on)</p> <p data-bbox="927 1325 1149 1381">Hold to turn off (Red record light turns off)</p> <p data-bbox="927 1423 1094 1453"><b>Camera Lens</b></p> |                                                                   |

Figure 2: Instructions provided to participants regarding the operation of the body-worn camera.

77x112mm (300 x 300 DPI)

---

## Information Booklet for Participants

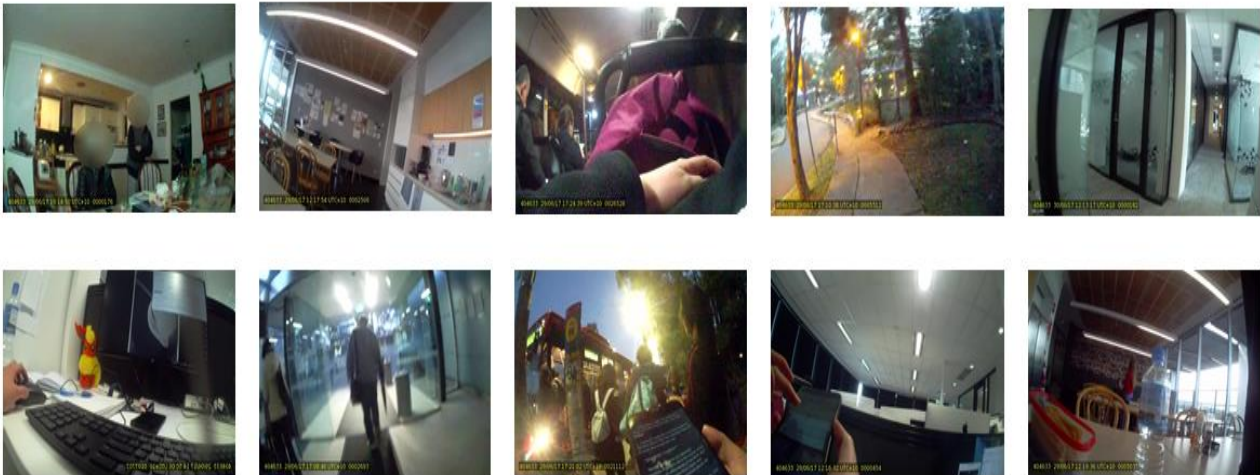

If you have any questions about the study, please contact

Dr Annie Lau

[annie.lau@mq.edu.au](mailto:annie.lau@mq.edu.au)

Telephone: (02) 9850 2436

Dr Kathleen Yin

[kathleen.yin@mq.edu.au](mailto:kathleen.yin@mq.edu.au)

Telephone: (02) 9850 2477

## Information for participants

1  
2  
3  
4  
5 Recently we invited you to take part in a research project investigating the amount of  
6 'patient work' you conduct for Type 2 diabetes and other chronic health conditions. This  
7 information booklet is designed to fully inform you about the project before you agree to  
8 participate.  
9  
10

### ***About the study***

11  
12  
13  
14  
15 Living with a health condition does not come naturally. Following a diagnosis or medical  
16 interventions, patients and their families must undertake extra work to accommodate their  
17 health condition, such as making time to administer medications, visit medical  
18 professionals, or prepare meals.  
19  
20

21  
22 The concept of 'patient work' describes these health-related tasks the patient must  
23 somehow integrate into their daily routine. When integrated poorly, these tasks have the  
24 potential to generate extra stress, contributing to non-compliance, and negatively affecting  
25 the health outcomes of the patient.  
26  
27

28  
29 Type 2 diabetes is known to require significant amounts of patient work on a daily basis,  
30 and for patients who also have other health conditions, the amount of patient work can  
31 increase exponentially.  
32  
33

34  
35 The aim of this study is to observe and document how patient work impacts individuals  
36 with type 2 diabetes and at least one other chronic comorbidity. The goal is gain a better  
37 understanding of the daily routines of those affected by type 2 diabetes and other health  
38 conditions, so that we can understand how to integrate healthcare interventions more  
39 seamlessly into our daily lives in order to improve health outcomes.  
40  
41

### ***Do I have to take part?***

42  
43  
44 You are free to decide whether or not to take part in this study. If you agree, we will ask  
45 you to sign an informed consent form. If you agree and then later decide not to take part,  
46 you can leave the study at any time by advising the researchers of your decision. There will  
47 be no penalty to you for leaving the study at any time.  
48  
49  
50  
51  
52  
53  
54  
55  
56  
57  
58  
59  
60

## ***Who can participate?***

Participants are required to be consenting adults who:

- are able to speak, write and read in English;
- are aged 18 years and older;
- are diagnosed with type 2 diabetes and at least one more chronic health condition;
- are willing to fill in a time-use diary for one day; and
- agree to wear the Edesix body camera on their person for one day.

Exclusion criteria include:

- pregnancy;
- critical illness;
- end-stage disease;
- dementia;
- severe mental disorders that prevent participants from giving consent; or
- needing assistance with basic daily living such as reading, writing, dressing and eating.

## ***What would I have to do?***

If you decide to participate, we will ask you to complete three tasks:

- First, we will ask you to attend a pre-study session at Macquarie University, or a place of your choice (e.g. your home), where you will be given information about the study, provide written consent if you are willing to participate, and complete two questionnaires about your personal information and your health (approximately 5-10 minutes each). (Note: you can do these questionnaires in your own time).

Afterwards, we will ask you to tell us about your health and the activities you do for your health (approximately 1 hour). This interview will be audio recorded for future analysis. You can terminate the interview at any point.

With your permission, we will take photos of your surroundings and the tools you use to manage your health (e.g. medications, devices, home environment), where information identifying you (e.g. names on prescription label) will be masked.

- Next, we will give you two pieces of equipment to collect data about your day (body camera and Time-Use Diary).

We will ask you to fill out a Time-Use Diary for 24 hours, and wear an Edesix body camera during the waking hours of the same day (approximately 8-14 hours).

You are free to remove the camera at any time. Particularly, we recommend you to turn off the camera when anyone (including yourself) is dressing or undressing, using the bathroom or showers, during any situations where privacy is of concern, or any other time that you or others might feel uncomfortable.

If you are in the company of others (e.g. household members, friends and/or acquaintances), we ask you to seek permission from these third parties prior to video recording.

- Soon after data collection, you will be asked to visit the study centre at Macquarie University to return the diary and the data gathering tools, as well as for a post-study reconstruction interview. If you prefer to not travel, the research team will endeavour to visit you at your home (or your preferred location). This session will take approximately 1 hour.

The videos from the body camera will be downloaded onto a secure computer and you will be invited to view them alone. You may delete any or all of them without giving any reason. The researcher will not view any of the videos until you have done this.

We will ask you to look through the videos with us and tell us about your daily activities, especially health-related tasks. This interview will take approximately 30-40 minutes. We will also ask you to fill in a questionnaire about your experiences of wearing the camera and completing the Diary (approximately 10 minutes).

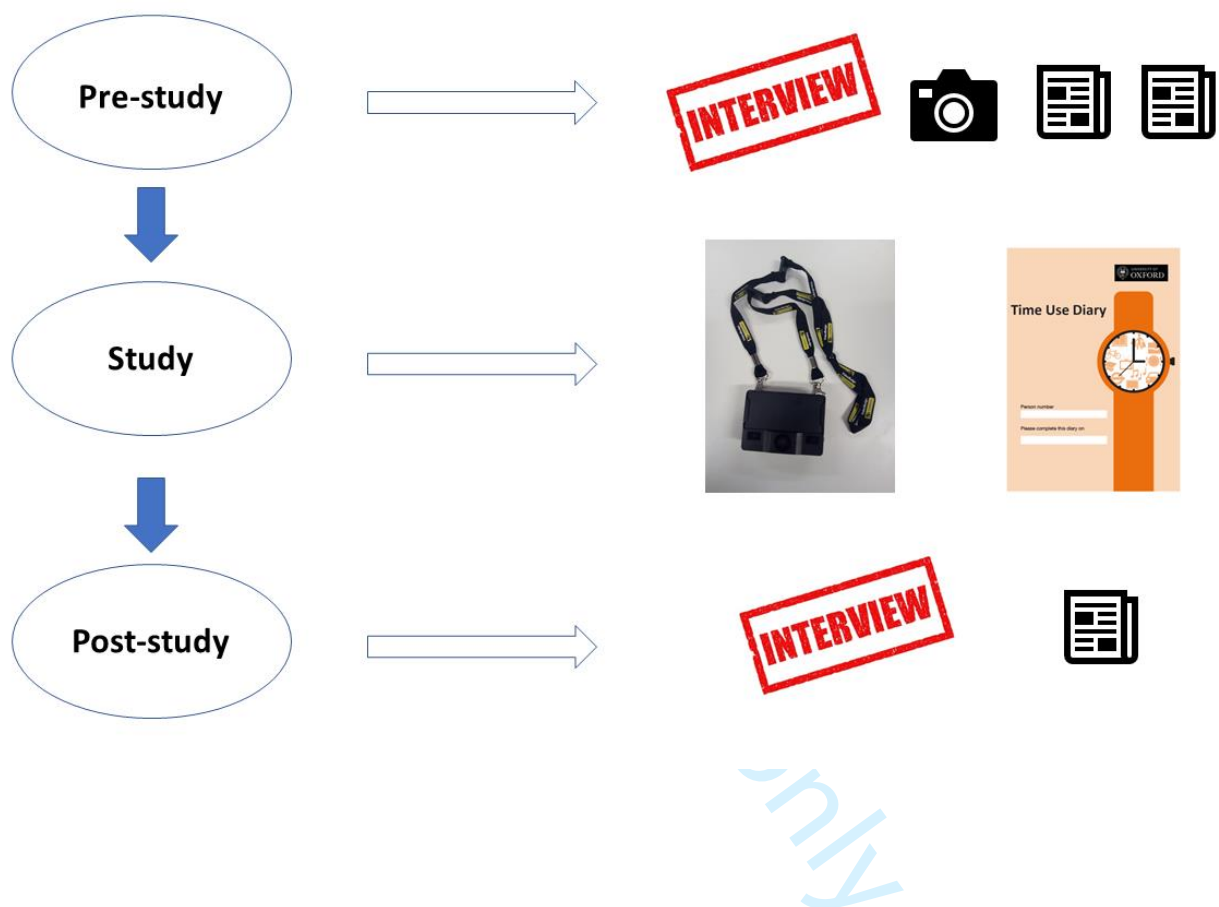

### ***What will happen to the information I provide?***

Your confidentiality will be respected at all times. All your data, including the videos will be stored on a password-protected computer. You will never be identified or have your image shown without your written permission. The results from this research project will be submitted for publication in academic journals and used to inform researchers on future work. Researchers outside this project may request to analyse your anonymised data, but will be required to follow the same highest standards of research integrity and ethics expected of Macquarie University researchers.



## ***Who will conduct the study?***

There are four researchers from Macquarie University conducting this study, who are available to answer any questions or concerns you may have:

- Macquarie University
  - Dr Annie Lau ([annie.lau@mq.edu.au](mailto:annie.lau@mq.edu.au) 02 9850 2436)
  - Dr Kathleen Yin ([kathleen.yin@mq.edu.au](mailto:kathleen.yin@mq.edu.au) 02 9850 2477)
  - Dr Liliana Laranjo ([liliana.laranjo@mq.edu.au](mailto:liliana.laranjo@mq.edu.au) 02 9850 2426)
  - Prof Enrico Coiera ([enrico.coiera@mq.edu.au](mailto:enrico.coiera@mq.edu.au) 02 9850 2403)
  - A/Prof Kenneth Ho
  - Mr Wen Jun Liang (Bachelor of Engineering)
  - Mr Joshua Haddrill (Bachelor of Engineering)
  - Ms Isabelle Barnes (Bachelor of Clinical Science)
  - Mr Joshua Jung (Bachelor of Clinical Science)
  - Mr Christian Tran (Bachelor of Commerce and Arts (Psychology))
  - Mr Jiawei He (Bachelor of Commerce and Arts (Psychology))
- MQ Health General Practice
  - Dr Sanjyot Vagholkar
- University of Oxford
  - Dr Teresa Harms
  - Prof Jonathan Gershuny

## ***What are the possible benefits of taking part in this study?***

You will receive a \$60 shopping voucher as remuneration for participating in the study.



## ***What are the possible disadvantages in taking part in the study?***

We do not anticipate that participating in this project will have any significant effects on your lifestyle. If you do not want to answer any of the questions in the questionnaires or interview, you do not have to. You will also be able to check and delete any videos taken prior to the researchers viewing the videos.

It is possible that while wearing the camera you may be asked about the device by members of the public. In this case we suggest that you say the following:

*“I am volunteering for a research project. The device is a wearable camera and the images will be used to record my daily activities. I am happy to remove it if you would like me to.”*

We will provide you with a wallet-size card that includes this statement and contact information for you to show others if you wish.

Please remember to always prioritise your own personal safety and comfort above the study's requirements.

## ***What happens next?***

If you decide that you do not want to take part in the study, we thank you for taking the time to consider it.

## ***What if there is a problem?***

Approval to conduct this research has been provided by Macquarie University, in accordance with its ethics review and approval procedures. Any person considering participation in this research project, or agreeing to participate, may raise any questions or issues with the researchers at any time. In addition, any person not satisfied with the response of researchers may raise ethics issues or concerns, and may make any complaints about this research project by contacting the Human Research Ethics Committee at Macquarie University on (02) 9850 7854 or by emailing to [ethics@mq.edu.au](mailto:ethics@mq.edu.au).

All research participants are entitled to retain a copy of any Participant Information Form and/or Participant Consent Form relating to this research project.

If you have a concern about any aspect of this project, please speak to a member of the research team: Annie Lau ([annie.lau@mq.edu.au](mailto:annie.lau@mq.edu.au) 02 9850 2436) or Kathleen Yin ([kathleen.yin@mq.edu.au](mailto:kathleen.yin@mq.edu.au) 02 9850 2477).

1  
2  
3  
4  
5  
6  
7  
8  
9  
10  
11  
12  
13  
14  
15  
16  
17  
18  
19  
20  
21  
22  
23  
24  
25  
26  
27  
28  
29  
30  
31  
32  
33  
34  
35  
36  
37  
38  
39  
40  
41  
42  
43  
44  
45  
46  
47  
48  
49  
50  
51  
52  
53  
54  
55  
56  
57  
58  
59  
60

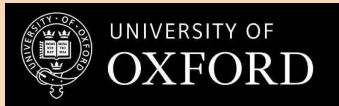

# Time Use Diary

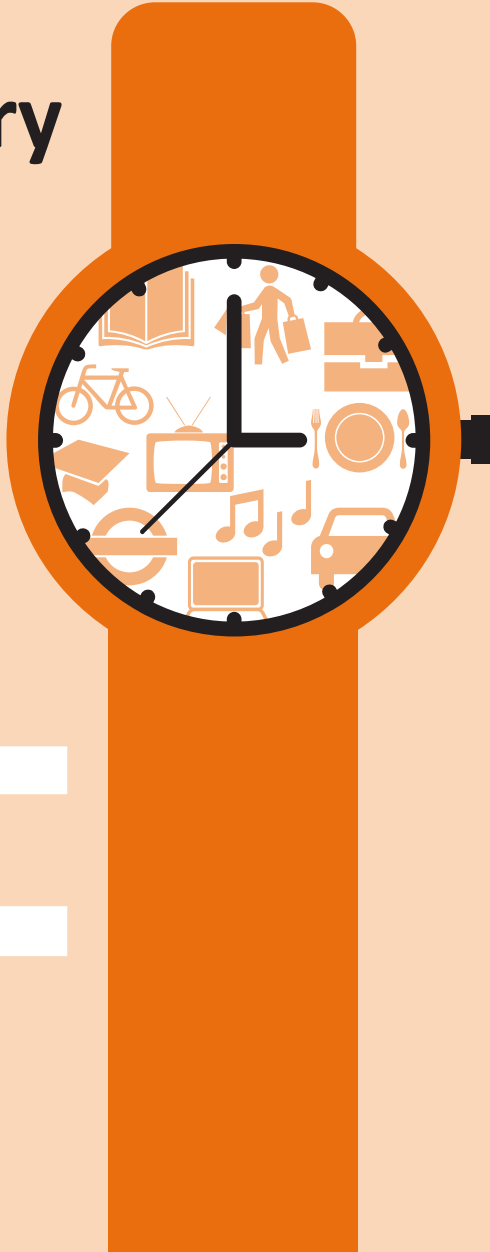

Person number

Please complete this diary on

# Diary instructions

**Please read the instructions below to help you fill in your diary. There is also an example of a filled in diary on the next page to help you.**

## When should I fill in the diary?

- The front of the diary tells you which day we would like you to complete the diary for.
- The diary starts at 4am and covers 24 hours, with three hours on each page.
- Please take the diary with you during the day and fill it in every now and then when you have a spare moment. For example on the bus or train, at lunchtime or while you wait for someone.

## Completing the diary

### What were you doing?

- In this column, record what you consider to be your main activity for each 10 minute period.
- If you were doing more than one activity at the same time, only record the main activity in this column.
- If you did one thing after another during the 10 minutes, record the activity that took the most time.
- If you were doing something you feel is too private to record, please write "personal".

## Work

- You don't need to record exactly what you were doing during work time.
- If you have more than one job, please record which one you were working at.
- Please record what you did during breaks. For example, "Lunch break, had lunch" or "Lunch break, went for a walk".
- Include any work you've taken home and completed at home.

## School / college

- Please record whether you study at home or attend classes / lectures.
- Include the type of study, such as secondary school, university etc.
- If the studies are part of paid work, please note this in the diary.

## Housework and childcare

- Please record what you were really doing. For example, "Cooked supper", "Washed the dishes", "Put my child to bed", "Mowed the lawn", "Cleaned the house", "Washed the car".

## Sleeping

- Please record any occasions during the night when you weren't sleeping. For example, if you have woken up and are doing nothing, reading or caring for children etc.

## Reading

- If you were reading, please record what you read. For example, "Read a newspaper", "Read a magazine", "Read a book".
- If you were reading on a tablet or e-reader such as a Kindle, please remember to fill in the 'Did you use a smartphone, tablet or computer?' column.

## Help to other households

- If you were helping someone who lives outside of your household, either totally or in part, please report this in the diary.
- For example, if you helped a friend repair their house, record this as "Helped friend repairing house". If you bought a neighbour some food while you did your own shopping, please record this too.

## If you did something else at the same time, what else did you do?

- You should use this column to record any activities that you were doing at the same time as your main activity. These are called secondary activities.
- For example, if you were looking after your child (main activity) and watching television at the same time, then you would record "watching television" in this column.
- It is up to you which activity you think is the main activity and which is the secondary activity.
- Don't forget to record secondary activities during lunch or coffee breaks during work or while travelling.

## Did you use a smartphone, tablet or computer?

- Please record in this column whether you were using a smartphone, tablet or computer while you were doing either the main or secondary activity and how long you were using it for. For example, if you were travelling to town on the bus and were checking emails on your smartphone then record how long you were using it for.
- Draw a line or arrow to indicate how long you spent using your smartphone, tablet or computer.

## Where were you?

- This column is to record where you were during the activity and if you were travelling, what your mode of transport was. For example, "at home", "at work", "by car".

## Were you alone or with somebody you know?

- Please indicate whether you were alone or together with somebody you know.
- To be together does not necessarily mean that you actually do things together but rather that somebody else was around.
- Draw a line or arrow to show how long you were alone or with somebody you know. This may change during an activity. For example, somebody might leave or arrive.
- If you were with a child aged 7 years or younger who lives with you, record this in the column 'Children aged 0-7'. If you were with a child aged older than 7 years who lives with you then record this in the 'Other person' column.
- If you were with a relative that doesn't live with you, record this in the 'Others you know' column.

## How much did you enjoy this time?

- Please write in how much you enjoyed the time on a scale of 1 to 7, with 1 meaning you didn't enjoy it at all and 7 meaning that you enjoyed it very much.
- Your level of enjoyment may change during an activity. If so, please record the new level of enjoyment too.

## Checklist

- When you have finished filling in your diary, please answer the checklist questions at the end of the diary day.
- There is also a checklist to remind you of the key things to remember to record.

1  
2  
3  
4  
5  
6  
7  
8  
9  
10  
11  
12  
13  
14  
15  
16  
17  
18  
19  
20  
21  
22  
23  
24  
25  
26  
27  
28  
29  
30  
31  
32  
33  
34  
35  
36  
37  
38  
39  
40  
41  
42  
43  
44  
45  
46  
47  
48  
49  
50  
51  
52  
53  
54  
55  
56  
57  
58  
59  
60

# Example

- Record your main activity for each 10-minute period
- Only one main activity on each line!
- Distinguish between first and second job, if any.
- Distinguish between travel and the activity that is the reason for travelling.
- Don't forget the mode of transport or location and whether you were using a smartphone, tablet or computer.
- Please remember to record who you were with.

- For each 10-minute period, please write in how much you enjoyed this time on a scale of 1 to 7, with 1 meaning you didn't enjoy it at all and 7 meaning that you enjoyed it very much.
- For example, if you didn't enjoy an activity at all then you would write 1 in the box.

This includes children aged 8 and over

## Time: 7am – 10am Morning

| Time: 7am-10am Morning (am) | What were you doing?<br>Please write down one main activity. | If you did something else at the same time, what else did you do? | Did you use a smartphone, tablet, or computer? | Where were you?<br>Location, or mode of transport | Were you alone or with somebody you know?<br>Mark all relevant boxes |                          |                          |                          |                          |                          | How much did you enjoy this time?<br>1 = not at all<br>7 = very much |
|-----------------------------|--------------------------------------------------------------|-------------------------------------------------------------------|------------------------------------------------|---------------------------------------------------|----------------------------------------------------------------------|--------------------------|--------------------------|--------------------------|--------------------------|--------------------------|----------------------------------------------------------------------|
|                             |                                                              |                                                                   |                                                |                                                   | Alone                                                                | Spouse / partner         | Mother                   | Father                   | Child aged 0-7           | Other person             |                                                                      |
| 7am-7.10                    | Woke up the children                                         |                                                                   | <input type="checkbox"/>                       | At home                                           | <input type="checkbox"/>                                             | <input type="checkbox"/> | <input type="checkbox"/> | <input type="checkbox"/> | <input type="checkbox"/> | <input type="checkbox"/> | 5                                                                    |
| 7.10-7.20                   | Had breakfast                                                | checked emails                                                    | <input checked="" type="checkbox"/>            | on foot                                           | <input type="checkbox"/>                                             | <input type="checkbox"/> | <input type="checkbox"/> | <input type="checkbox"/> | <input type="checkbox"/> | <input type="checkbox"/> | 6                                                                    |
| 7.20-7.30                   | "                                                            | Talked with my family                                             | <input type="checkbox"/>                       |                                                   | <input type="checkbox"/>                                             | <input type="checkbox"/> | <input type="checkbox"/> | <input type="checkbox"/> | <input type="checkbox"/> | <input type="checkbox"/> | 5                                                                    |
| 7.30-7.40                   | Cleared the table                                            | Listened to the radio                                             | <input checked="" type="checkbox"/>            |                                                   | <input type="checkbox"/>                                             | <input type="checkbox"/> | <input type="checkbox"/> | <input type="checkbox"/> | <input type="checkbox"/> | <input type="checkbox"/> | 4                                                                    |
| 7.40-7.50                   | Helped the children dressing                                 | Talked with my children                                           | <input type="checkbox"/>                       | on foot                                           | <input checked="" type="checkbox"/>                                  | <input type="checkbox"/> | <input type="checkbox"/> | <input type="checkbox"/> | <input type="checkbox"/> | <input type="checkbox"/> | 7                                                                    |
| 8am-8.10                    | "                                                            |                                                                   | <input type="checkbox"/>                       |                                                   | <input type="checkbox"/>                                             | <input type="checkbox"/> | <input type="checkbox"/> | <input type="checkbox"/> | <input type="checkbox"/> | <input type="checkbox"/> |                                                                      |
| 8.10-8.20                   | Went to the day care centre                                  |                                                                   | <input type="checkbox"/>                       |                                                   | <input type="checkbox"/>                                             | <input type="checkbox"/> | <input type="checkbox"/> | <input type="checkbox"/> | <input type="checkbox"/> | <input type="checkbox"/> | 1                                                                    |

Use an arrow or quote marks to record that an activity lasted longer than 10 minutes.

1  
2  
3  
4  
5  
6  
7  
8  
9  
10  
11  
12  
13  
14  
15  
16  
17  
18  
19  
20  
21  
22  
23  
24  
25  
26  
27  
28  
29  
30  
31  
32  
33  
34  
35  
36  
37  
38  
39  
40  
41  
42  
43  
44  
45  
46  
47  
48  
49  
50  
51  
52  
53  
54  
55  
56  
57  
58  
59  
60

| Time: 4am – 7am<br>Early morning |                                                              | Time: 4am – 7am                                                                                                     |                                                   | Were you alone or with somebody you know?<br>Mark all relevant boxes |                          |                          |                          |                          |                          |                          | How much did you enjoy this time?<br>1 = not at all<br>7 = very much |
|----------------------------------|--------------------------------------------------------------|---------------------------------------------------------------------------------------------------------------------|---------------------------------------------------|----------------------------------------------------------------------|--------------------------|--------------------------|--------------------------|--------------------------|--------------------------|--------------------------|----------------------------------------------------------------------|
|                                  |                                                              |                                                                                                                     |                                                   | People who live with you                                             |                          |                          |                          |                          |                          |                          |                                                                      |
| Time:<br>4am-7am<br>Morning (am) | What were you doing?<br>Please write down one main activity. | Did you use a smartphone, tablet, or computer?<br>If you did something else at the same time, what else did you do? | Where were you?<br>Location, or mode of transport | Alone                                                                | Spouse / partner         | Mother                   | Father                   | Child aged 0-7           | Other person             | Others you know          |                                                                      |
| 4am-4.10                         |                                                              | <input type="checkbox"/>                                                                                            |                                                   | <input type="checkbox"/>                                             | <input type="checkbox"/> | <input type="checkbox"/> | <input type="checkbox"/> | <input type="checkbox"/> | <input type="checkbox"/> | <input type="checkbox"/> |                                                                      |
| 4.10-4.20                        |                                                              | <input type="checkbox"/>                                                                                            |                                                   | <input type="checkbox"/>                                             | <input type="checkbox"/> | <input type="checkbox"/> | <input type="checkbox"/> | <input type="checkbox"/> | <input type="checkbox"/> | <input type="checkbox"/> |                                                                      |
| 4.20-4.30                        |                                                              | <input type="checkbox"/>                                                                                            |                                                   | <input type="checkbox"/>                                             | <input type="checkbox"/> | <input type="checkbox"/> | <input type="checkbox"/> | <input type="checkbox"/> | <input type="checkbox"/> | <input type="checkbox"/> |                                                                      |
| 4.30-4.40                        |                                                              | <input type="checkbox"/>                                                                                            |                                                   | <input type="checkbox"/>                                             | <input type="checkbox"/> | <input type="checkbox"/> | <input type="checkbox"/> | <input type="checkbox"/> | <input type="checkbox"/> | <input type="checkbox"/> |                                                                      |
| 4.40-4.50                        |                                                              | <input type="checkbox"/>                                                                                            |                                                   | <input type="checkbox"/>                                             | <input type="checkbox"/> | <input type="checkbox"/> | <input type="checkbox"/> | <input type="checkbox"/> | <input type="checkbox"/> | <input type="checkbox"/> |                                                                      |
| 4.50-5am                         |                                                              | <input type="checkbox"/>                                                                                            |                                                   | <input type="checkbox"/>                                             | <input type="checkbox"/> | <input type="checkbox"/> | <input type="checkbox"/> | <input type="checkbox"/> | <input type="checkbox"/> | <input type="checkbox"/> |                                                                      |
| 5am-5.10                         |                                                              | <input type="checkbox"/>                                                                                            |                                                   | <input type="checkbox"/>                                             | <input type="checkbox"/> | <input type="checkbox"/> | <input type="checkbox"/> | <input type="checkbox"/> | <input type="checkbox"/> | <input type="checkbox"/> |                                                                      |
| 5.10-5.20                        |                                                              | <input type="checkbox"/>                                                                                            |                                                   | <input type="checkbox"/>                                             | <input type="checkbox"/> | <input type="checkbox"/> | <input type="checkbox"/> | <input type="checkbox"/> | <input type="checkbox"/> | <input type="checkbox"/> |                                                                      |
| 5.20-5.30                        |                                                              | <input type="checkbox"/>                                                                                            |                                                   | <input type="checkbox"/>                                             | <input type="checkbox"/> | <input type="checkbox"/> | <input type="checkbox"/> | <input type="checkbox"/> | <input type="checkbox"/> | <input type="checkbox"/> |                                                                      |
| 5.30-5.40                        |                                                              | <input type="checkbox"/>                                                                                            |                                                   | <input type="checkbox"/>                                             | <input type="checkbox"/> | <input type="checkbox"/> | <input type="checkbox"/> | <input type="checkbox"/> | <input type="checkbox"/> | <input type="checkbox"/> |                                                                      |
| 5.40-5.50                        |                                                              | <input type="checkbox"/>                                                                                            |                                                   | <input type="checkbox"/>                                             | <input type="checkbox"/> | <input type="checkbox"/> | <input type="checkbox"/> | <input type="checkbox"/> | <input type="checkbox"/> | <input type="checkbox"/> |                                                                      |
| 5.50-6am                         |                                                              | <input type="checkbox"/>                                                                                            |                                                   | <input type="checkbox"/>                                             | <input type="checkbox"/> | <input type="checkbox"/> | <input type="checkbox"/> | <input type="checkbox"/> | <input type="checkbox"/> | <input type="checkbox"/> |                                                                      |
| 6am-6.10                         |                                                              | <input type="checkbox"/>                                                                                            |                                                   | <input type="checkbox"/>                                             | <input type="checkbox"/> | <input type="checkbox"/> | <input type="checkbox"/> | <input type="checkbox"/> | <input type="checkbox"/> | <input type="checkbox"/> |                                                                      |
| 6.10-6.20                        |                                                              | <input type="checkbox"/>                                                                                            |                                                   | <input type="checkbox"/>                                             | <input type="checkbox"/> | <input type="checkbox"/> | <input type="checkbox"/> | <input type="checkbox"/> | <input type="checkbox"/> | <input type="checkbox"/> |                                                                      |
| 6.20-6.30                        |                                                              | <input type="checkbox"/>                                                                                            |                                                   | <input type="checkbox"/>                                             | <input type="checkbox"/> | <input type="checkbox"/> | <input type="checkbox"/> | <input type="checkbox"/> | <input type="checkbox"/> | <input type="checkbox"/> |                                                                      |
| 6.30-6.40                        |                                                              | <input type="checkbox"/>                                                                                            |                                                   | <input type="checkbox"/>                                             | <input type="checkbox"/> | <input type="checkbox"/> | <input type="checkbox"/> | <input type="checkbox"/> | <input type="checkbox"/> | <input type="checkbox"/> |                                                                      |
| 6.40-6.50                        |                                                              | <input type="checkbox"/>                                                                                            |                                                   | <input type="checkbox"/>                                             | <input type="checkbox"/> | <input type="checkbox"/> | <input type="checkbox"/> | <input type="checkbox"/> | <input type="checkbox"/> | <input type="checkbox"/> |                                                                      |
| 6.50-7am                         |                                                              | <input type="checkbox"/>                                                                                            |                                                   | <input type="checkbox"/>                                             | <input type="checkbox"/> | <input type="checkbox"/> | <input type="checkbox"/> | <input type="checkbox"/> | <input type="checkbox"/> | <input type="checkbox"/> |                                                                      |

1  
2  
3  
4  
5  
6  
7  
8  
9  
10  
11  
12  
13  
14  
15  
16  
17  
18  
19  
20  
21  
22  
23  
24  
25  
26  
27  
28  
29  
30  
31  
32  
33  
34  
35  
36  
37  
38  
39  
40  
41  
42  
43  
44  
45  
46  
47  
48  
49  
50  
51  
52  
53  
54  
55  
56  
57  
58  
59  
60

| Time: 7am – 10am Morning       |                                                              | Time: 7am – 10am                                                  |                                                | Were you alone or with somebody you know?<br>Mark all relevant boxes |                          |                          |                          |                          |                          |                          | How much did you enjoy this time?<br>1 = not at all<br>7 = very much |
|--------------------------------|--------------------------------------------------------------|-------------------------------------------------------------------|------------------------------------------------|----------------------------------------------------------------------|--------------------------|--------------------------|--------------------------|--------------------------|--------------------------|--------------------------|----------------------------------------------------------------------|
|                                |                                                              |                                                                   |                                                | People who live with you                                             |                          |                          |                          |                          |                          |                          |                                                                      |
| Time:<br>7am-10am Morning (am) | What were you doing?<br>Please write down one main activity. | Did you use anything else at the same time, what else did you do? | Did you use a smartphone, tablet, or computer? | Where were you?<br>Location, or mode of transport                    | Spouse / partner         | Mother                   | Father                   | Child aged 0-7           | Other person             | Others you know          |                                                                      |
| 7am-7.10                       |                                                              |                                                                   | <input type="checkbox"/>                       |                                                                      | <input type="checkbox"/> |                                                                      |
| 7.10-7.20                      |                                                              |                                                                   | <input type="checkbox"/>                       |                                                                      | <input type="checkbox"/> |                                                                      |
| 7.20-7.30                      |                                                              |                                                                   | <input type="checkbox"/>                       |                                                                      | <input type="checkbox"/> |                                                                      |
| 7.30-7.40                      |                                                              |                                                                   | <input type="checkbox"/>                       |                                                                      | <input type="checkbox"/> |                                                                      |
| 7.40-7.50                      |                                                              |                                                                   | <input type="checkbox"/>                       |                                                                      | <input type="checkbox"/> |                                                                      |
| 7.50-8am                       |                                                              |                                                                   | <input type="checkbox"/>                       |                                                                      | <input type="checkbox"/> |                                                                      |
| 8am-8.10                       |                                                              |                                                                   | <input type="checkbox"/>                       |                                                                      | <input type="checkbox"/> |                                                                      |
| 8.10-8.20                      |                                                              |                                                                   | <input type="checkbox"/>                       |                                                                      | <input type="checkbox"/> |                                                                      |
| 8.20-8.30                      |                                                              |                                                                   | <input type="checkbox"/>                       |                                                                      | <input type="checkbox"/> |                                                                      |
| 8.30-8.40                      |                                                              |                                                                   | <input type="checkbox"/>                       |                                                                      | <input type="checkbox"/> |                                                                      |
| 8.40-8.50                      |                                                              |                                                                   | <input type="checkbox"/>                       |                                                                      | <input type="checkbox"/> |                                                                      |
| 8.50-9am                       |                                                              |                                                                   | <input type="checkbox"/>                       |                                                                      | <input type="checkbox"/> |                                                                      |
| 9am-9.10                       |                                                              |                                                                   | <input type="checkbox"/>                       |                                                                      | <input type="checkbox"/> |                                                                      |
| 9.10-9.20                      |                                                              |                                                                   | <input type="checkbox"/>                       |                                                                      | <input type="checkbox"/> |                                                                      |
| 9.20-9.30                      |                                                              |                                                                   | <input type="checkbox"/>                       |                                                                      | <input type="checkbox"/> |                                                                      |
| 9.30-9.40                      |                                                              |                                                                   | <input type="checkbox"/>                       |                                                                      | <input type="checkbox"/> |                                                                      |
| 9.40-9.50                      |                                                              |                                                                   | <input type="checkbox"/>                       |                                                                      | <input type="checkbox"/> |                                                                      |
| 9.50-10am                      |                                                              |                                                                   | <input type="checkbox"/>                       |                                                                      | <input type="checkbox"/> |                                                                      |

| Time: 10am – 1pm<br>Late morning / early afternoon | Time: 10am – 1pm                                             |                                                                                                                     | Were you alone or with somebody you know?<br>Mark all relevant boxes |                          |                          |                          |                          |                          |                          | How much did you enjoy this time?<br>1 = not at all<br>7 = very much |
|----------------------------------------------------|--------------------------------------------------------------|---------------------------------------------------------------------------------------------------------------------|----------------------------------------------------------------------|--------------------------|--------------------------|--------------------------|--------------------------|--------------------------|--------------------------|----------------------------------------------------------------------|
|                                                    | What were you doing?<br>Please write down one main activity. | Did you use a smartphone, tablet, or computer?<br>If you did something else at the same time, what else did you do? | Where were you?<br>Location, or mode of transport                    | Alone                    | Spouse / partner         | Mother                   | Father                   | Child aged 0-7           | Other person             |                                                                      |
| 10am-10.10                                         |                                                              | <input type="checkbox"/>                                                                                            |                                                                      | <input type="checkbox"/> |                                                                      |
| 10.10-10.20                                        |                                                              | <input type="checkbox"/>                                                                                            |                                                                      | <input type="checkbox"/> |                                                                      |
| 10.20-10.30                                        |                                                              | <input type="checkbox"/>                                                                                            |                                                                      | <input type="checkbox"/> |                                                                      |
| 10.30-10.40                                        |                                                              | <input type="checkbox"/>                                                                                            |                                                                      | <input type="checkbox"/> |                                                                      |
| 10.40-10.50                                        |                                                              | <input type="checkbox"/>                                                                                            |                                                                      | <input type="checkbox"/> |                                                                      |
| 10.50-11am                                         |                                                              | <input type="checkbox"/>                                                                                            |                                                                      | <input type="checkbox"/> |                                                                      |
| 11am-11.10                                         |                                                              | <input type="checkbox"/>                                                                                            |                                                                      | <input type="checkbox"/> |                                                                      |
| 11.10-11.20                                        |                                                              | <input type="checkbox"/>                                                                                            |                                                                      | <input type="checkbox"/> |                                                                      |
| 11.20-11.30                                        |                                                              | <input type="checkbox"/>                                                                                            |                                                                      | <input type="checkbox"/> |                                                                      |
| 11.30-11.40                                        |                                                              | <input type="checkbox"/>                                                                                            |                                                                      | <input type="checkbox"/> |                                                                      |
| 11.40-11.50                                        |                                                              | <input type="checkbox"/>                                                                                            |                                                                      | <input type="checkbox"/> |                                                                      |
| 11.50-12pm                                         |                                                              | <input type="checkbox"/>                                                                                            |                                                                      | <input type="checkbox"/> |                                                                      |
| 12pm-12.10                                         |                                                              | <input type="checkbox"/>                                                                                            |                                                                      | <input type="checkbox"/> |                                                                      |
| 12.10-12.20                                        |                                                              | <input type="checkbox"/>                                                                                            |                                                                      | <input type="checkbox"/> |                                                                      |
| 12.20-12.30                                        |                                                              | <input type="checkbox"/>                                                                                            |                                                                      | <input type="checkbox"/> |                                                                      |
| 12.30-12.40                                        |                                                              | <input type="checkbox"/>                                                                                            |                                                                      | <input type="checkbox"/> |                                                                      |
| 12.40-12.50                                        |                                                              | <input type="checkbox"/>                                                                                            |                                                                      | <input type="checkbox"/> |                                                                      |
| 12.50-1pm                                          |                                                              | <input type="checkbox"/>                                                                                            |                                                                      | <input type="checkbox"/> |                                                                      |

| Time: 1pm - 4pm Afternoon             |                                                              | Time: 1pm - 4pm                                                                                                     |                                                   | Were you alone or with somebody you know?<br>Mark all relevant boxes |                          |                          |                          |                          |                          |                          | How much did you enjoy this time?<br>1 = not at all<br>7 = very much |
|---------------------------------------|--------------------------------------------------------------|---------------------------------------------------------------------------------------------------------------------|---------------------------------------------------|----------------------------------------------------------------------|--------------------------|--------------------------|--------------------------|--------------------------|--------------------------|--------------------------|----------------------------------------------------------------------|
|                                       |                                                              |                                                                                                                     |                                                   | People who live with you                                             |                          |                          |                          |                          |                          |                          |                                                                      |
| Time:<br>1pm-4pm<br>Afternoon<br>(pm) | What were you doing?<br>Please write down one main activity. | Did you use a smartphone, tablet, or computer?<br>If you did something else at the same time, what else did you do? | Where were you?<br>Location, or mode of transport | Alone                                                                | Spouse / partner         | Mother                   | Father                   | Child aged 0-7           | Other person             | Others you know          |                                                                      |
| 1pm-1.10                              |                                                              | <input type="checkbox"/>                                                                                            |                                                   | <input type="checkbox"/>                                             | <input type="checkbox"/> | <input type="checkbox"/> | <input type="checkbox"/> | <input type="checkbox"/> | <input type="checkbox"/> | <input type="checkbox"/> |                                                                      |
| 1.10-1.20                             |                                                              | <input type="checkbox"/>                                                                                            |                                                   | <input type="checkbox"/>                                             | <input type="checkbox"/> | <input type="checkbox"/> | <input type="checkbox"/> | <input type="checkbox"/> | <input type="checkbox"/> | <input type="checkbox"/> |                                                                      |
| 1.20-1.30                             |                                                              | <input type="checkbox"/>                                                                                            |                                                   | <input type="checkbox"/>                                             | <input type="checkbox"/> | <input type="checkbox"/> | <input type="checkbox"/> | <input type="checkbox"/> | <input type="checkbox"/> | <input type="checkbox"/> |                                                                      |
| 1.30-1.40                             |                                                              | <input type="checkbox"/>                                                                                            |                                                   | <input type="checkbox"/>                                             | <input type="checkbox"/> | <input type="checkbox"/> | <input type="checkbox"/> | <input type="checkbox"/> | <input type="checkbox"/> | <input type="checkbox"/> |                                                                      |
| 1.40-1.50                             |                                                              | <input type="checkbox"/>                                                                                            |                                                   | <input type="checkbox"/>                                             | <input type="checkbox"/> | <input type="checkbox"/> | <input type="checkbox"/> | <input type="checkbox"/> | <input type="checkbox"/> | <input type="checkbox"/> |                                                                      |
| 1.50-2pm                              |                                                              | <input type="checkbox"/>                                                                                            |                                                   | <input type="checkbox"/>                                             | <input type="checkbox"/> | <input type="checkbox"/> | <input type="checkbox"/> | <input type="checkbox"/> | <input type="checkbox"/> | <input type="checkbox"/> |                                                                      |
| 2pm-2.10                              |                                                              | <input type="checkbox"/>                                                                                            |                                                   | <input type="checkbox"/>                                             | <input type="checkbox"/> | <input type="checkbox"/> | <input type="checkbox"/> | <input type="checkbox"/> | <input type="checkbox"/> | <input type="checkbox"/> |                                                                      |
| 2.10-2.20                             |                                                              | <input type="checkbox"/>                                                                                            |                                                   | <input type="checkbox"/>                                             | <input type="checkbox"/> | <input type="checkbox"/> | <input type="checkbox"/> | <input type="checkbox"/> | <input type="checkbox"/> | <input type="checkbox"/> |                                                                      |
| 2.20-2.30                             |                                                              | <input type="checkbox"/>                                                                                            |                                                   | <input type="checkbox"/>                                             | <input type="checkbox"/> | <input type="checkbox"/> | <input type="checkbox"/> | <input type="checkbox"/> | <input type="checkbox"/> | <input type="checkbox"/> |                                                                      |
| 2.30-2.40                             |                                                              | <input type="checkbox"/>                                                                                            |                                                   | <input type="checkbox"/>                                             | <input type="checkbox"/> | <input type="checkbox"/> | <input type="checkbox"/> | <input type="checkbox"/> | <input type="checkbox"/> | <input type="checkbox"/> |                                                                      |
| 2.40-2.50                             |                                                              | <input type="checkbox"/>                                                                                            |                                                   | <input type="checkbox"/>                                             | <input type="checkbox"/> | <input type="checkbox"/> | <input type="checkbox"/> | <input type="checkbox"/> | <input type="checkbox"/> | <input type="checkbox"/> |                                                                      |
| 2.50-3pm                              |                                                              | <input type="checkbox"/>                                                                                            |                                                   | <input type="checkbox"/>                                             | <input type="checkbox"/> | <input type="checkbox"/> | <input type="checkbox"/> | <input type="checkbox"/> | <input type="checkbox"/> | <input type="checkbox"/> |                                                                      |
| 3pm-3.10                              |                                                              | <input type="checkbox"/>                                                                                            |                                                   | <input type="checkbox"/>                                             | <input type="checkbox"/> | <input type="checkbox"/> | <input type="checkbox"/> | <input type="checkbox"/> | <input type="checkbox"/> | <input type="checkbox"/> |                                                                      |
| 3.10-3.20                             |                                                              | <input type="checkbox"/>                                                                                            |                                                   | <input type="checkbox"/>                                             | <input type="checkbox"/> | <input type="checkbox"/> | <input type="checkbox"/> | <input type="checkbox"/> | <input type="checkbox"/> | <input type="checkbox"/> |                                                                      |
| 3.20-3.30                             |                                                              | <input type="checkbox"/>                                                                                            |                                                   | <input type="checkbox"/>                                             | <input type="checkbox"/> | <input type="checkbox"/> | <input type="checkbox"/> | <input type="checkbox"/> | <input type="checkbox"/> | <input type="checkbox"/> |                                                                      |
| 3.30-3.40                             |                                                              | <input type="checkbox"/>                                                                                            |                                                   | <input type="checkbox"/>                                             | <input type="checkbox"/> | <input type="checkbox"/> | <input type="checkbox"/> | <input type="checkbox"/> | <input type="checkbox"/> | <input type="checkbox"/> |                                                                      |
| 3.40-3.50                             |                                                              | <input type="checkbox"/>                                                                                            |                                                   | <input type="checkbox"/>                                             | <input type="checkbox"/> | <input type="checkbox"/> | <input type="checkbox"/> | <input type="checkbox"/> | <input type="checkbox"/> | <input type="checkbox"/> |                                                                      |
| 3.50-4pm                              |                                                              | <input type="checkbox"/>                                                                                            |                                                   | <input type="checkbox"/>                                             | <input type="checkbox"/> | <input type="checkbox"/> | <input type="checkbox"/> | <input type="checkbox"/> | <input type="checkbox"/> | <input type="checkbox"/> |                                                                      |



1  
2  
3  
4  
5  
6  
7  
8  
9  
10  
11  
12  
13  
14  
15  
16  
17  
18  
19  
20  
21  
22  
23  
24  
25  
26  
27  
28  
29  
30  
31  
32  
33  
34  
35  
36  
37  
38  
39  
40  
41  
42  
43  
44  
45  
46  
47  
48  
49  
50  
51  
52  
53  
54  
55  
56  
57  
58  
59  
60

| Time: 4pm – 7pm<br>Late afternoon / early evening |                                                              | Time: 4pm – 7pm                                |                                                   | Were you alone or with somebody you know?<br>Mark all relevant boxes |                          |                          |                          |                          |                          |  | How much did you enjoy this time?<br>1 = not at all<br>7 = very much |
|---------------------------------------------------|--------------------------------------------------------------|------------------------------------------------|---------------------------------------------------|----------------------------------------------------------------------|--------------------------|--------------------------|--------------------------|--------------------------|--------------------------|--|----------------------------------------------------------------------|
|                                                   |                                                              |                                                |                                                   | People who live with you                                             |                          |                          |                          |                          |                          |  |                                                                      |
| Time:<br>4pm–7pm<br>Afternoon / evening (pm)      | What were you doing?<br>Please write down one main activity. | Did you use a smartphone, tablet, or computer? | Where were you?<br>Location, or mode of transport | Spouse / partner                                                     | Mother                   | Father                   | Child aged 0-7           | Other person             | Others you know          |  |                                                                      |
| 4pm-4.10                                          |                                                              | <input type="checkbox"/>                       |                                                   | <input type="checkbox"/>                                             | <input type="checkbox"/> | <input type="checkbox"/> | <input type="checkbox"/> | <input type="checkbox"/> | <input type="checkbox"/> |  |                                                                      |
| 4.10-4.20                                         |                                                              | <input type="checkbox"/>                       |                                                   | <input type="checkbox"/>                                             | <input type="checkbox"/> | <input type="checkbox"/> | <input type="checkbox"/> | <input type="checkbox"/> | <input type="checkbox"/> |  |                                                                      |
| 4.20-4.30                                         |                                                              | <input type="checkbox"/>                       |                                                   | <input type="checkbox"/>                                             | <input type="checkbox"/> | <input type="checkbox"/> | <input type="checkbox"/> | <input type="checkbox"/> | <input type="checkbox"/> |  |                                                                      |
| 4.30-4.40                                         |                                                              | <input type="checkbox"/>                       |                                                   | <input type="checkbox"/>                                             | <input type="checkbox"/> | <input type="checkbox"/> | <input type="checkbox"/> | <input type="checkbox"/> | <input type="checkbox"/> |  |                                                                      |
| 4.40-4.50                                         |                                                              | <input type="checkbox"/>                       |                                                   | <input type="checkbox"/>                                             | <input type="checkbox"/> | <input type="checkbox"/> | <input type="checkbox"/> | <input type="checkbox"/> | <input type="checkbox"/> |  |                                                                      |
| 4.50-5pm                                          |                                                              | <input type="checkbox"/>                       |                                                   | <input type="checkbox"/>                                             | <input type="checkbox"/> | <input type="checkbox"/> | <input type="checkbox"/> | <input type="checkbox"/> | <input type="checkbox"/> |  |                                                                      |
| 5pm-5.10                                          |                                                              | <input type="checkbox"/>                       |                                                   | <input type="checkbox"/>                                             | <input type="checkbox"/> | <input type="checkbox"/> | <input type="checkbox"/> | <input type="checkbox"/> | <input type="checkbox"/> |  |                                                                      |
| 5.10-5.20                                         |                                                              | <input type="checkbox"/>                       |                                                   | <input type="checkbox"/>                                             | <input type="checkbox"/> | <input type="checkbox"/> | <input type="checkbox"/> | <input type="checkbox"/> | <input type="checkbox"/> |  |                                                                      |
| 5.20-5.30                                         |                                                              | <input type="checkbox"/>                       |                                                   | <input type="checkbox"/>                                             | <input type="checkbox"/> | <input type="checkbox"/> | <input type="checkbox"/> | <input type="checkbox"/> | <input type="checkbox"/> |  |                                                                      |
| 5.30-5.40                                         |                                                              | <input type="checkbox"/>                       |                                                   | <input type="checkbox"/>                                             | <input type="checkbox"/> | <input type="checkbox"/> | <input type="checkbox"/> | <input type="checkbox"/> | <input type="checkbox"/> |  |                                                                      |
| 5.40-5.50                                         |                                                              | <input type="checkbox"/>                       |                                                   | <input type="checkbox"/>                                             | <input type="checkbox"/> | <input type="checkbox"/> | <input type="checkbox"/> | <input type="checkbox"/> | <input type="checkbox"/> |  |                                                                      |
| 5.50-6pm                                          |                                                              | <input type="checkbox"/>                       |                                                   | <input type="checkbox"/>                                             | <input type="checkbox"/> | <input type="checkbox"/> | <input type="checkbox"/> | <input type="checkbox"/> | <input type="checkbox"/> |  |                                                                      |
| 6pm-6.10                                          |                                                              | <input type="checkbox"/>                       |                                                   | <input type="checkbox"/>                                             | <input type="checkbox"/> | <input type="checkbox"/> | <input type="checkbox"/> | <input type="checkbox"/> | <input type="checkbox"/> |  |                                                                      |
| 6.10-6.20                                         |                                                              | <input type="checkbox"/>                       |                                                   | <input type="checkbox"/>                                             | <input type="checkbox"/> | <input type="checkbox"/> | <input type="checkbox"/> | <input type="checkbox"/> | <input type="checkbox"/> |  |                                                                      |
| 6.20-6.30                                         |                                                              | <input type="checkbox"/>                       |                                                   | <input type="checkbox"/>                                             | <input type="checkbox"/> | <input type="checkbox"/> | <input type="checkbox"/> | <input type="checkbox"/> | <input type="checkbox"/> |  |                                                                      |
| 6.30-6.40                                         |                                                              | <input type="checkbox"/>                       |                                                   | <input type="checkbox"/>                                             | <input type="checkbox"/> | <input type="checkbox"/> | <input type="checkbox"/> | <input type="checkbox"/> | <input type="checkbox"/> |  |                                                                      |
| 6.40-6.50                                         |                                                              | <input type="checkbox"/>                       |                                                   | <input type="checkbox"/>                                             | <input type="checkbox"/> | <input type="checkbox"/> | <input type="checkbox"/> | <input type="checkbox"/> | <input type="checkbox"/> |  |                                                                      |
| 6.50-7pm                                          |                                                              | <input type="checkbox"/>                       |                                                   | <input type="checkbox"/>                                             | <input type="checkbox"/> | <input type="checkbox"/> | <input type="checkbox"/> | <input type="checkbox"/> | <input type="checkbox"/> |  |                                                                      |

1  
2  
3  
4  
5  
6  
7  
8  
9  
10  
11  
12  
13  
14  
15  
16  
17  
18  
19  
20  
21  
22  
23  
24  
25  
26  
27  
28  
29  
30  
31  
32  
33  
34  
35  
36  
37  
38  
39  
40  
41  
42  
43  
44  
45  
46  
47  
48  
49  
50  
51  
52  
53  
54  
55  
56  
57  
58  
59  
60

| Time: 7pm – 10pm Evening          |                                                              | Time: 7pm – 10pm                                                                                                    |                                                   | Were you alone or with somebody you know?<br>Mark all relevant boxes |                          |                          |                          |                          |                          |                          |                          |                          |                          | How much did you enjoy this time?<br>1 = not at all<br>7 = very much |                          |                          |
|-----------------------------------|--------------------------------------------------------------|---------------------------------------------------------------------------------------------------------------------|---------------------------------------------------|----------------------------------------------------------------------|--------------------------|--------------------------|--------------------------|--------------------------|--------------------------|--------------------------|--------------------------|--------------------------|--------------------------|----------------------------------------------------------------------|--------------------------|--------------------------|
|                                   |                                                              |                                                                                                                     |                                                   | People who live with you                                             |                          |                          |                          |                          |                          | Others you know          |                          |                          |                          |                                                                      |                          |                          |
| Time:<br>7pm-10pm<br>Evening (pm) | What were you doing?<br>Please write down one main activity. | Did you use a smartphone, tablet, or computer?<br>If you did something else at the same time, what else did you do? | Where were you?<br>Location, or mode of transport | Spouse / partner                                                     | Mother                   | Father                   | Child aged 0-7           | Other person             | Others you know          | 1                        | 2                        | 3                        | 4                        | 5                                                                    | 6                        | 7                        |
| 7pm-7.10                          |                                                              | <input type="checkbox"/>                                                                                            |                                                   | <input type="checkbox"/>                                             | <input type="checkbox"/> | <input type="checkbox"/> | <input type="checkbox"/> | <input type="checkbox"/> | <input type="checkbox"/> | <input type="checkbox"/> | <input type="checkbox"/> | <input type="checkbox"/> | <input type="checkbox"/> | <input type="checkbox"/>                                             | <input type="checkbox"/> | <input type="checkbox"/> |
| 7.10-7.20                         |                                                              | <input type="checkbox"/>                                                                                            |                                                   | <input type="checkbox"/>                                             | <input type="checkbox"/> | <input type="checkbox"/> | <input type="checkbox"/> | <input type="checkbox"/> | <input type="checkbox"/> | <input type="checkbox"/> | <input type="checkbox"/> | <input type="checkbox"/> | <input type="checkbox"/> | <input type="checkbox"/>                                             | <input type="checkbox"/> | <input type="checkbox"/> |
| 7.20-7.30                         |                                                              | <input type="checkbox"/>                                                                                            |                                                   | <input type="checkbox"/>                                             | <input type="checkbox"/> | <input type="checkbox"/> | <input type="checkbox"/> | <input type="checkbox"/> | <input type="checkbox"/> | <input type="checkbox"/> | <input type="checkbox"/> | <input type="checkbox"/> | <input type="checkbox"/> | <input type="checkbox"/>                                             | <input type="checkbox"/> | <input type="checkbox"/> |
| 7.30-7.40                         |                                                              | <input type="checkbox"/>                                                                                            |                                                   | <input type="checkbox"/>                                             | <input type="checkbox"/> | <input type="checkbox"/> | <input type="checkbox"/> | <input type="checkbox"/> | <input type="checkbox"/> | <input type="checkbox"/> | <input type="checkbox"/> | <input type="checkbox"/> | <input type="checkbox"/> | <input type="checkbox"/>                                             | <input type="checkbox"/> | <input type="checkbox"/> |
| 7.40-7.50                         |                                                              | <input type="checkbox"/>                                                                                            |                                                   | <input type="checkbox"/>                                             | <input type="checkbox"/> | <input type="checkbox"/> | <input type="checkbox"/> | <input type="checkbox"/> | <input type="checkbox"/> | <input type="checkbox"/> | <input type="checkbox"/> | <input type="checkbox"/> | <input type="checkbox"/> | <input type="checkbox"/>                                             | <input type="checkbox"/> | <input type="checkbox"/> |
| 7.50-8pm                          |                                                              | <input type="checkbox"/>                                                                                            |                                                   | <input type="checkbox"/>                                             | <input type="checkbox"/> | <input type="checkbox"/> | <input type="checkbox"/> | <input type="checkbox"/> | <input type="checkbox"/> | <input type="checkbox"/> | <input type="checkbox"/> | <input type="checkbox"/> | <input type="checkbox"/> | <input type="checkbox"/>                                             | <input type="checkbox"/> | <input type="checkbox"/> |
| 8pm-8.10                          |                                                              | <input type="checkbox"/>                                                                                            |                                                   | <input type="checkbox"/>                                             | <input type="checkbox"/> | <input type="checkbox"/> | <input type="checkbox"/> | <input type="checkbox"/> | <input type="checkbox"/> | <input type="checkbox"/> | <input type="checkbox"/> | <input type="checkbox"/> | <input type="checkbox"/> | <input type="checkbox"/>                                             | <input type="checkbox"/> | <input type="checkbox"/> |
| 8.10-8.20                         |                                                              | <input type="checkbox"/>                                                                                            |                                                   | <input type="checkbox"/>                                             | <input type="checkbox"/> | <input type="checkbox"/> | <input type="checkbox"/> | <input type="checkbox"/> | <input type="checkbox"/> | <input type="checkbox"/> | <input type="checkbox"/> | <input type="checkbox"/> | <input type="checkbox"/> | <input type="checkbox"/>                                             | <input type="checkbox"/> | <input type="checkbox"/> |
| 8.20-8.30                         |                                                              | <input type="checkbox"/>                                                                                            |                                                   | <input type="checkbox"/>                                             | <input type="checkbox"/> | <input type="checkbox"/> | <input type="checkbox"/> | <input type="checkbox"/> | <input type="checkbox"/> | <input type="checkbox"/> | <input type="checkbox"/> | <input type="checkbox"/> | <input type="checkbox"/> | <input type="checkbox"/>                                             | <input type="checkbox"/> | <input type="checkbox"/> |
| 8.30-8.40                         |                                                              | <input type="checkbox"/>                                                                                            |                                                   | <input type="checkbox"/>                                             | <input type="checkbox"/> | <input type="checkbox"/> | <input type="checkbox"/> | <input type="checkbox"/> | <input type="checkbox"/> | <input type="checkbox"/> | <input type="checkbox"/> | <input type="checkbox"/> | <input type="checkbox"/> | <input type="checkbox"/>                                             | <input type="checkbox"/> | <input type="checkbox"/> |
| 8.40-8.50                         |                                                              | <input type="checkbox"/>                                                                                            |                                                   | <input type="checkbox"/>                                             | <input type="checkbox"/> | <input type="checkbox"/> | <input type="checkbox"/> | <input type="checkbox"/> | <input type="checkbox"/> | <input type="checkbox"/> | <input type="checkbox"/> | <input type="checkbox"/> | <input type="checkbox"/> | <input type="checkbox"/>                                             | <input type="checkbox"/> | <input type="checkbox"/> |
| 8.50-9pm                          |                                                              | <input type="checkbox"/>                                                                                            |                                                   | <input type="checkbox"/>                                             | <input type="checkbox"/> | <input type="checkbox"/> | <input type="checkbox"/> | <input type="checkbox"/> | <input type="checkbox"/> | <input type="checkbox"/> | <input type="checkbox"/> | <input type="checkbox"/> | <input type="checkbox"/> | <input type="checkbox"/>                                             | <input type="checkbox"/> | <input type="checkbox"/> |
| 9pm-9.10                          |                                                              | <input type="checkbox"/>                                                                                            |                                                   | <input type="checkbox"/>                                             | <input type="checkbox"/> | <input type="checkbox"/> | <input type="checkbox"/> | <input type="checkbox"/> | <input type="checkbox"/> | <input type="checkbox"/> | <input type="checkbox"/> | <input type="checkbox"/> | <input type="checkbox"/> | <input type="checkbox"/>                                             | <input type="checkbox"/> | <input type="checkbox"/> |
| 9.10-9.20                         |                                                              | <input type="checkbox"/>                                                                                            |                                                   | <input type="checkbox"/>                                             | <input type="checkbox"/> | <input type="checkbox"/> | <input type="checkbox"/> | <input type="checkbox"/> | <input type="checkbox"/> | <input type="checkbox"/> | <input type="checkbox"/> | <input type="checkbox"/> | <input type="checkbox"/> | <input type="checkbox"/>                                             | <input type="checkbox"/> | <input type="checkbox"/> |
| 9.20-9.30                         |                                                              | <input type="checkbox"/>                                                                                            |                                                   | <input type="checkbox"/>                                             | <input type="checkbox"/> | <input type="checkbox"/> | <input type="checkbox"/> | <input type="checkbox"/> | <input type="checkbox"/> | <input type="checkbox"/> | <input type="checkbox"/> | <input type="checkbox"/> | <input type="checkbox"/> | <input type="checkbox"/>                                             | <input type="checkbox"/> | <input type="checkbox"/> |
| 9.30-9.40                         |                                                              | <input type="checkbox"/>                                                                                            |                                                   | <input type="checkbox"/>                                             | <input type="checkbox"/> | <input type="checkbox"/> | <input type="checkbox"/> | <input type="checkbox"/> | <input type="checkbox"/> | <input type="checkbox"/> | <input type="checkbox"/> | <input type="checkbox"/> | <input type="checkbox"/> | <input type="checkbox"/>                                             | <input type="checkbox"/> | <input type="checkbox"/> |
| 9.40-9.50                         |                                                              | <input type="checkbox"/>                                                                                            |                                                   | <input type="checkbox"/>                                             | <input type="checkbox"/> | <input type="checkbox"/> | <input type="checkbox"/> | <input type="checkbox"/> | <input type="checkbox"/> | <input type="checkbox"/> | <input type="checkbox"/> | <input type="checkbox"/> | <input type="checkbox"/> | <input type="checkbox"/>                                             | <input type="checkbox"/> | <input type="checkbox"/> |
| 9.50-10pm                         |                                                              | <input type="checkbox"/>                                                                                            |                                                   | <input type="checkbox"/>                                             | <input type="checkbox"/> | <input type="checkbox"/> | <input type="checkbox"/> | <input type="checkbox"/> | <input type="checkbox"/> | <input type="checkbox"/> | <input type="checkbox"/> | <input type="checkbox"/> | <input type="checkbox"/> | <input type="checkbox"/>                                             | <input type="checkbox"/> | <input type="checkbox"/> |

1  
2  
3  
4  
5  
6  
7  
8  
9  
10  
11  
12  
13  
14  
15  
16  
17  
18  
19  
20  
21  
22  
23  
24  
25  
26  
27  
28  
29  
30  
31  
32  
33  
34  
35  
36  
37  
38  
39  
40  
41  
42  
43  
44  
45  
46  
47  
48  
49  
50  
51  
52  
53  
54  
55  
56  
57  
58  
59  
60

| Time: 10pm – 1am<br>Night    |  | Time: 10pm – 1am                                             |                                                                                                                     | Were you alone or with somebody you know?<br>Mark all relevant boxes |                          |                          |                          |                          |                          |                          | How much did you enjoy this time?<br>1 = not at all<br>7 = very much |                          |  |
|------------------------------|--|--------------------------------------------------------------|---------------------------------------------------------------------------------------------------------------------|----------------------------------------------------------------------|--------------------------|--------------------------|--------------------------|--------------------------|--------------------------|--------------------------|----------------------------------------------------------------------|--------------------------|--|
|                              |  | What were you doing?<br>Please write down one main activity. | Did you use a smartphone, tablet, or computer?<br>If you did something else at the same time, what else did you do? | Where were you?<br>Location, or mode of transport                    | Alone                    | Spouse / partner         | Mother                   | Father                   | Child aged 0-7           | Other person             |                                                                      | Others you know          |  |
| 10pm-1am<br>Night<br>(pm/am) |  |                                                              |                                                                                                                     |                                                                      | <input type="checkbox"/>                                             | <input type="checkbox"/> |  |
| 10pm-10.10                   |  |                                                              |                                                                                                                     |                                                                      | <input type="checkbox"/>                                             | <input type="checkbox"/> |  |
| 10.10-10.20                  |  |                                                              |                                                                                                                     |                                                                      | <input type="checkbox"/>                                             | <input type="checkbox"/> |  |
| 10.20-10.30                  |  |                                                              |                                                                                                                     |                                                                      | <input type="checkbox"/>                                             | <input type="checkbox"/> |  |
| 10.30-10.40                  |  |                                                              |                                                                                                                     |                                                                      | <input type="checkbox"/>                                             | <input type="checkbox"/> |  |
| 10.40-10.50                  |  |                                                              |                                                                                                                     |                                                                      | <input type="checkbox"/>                                             | <input type="checkbox"/> |  |
| 10.50-11pm                   |  |                                                              |                                                                                                                     |                                                                      | <input type="checkbox"/>                                             | <input type="checkbox"/> |  |
| 11pm-11.10                   |  |                                                              |                                                                                                                     |                                                                      | <input type="checkbox"/>                                             | <input type="checkbox"/> |  |
| 11.10-11.20                  |  |                                                              |                                                                                                                     |                                                                      | <input type="checkbox"/>                                             | <input type="checkbox"/> |  |
| 11.20-11.30                  |  |                                                              |                                                                                                                     |                                                                      | <input type="checkbox"/>                                             | <input type="checkbox"/> |  |
| 11.30-11.40                  |  |                                                              |                                                                                                                     |                                                                      | <input type="checkbox"/>                                             | <input type="checkbox"/> |  |
| 11.40-11.50                  |  |                                                              |                                                                                                                     |                                                                      | <input type="checkbox"/>                                             | <input type="checkbox"/> |  |
| 11.50-12am                   |  |                                                              |                                                                                                                     |                                                                      | <input type="checkbox"/>                                             | <input type="checkbox"/> |  |
| 12am-12.10                   |  |                                                              |                                                                                                                     |                                                                      | <input type="checkbox"/>                                             | <input type="checkbox"/> |  |
| 12.10-12.20                  |  |                                                              |                                                                                                                     |                                                                      | <input type="checkbox"/>                                             | <input type="checkbox"/> |  |
| 12.20-12.30                  |  |                                                              |                                                                                                                     |                                                                      | <input type="checkbox"/>                                             | <input type="checkbox"/> |  |
| 12.30-12.40                  |  |                                                              |                                                                                                                     |                                                                      | <input type="checkbox"/>                                             | <input type="checkbox"/> |  |
| 12.40-12.50                  |  |                                                              |                                                                                                                     |                                                                      | <input type="checkbox"/>                                             | <input type="checkbox"/> |  |
| 12.50-1am                    |  |                                                              |                                                                                                                     |                                                                      | <input type="checkbox"/>                                             | <input type="checkbox"/> |  |

1  
2  
3  
4  
5  
6  
7  
8  
9  
10  
11  
12  
13  
14  
15  
16  
17  
18  
19  
20  
21  
22  
23  
24  
25  
26  
27  
28  
29  
30  
31  
32  
33  
34  
35  
36  
37  
38  
39  
40  
41  
42  
43  
44  
45  
46  
47  
48  
49  
50  
51  
52  
53  
54  
55  
56  
57  
58  
59  
60

| Time: 1am – 4am Night    |                                                              | Time: 1am – 4am                                                   |                                                | Were you alone or with somebody you know?<br>Mark all relevant boxes |                          |                          |                          |                          |                          |                          |                          |                          |                          |                          |                          |                          |                                                                      |
|--------------------------|--------------------------------------------------------------|-------------------------------------------------------------------|------------------------------------------------|----------------------------------------------------------------------|--------------------------|--------------------------|--------------------------|--------------------------|--------------------------|--------------------------|--------------------------|--------------------------|--------------------------|--------------------------|--------------------------|--------------------------|----------------------------------------------------------------------|
|                          |                                                              |                                                                   |                                                | People who live with you                                             |                          |                          |                          |                          |                          | Others you know          |                          |                          |                          |                          |                          |                          | How much did you enjoy this time?<br>1 = not at all<br>7 = very much |
| Time: 1am–4am Night (am) | What were you doing?<br>Please write down one main activity. | Did you do something else at the same time, what else did you do? | Did you use a smartphone, tablet, or computer? | Where were you?<br>Location, or mode of transport                    | Spouse / partner         | Mother                   | Father                   | Child aged 0-7           | Other person             | Know                     | 1                        | 2                        | 3                        | 4                        | 5                        | 6                        | 7                                                                    |
| 1am-1.10                 |                                                              |                                                                   | <input type="checkbox"/>                       |                                                                      | <input type="checkbox"/>                                             |
| 1.10-1.20                |                                                              |                                                                   | <input type="checkbox"/>                       |                                                                      | <input type="checkbox"/>                                             |
| 1.20-1.30                |                                                              |                                                                   | <input type="checkbox"/>                       |                                                                      | <input type="checkbox"/>                                             |
| 1.30-1.40                |                                                              |                                                                   | <input type="checkbox"/>                       |                                                                      | <input type="checkbox"/>                                             |
| 1.40-1.50                |                                                              |                                                                   | <input type="checkbox"/>                       |                                                                      | <input type="checkbox"/>                                             |
| 1.50-2am                 |                                                              |                                                                   | <input type="checkbox"/>                       |                                                                      | <input type="checkbox"/>                                             |
| 2am-2.10                 |                                                              |                                                                   | <input type="checkbox"/>                       |                                                                      | <input type="checkbox"/>                                             |
| 2.10-2.20                |                                                              |                                                                   | <input type="checkbox"/>                       |                                                                      | <input type="checkbox"/>                                             |
| 2.20-2.30                |                                                              |                                                                   | <input type="checkbox"/>                       |                                                                      | <input type="checkbox"/>                                             |
| 2.30-2.40                |                                                              |                                                                   | <input type="checkbox"/>                       |                                                                      | <input type="checkbox"/>                                             |
| 2.40-2.50                |                                                              |                                                                   | <input type="checkbox"/>                       |                                                                      | <input type="checkbox"/>                                             |
| 2.50-3am                 |                                                              |                                                                   | <input type="checkbox"/>                       |                                                                      | <input type="checkbox"/>                                             |
| 3am-3.10                 |                                                              |                                                                   | <input type="checkbox"/>                       |                                                                      | <input type="checkbox"/>                                             |
| 3.10-3.20                |                                                              |                                                                   | <input type="checkbox"/>                       |                                                                      | <input type="checkbox"/>                                             |
| 3.20-3.30                |                                                              |                                                                   | <input type="checkbox"/>                       |                                                                      | <input type="checkbox"/>                                             |
| 3.30-3.40                |                                                              |                                                                   | <input type="checkbox"/>                       |                                                                      | <input type="checkbox"/>                                             |
| 3.40-3.50                |                                                              |                                                                   | <input type="checkbox"/>                       |                                                                      | <input type="checkbox"/>                                             |
| 3.50-4am                 |                                                              |                                                                   | <input type="checkbox"/>                       |                                                                      | <input type="checkbox"/>                                             |

## Diary Checklist

- Please go through the diary again and check the following:**
1. When did you fill in the diary ?
    1. Now and then during the diary day
    2. At the end of the diary day
    3. The day after the diary day
  2. Did you feel rushed this day?
    1. Yes
    2. No
  3. Was this an ordinary or an unusual day?
    1. An ordinary day
    2. An unusual day
  4. What kind of day was this day?
    1. A workday
    2. A school or college day
    3. A day off
    4. A sick leave day
    5. An annual leave day
    6. On leave for other reasons
    7. None of the above

- Please check that you have noted only one main activity on each line and that there are no empty time periods.

- Have you marked clearly your employment working hours, even if you worked at home?

- Have you recorded all travel and modes of transport?

- Have you marked the duration of secondary activities, if any?

- Please check that you have always completed the 'Were you alone or with somebody you know' column.

1  
2  
3  
4  
5  
6  
7  
8  
9  
10  
11  
12  
13  
14  
15  
16  
17  
18  
19  
20  
21  
22  
23  
24  
25  
26  
27  
28  
29  
30  
31  
32  
33  
34  
35  
36  
37  
38  
39  
40  
41  
42  
43  
44  
45  
46  
47  
48  
49  
50  
51  
52  
53  
54  
55  
56  
57  
58  
59  
60

**Participant Information Questionnaire**

**Date:** \_\_\_\_\_

**\*Email:** \_\_\_\_\_

**Date of Birth:** \_\_\_\_\_ **Sex** : \_\_\_\_\_

**Health conditions:** \_\_\_\_\_

**List of medications being taken:** \_\_\_\_\_

**Length of time since diagnosis:** \_\_\_\_\_

For peer review only

1  
2  
3  
4  
5  
6  
7  
8  
9  
10  
11  
12  
13  
14  
15

### What is your employment status?

- 16  
17  
18  
19  
20  
21  
22  
23  
24  
25  
26  
27  
28  
29  
30  
31  
32  
33
- |                          |                                                                      |                          |                          |
|--------------------------|----------------------------------------------------------------------|--------------------------|--------------------------|
| <input type="checkbox"/> | In paid employment                                                   | <input type="checkbox"/> | Unpaid work experience   |
| <input type="checkbox"/> | Full-time student                                                    | <input type="checkbox"/> | Retired                  |
| <input type="checkbox"/> | Unemployed (not on leave)                                            | <input type="checkbox"/> | On parental leave        |
| <input type="checkbox"/> | Doing domestic work (homemaking,<br>looking after the children etc.) | <input type="checkbox"/> | Other (specify)<br>_____ |

### Would you like to be contacted to receive feedback on the study?

Yes  No

### Would you like to be contacted for future research?

Yes  No

34  
35  
36  
37  
38  
39  
40  
41  
42  
43  
44  
45  
46  
47  
48  
49  
50  
51  
52  
53  
54  
55  
56  
57  
58  
59  
60

**\*Please note, all of the information in this questionnaire, including contact information, will only be used for research purposes and will not be passed on to third parties.**

### The Multimorbidity Illness Perceptions Scale (MULTIPLEs)

These questions are about the thoughts and feelings that people with multiple long-term conditions sometimes experience. Please indicate how much you agree with each statement by circling one number.

Strongly Disagree  $\longrightarrow$  Strongly Agree

|    |                                                                                                |   |   |   |   |
|----|------------------------------------------------------------------------------------------------|---|---|---|---|
| 1  | One of my conditions is more serious than the others.                                          | 0 | 1 | 2 | 3 |
| 2  | Time spent managing my conditions has made it more difficult to carry out my usual activities. | 0 | 1 | 2 | 3 |
| 3  | I feel so overwhelmed by the treatment for one condition it is hard to manage any others.      | 0 | 1 | 2 | 3 |
| 4  | The causes of my conditions are linked.                                                        | 0 | 1 | 2 | 3 |
| 5  | It is difficult to take all my medications the way I am supposed to.                           | 0 | 1 | 2 | 3 |
| 6  | Time spent managing my condition has limited my activities.                                    | 0 | 1 | 2 | 3 |
| 7  | One of my conditions is more worrying than the others.                                         | 0 | 1 | 2 | 3 |
| 8  | Taking different medications for each of my conditions has caused me problems.                 | 0 | 1 | 2 | 3 |
| 9  | I don't like mixing medications for different conditions.                                      | 0 | 1 | 2 | 3 |
| 10 | Having more than one condition makes my treatments less effective.                             | 0 | 1 | 2 | 3 |
| 11 | One of my conditions has caused another.                                                       | 0 | 1 | 2 | 3 |
| 12 | One of my conditions dominates the others.                                                     | 0 | 1 | 2 | 3 |
| 13 | My conditions interact with each other.                                                        | 0 | 1 | 2 | 3 |
| 14 | Having more than one condition makes it difficult to get the best available treatment.         | 0 | 1 | 2 | 3 |
| 15 | Time spent managing my conditions has reduced my social life.                                  | 0 | 1 | 2 | 3 |
| 16 | One of my conditions has more of an impact on my life.                                         | 0 | 1 | 2 | 3 |

Strongly Disagree  $\longrightarrow$  Strongly Agree

|    |                                                                   |   |   |   |   |   |   |
|----|-------------------------------------------------------------------|---|---|---|---|---|---|
| 17 | Having more than one condition makes me unhappy.                  | 0 | 1 | 2 | 3 | 4 | 5 |
| 18 | Having more than one condition makes me more anxious.             | 0 | 1 | 2 | 3 | 4 | 5 |
| 19 | Having more than one condition makes me angry or frustrated.      | 0 | 1 | 2 | 3 | 4 | 5 |
| 20 | Having more than one health problem makes me feel sad.            | 0 | 1 | 2 | 3 | 4 | 5 |
| 21 | Having more than one condition makes me more irritable.           | 0 | 1 | 2 | 3 | 4 | 5 |
| 22 | If I feel sad or depressed, managing my conditions is a struggle. | 0 | 1 | 2 | 3 | 4 | 5 |



## PARTICIPANT EXPERIENCE SURVEY

### EDESIX BODY CAMERA

***Did you experience any of the following problems while you were wearing the camera?***

|                                                              | Never | Some-times | Often | Always |
|--------------------------------------------------------------|-------|------------|-------|--------|
| Forgetting to wear the camera                                |       |            |       |        |
| People’s reaction to me wearing the camera                   |       |            |       |        |
| Discomfort wearing the camera                                |       |            |       |        |
| Problems with the camera slipping/moving about               |       |            |       |        |
| Difficulty understanding the camera instructions             |       |            |       |        |
| Frustration with the length of time I had to wear the camera |       |            |       |        |
| Being uncertain about whether the camera was turned on       |       |            |       |        |

Do you have any additional comments about your experience of wearing the camera?

---



---



---



---

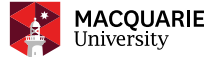

1  
2  
3  
4  
5  
6  
7  
8  
9  
10  
11  
12  
13  
14  
15  
16  
17  
18  
19  
20  
21  
22  
23  
24  
25  
26  
27  
28  
29  
30  
31  
32  
33  
34  
35  
36  
37  
38  
39  
40  
41  
42  
43  
44  
45  
46  
47

### TIME USE DIARY

| <i>Did you experience any of these problems when completing the diary?</i> |       |            |       |        |
|----------------------------------------------------------------------------|-------|------------|-------|--------|
|                                                                            | Never | Some-times | Often | Always |
| Remembering to fill in the diary                                           |       |            |       |        |
| Forgetting what I did during the day/evening                               |       |            |       |        |
| The length of time it took to complete the diary                           |       |            |       |        |
| Completing all sections of the diary                                       |       |            |       |        |
| Understanding the diary instructions                                       |       |            |       |        |

Do you have any additional comments about your experience of completing the time use diary?

---



---



---



---

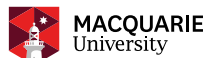

1  
2 **PARTICIPATING IN THE STUDY**  
3

4 Were there any aspects of the study that you particularly enjoyed?  
5  
6 \_\_\_\_\_  
7 \_\_\_\_\_  
8 \_\_\_\_\_

9 Were there any aspects of the study that you disliked?  
10  
11 \_\_\_\_\_  
12 \_\_\_\_\_  
13 \_\_\_\_\_

14 How did you find the 'reconstruction interview' experience?  
15  
16 \_\_\_\_\_  
17 \_\_\_\_\_  
18 \_\_\_\_\_

19 What motivated you to participate in the study?  
20  
21 \_\_\_\_\_  
22 \_\_\_\_\_  
23 \_\_\_\_\_  
24 \_\_\_\_\_

25 Do you have any other comments or suggestions?  
26  
27 \_\_\_\_\_  
28 \_\_\_\_\_  
29 \_\_\_\_\_  
30 \_\_\_\_\_  
31 \_\_\_\_\_  
32 \_\_\_\_\_  
33 \_\_\_\_\_  
34 \_\_\_\_\_  
35 \_\_\_\_\_  
36 \_\_\_\_\_  
37 \_\_\_\_\_  
38 \_\_\_\_\_  
39 \_\_\_\_\_  
40 \_\_\_\_\_  
41 \_\_\_\_\_  
42 \_\_\_\_\_

Centre for Health Informatics  
Australian Institute of Health Innovation  
Faculty of Medicine and Health Sciences  
MACQUARIE UNIVERSITY NSW 2109  
Phone: +61 (2) 9850 2436  
Email: annie.lau@mq.edu.au

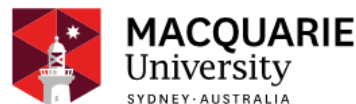

Chief Investigator's Name & Title: Dr Annie Lau

## Participant Information and Consent Form

### Name of Project

Analysis of patient work conducted by patients with type 2 diabetes and multiple comorbidities.

### Project Information

You are invited to participate in an observational study of the 'patient work' involved in self-managing type 2 diabetes and other conditions, using a combination of time-use diaries, a physical activity tracker, and a body camera.

The purpose of the study is to investigate the extra health-related work you undertake to accommodate your health conditions, such as taking medications, preparing meals, or making time to see doctors. We want to gain a better understanding of the daily routines of those living with type 2 diabetes and other health conditions, so that we can understand how to integrate healthcare interventions more seamlessly into our daily lives in order to improve health outcomes.

The study is being conducted by Dr Annie Lau (Ph 02 9850 2436 annie.lau@mq.edu.au), Dr Kathleen Yin (Ph 02 9850 2477 kathleen.yin@mq.edu.au), Prof Enrico Coiera (Ph 02 9850 2403), Dr Liliana Laranjo (Ph 02 9850 2426), A/Prof Kenneth Ho, Mr Wen Jun Liang (Bachelor of Engineering), Mr Joshua Hadrill (Bachelor of Engineering), Ms Isabelle Barnes (Bachelor of Clinical Science), Mr Joshua Jung (Bachelor of Clinical Science), Mr Christian Tran (Bachelor of Commerce and Arts), and Mr Jiawei he (Bachelor of Commerce and Arts) from Macquarie University's Australian Institute of Health Innovation, Dr Sanjyot Vagholkar from MQ Health General Practice, and Dr Teresa Harms and Prof Jonathan Gershuny from the University of Oxford (UK).

You will be given a \$60 shopping voucher as our appreciation for taking part in this study.

Participants are required to be consenting adults who:

- are able to speak, write and read in English;
- are aged 18 years and older;
- are diagnosed with type 2 diabetes and at least one more chronic health condition;
- are willing to fill in a Time-Use Diary for one day; and
- agree to wear the Edesix body camera on their person for one day.

If you decide to participate, you will be asked to complete three tasks:

- **Task 1 - Pre-study briefing session:** Attend a pre-study briefing session at Macquarie University, or a place of your choice (e.g. your home), where you will be given information about the study, asked to provide written consent if you are willing to participate, and complete two questionnaires about your personal information and your health (approximately 5-10 minutes each).

Afterwards, we will conduct an interview with you to better understand your health condition and existing patient work. This interview will be audio recorded for future analysis. You can terminate the interview at any point you want.

With your permission, we will take photos of your surroundings and the tools you use to manage your health (e.g. medications, devices, home environment).

Lastly, we will provide you with two pieces of equipment (Edesix camera and time-use diary), and show you how to use them for the second task of data collection. We will also provide you an explanation card where you can show it to members of the public who are enquiring about the study.

- **Task 2 - Data collection:** After the briefing session, you will be asked to wear the Edesix body camera during the waking hours of one (1) day, which will take video recordings of your daily activities for approximately 8 to 14 hours. No audio will be recorded.

We will also ask you to complete the time-use diary over the same day for 24 hours.

You have the right to remove the camera at any time.

(Please note: The Edesix body camera is encrypted to ensure your data is protected.

You are recommended to turn off the body camera during situations when anyone (including yourself) is dressing or undressing, using the bathroom or showers, or during any situations where privacy or recording is of concern.

Should you feel unsafe due to the presence of the body camera at any stage of the study, you should always prioritise your own personal safety and comfort above the study's requirements.)

- 1
- 2
- 3
- 4
- 5
- 6
- **Task 3 - Post-study debriefing session:** Immediately after the data collection day, we will ask you to attend a 1-hour post-study session at Macquarie University, or a place of your choice, where we will go through the videos together and conduct a debriefing session with you.

7

8

9

Please bring the two pieces of equipment with you on the day (Edesix camera and Time-Use Diary).

10

11

12

13

The video footage will be converted to images, and you will first view the images alone. You have the right to delete any (or all) of the images before the interview.

14

15

16

17

18

19

An interview (about 30-40 minute in length) will be conducted where the research team will ask you to describe your day, with assistance from the images. This interview will be audio recorded for future analysis, and you can terminate it at any point you want.

20

21

22

23

You will be asked to answer one (1) paper-based questionnaire about your experience during the study day (~10 minutes to answer).

24

25

### Your confidentiality

26

27

28

29

Any information or personal details gathered in the course of the study are confidential, except as required by law. No individual will be identified in any publication or presentation of the results.

30

31

32

33

34

35

Only members of the research team will have access of the data. None of your video or photo images will be released to the public. In cases when we need to use video or photo images in publications or presentations, we will seek your permission first, and images will be blurred such that no one is identifiable.

36

37

38

39

The study data will be kept for a minimum of 5 years from the most recent publication date and will be safely stored on a password-protected computer locked in the study centre.

40

41

42

43

44

45

46

By signing this form, you are also consenting to the potential use of this data in future research, however the Macquarie University Human Research Ethics Committee must first approve any such future research before any of your data is used. The results of the study will be published in peer-reviewed journals and may be presented at scientific conferences.

47

48

49

50

51

Participation in this study is entirely voluntary: you are not obliged to participate and if you decide to participate, you are free to withdraw at any time without having to give a reason and without consequence.

52

53

54

55

Your participation in this study will not affect your relationship with Macquarie University, nor the clinical care you receive at the MQ Health General Practice Unit.

**INVESTIGATOR/PARTICIPANT'S COPY**

I, \_\_\_\_\_ have read (*or, where appropriate, have had read to me*) and understand the information above and any questions I have asked were answered to my satisfaction. I agree to participate in this research, knowing that I can withdraw from further participation in the research at any time without consequence. I have been given a copy of this form to keep.

I **consent / do not consent** (*circle one*) for the research team to use my de-identified photos and video images in publications and presentations, provided that the persons in the images cannot be identified.

Participant's Name: \_\_\_\_\_  
(Block letters)

Participant's Signature: \_\_\_\_\_ Date: \_\_\_\_\_

Investigator's Name: \_\_\_\_\_  
(Block letters)

Investigator's Signature: \_\_\_\_\_ Date: \_\_\_\_\_

The ethical aspects of this study have been approved by the Macquarie University Human Research Ethics Committee. If you have any complaints or reservations about any ethical aspect of your participation in this research, you may contact the Committee through the Director, Research Ethics & Integrity (telephone (02) 9850 7854; email [ethics@mq.edu.au](mailto:ethics@mq.edu.au)). Any complaint you make will be treated in confidence and investigated, and you will be informed of the outcome.

## Pre-study interview questions

The pre-study interview will be conducted in the following steps:

1. The research team will explain the study to the participant.
2. The participant will read and sign the consent form.
3. The participant will be asked to complete a basic demographic survey (approximately 5 minutes).
4. The participant will be asked to complete the Multimorbidity Illness Perceptions Scale (approximately 10 minutes).
5. A semi-structured interview (approximately an hour) will be conducted with the participant regarding the health-related tasks they are engaged in. The interview will be audio recorded to allow for analysis.
6. With the participant's permission, the research team will take photographs of the participant's current medications, medical devices, and their surroundings.
7. The participant will be instructed to the use of the Edesix body camera and the Time-Use Diary.
8. The participant will also receive an instruction card to explain what the study is about if members of the public enquire about it.

### Life History

Examples:

- How was your health as a child or a young person?
- How was the health of your family?
- How have your health conditions affected your job?

### Social Life & Mental Health

Examples:

- Has your health ever affected your interactions with your friends?
- How do you feel about the impact (or lack of) your health had on your social life?
- Can you tell me a bit about your mental journey when you were diagnosed / started on this treatment?
- Do you feel differently towards your health conditions and meds now than you did before?

### Physical Health & Medical History

Examples:

- What health conditions do you have?
- What medications do you take? And how often?
- Do you know much about your health conditions?
- Did you go research on your medications/conditions yourself?
- What kind of food do you have to watch out for due to your health?
- With your level of mobility, how do you find exercise?



1  
2  
3 Physical Environment  
4

5 Examples:

- 6
- 7 • How do you find going up and down the stairs?
  - 8 • Who does your cooking/laundry/gardening?
- 9

10  
11 Organisational efforts & Attitude  
12

13 Examples:

- 14
- 15 • Do you have domestic help? Paid or unpaid?
  - 16 • Has the physical layout of your house / any other place affected your ability to take care of
  - 17 yourself?
  - 18 • What are your opinions about your medications and your doctors?
- 19  
20  
21  
22  
23  
24  
25  
26  
27  
28  
29  
30  
31  
32  
33  
34  
35  
36  
37  
38  
39  
40  
41  
42  
43  
44  
45  
46  
47  
48  
49  
50  
51  
52  
53  
54  
55  
56  
57  
58  
59  
60

## Post-study interview questions

The post-study interview will be conducted in the following steps:

1. The participant will return the Edesix body camera and Time-Use Diary.
2. Data from the body camera will be downloaded to a secure computer.
3. The video from the body camera will be converted into screenshots, with one screenshot taken for every 10 seconds of video footage.
4. After video download and screenshot conversion, the videos will be deleted, and the participant will view the screenshots alone, and has the right to delete any or all the images.
5. The research team will conduct a 30 – 40 minutes interview with the participant, where he/she will describe the study day, with the assistance of the images and the Time-Use Diary, focusing on any specific health-related activities (e.g. Cooking, exercising, social activities).
6. The interview will be audio recorded to allow for thematic analysis.
7. The researchers may also ask participants to clarify the activity in any screenshots that may appear ambiguous (e.g. ceiling images may imply napping on the sofa).
8. The researchers will also check that the time-stamp on the screenshots match the activities reported in the Time-Use Diary (if not, annotate the Time-Use Diary or ask participant questions for clarification).
9. The participants will complete the Participant Experience Survey, and give feedback regarding the study.
10. The participant will be remunerated with a \$60 Westfield shopping voucher for their assistance.

Questions for the semi-structured interview:

Examples

- Tell us about your day.
- Was this a typical day? If not, what was different on this day?
- What time did you start / stop filling in the Time-Use Diary?
- What time did you start / stop video recording?
- Around what time did you wake up and go to bed last night?
- How did you sleep during the study night?
- Do you always do [activity] at this time of the day?
- Is this the kinds of food you usually eat for breakfast/lunch/dinner?
- You spent a long time doing [activity] yesterday. Is this how long you usually take to do [activity]?
- Do you always do [activity] at [location]?
- Are there changes you would like to make to your daily routine?

# BMJ Open

## Patient Work from a Context and Time Use Perspective – A Mixed-Methods Study Protocol

|                                 |                                                                                                                                                                                                                                                                                                                                                                                                                                                                                                                                                                                                                                                                                                                                                                                                                                                                                                                                                                              |
|---------------------------------|------------------------------------------------------------------------------------------------------------------------------------------------------------------------------------------------------------------------------------------------------------------------------------------------------------------------------------------------------------------------------------------------------------------------------------------------------------------------------------------------------------------------------------------------------------------------------------------------------------------------------------------------------------------------------------------------------------------------------------------------------------------------------------------------------------------------------------------------------------------------------------------------------------------------------------------------------------------------------|
| Journal:                        | <i>BMJ Open</i>                                                                                                                                                                                                                                                                                                                                                                                                                                                                                                                                                                                                                                                                                                                                                                                                                                                                                                                                                              |
| Manuscript ID                   | bmjopen-2018-022163.R2                                                                                                                                                                                                                                                                                                                                                                                                                                                                                                                                                                                                                                                                                                                                                                                                                                                                                                                                                       |
| Article Type:                   | Protocol                                                                                                                                                                                                                                                                                                                                                                                                                                                                                                                                                                                                                                                                                                                                                                                                                                                                                                                                                                     |
| Date Submitted by the Author:   | 25-Oct-2018                                                                                                                                                                                                                                                                                                                                                                                                                                                                                                                                                                                                                                                                                                                                                                                                                                                                                                                                                                  |
| Complete List of Authors:       | Yin, Kathleen; Macquarie University, Australian Institute of Health Innovation<br>Harms, Teresa; University of Oxford Social Sciences Division, Centre for Time Use Research; University of Western Australia Business School<br>Ho, Kenneth; Macquarie University, Faculty of Medical and Health Sciences<br>Rapport, Frances ; Macquarie University, Australian Institute of Health Innovation<br>Vagholkar, Sanjyot; Macquarie University, Faculty of Medical and Health Sciences<br>Laranjo, Liliana ; Australian Institute of Health Innovation, Centre for Health Informatics<br>Coiera, Enrico; Macquarie University, 5. Centre for Health Informatics, Australian Institute of Health Innovation, Faculty of Medicine and Health Sciences<br>Gershuny, Jonathan; University of Oxford Social Sciences Division, Centre for Time Use Research<br>Lau, Annie; Macquarie University, Australian Institute of Health Innovation, Faculty of Medicine and Health Sciences |
| <b>Primary Subject Heading</b>: | Health informatics                                                                                                                                                                                                                                                                                                                                                                                                                                                                                                                                                                                                                                                                                                                                                                                                                                                                                                                                                           |
| Secondary Subject Heading:      | Patient-centred medicine, Research methods, Qualitative research                                                                                                                                                                                                                                                                                                                                                                                                                                                                                                                                                                                                                                                                                                                                                                                                                                                                                                             |
| Keywords:                       | Patient work, Mixed-methods study, Body-worn cameras, Time-use diary, Passive data collection, Burden of disease                                                                                                                                                                                                                                                                                                                                                                                                                                                                                                                                                                                                                                                                                                                                                                                                                                                             |
|                                 |                                                                                                                                                                                                                                                                                                                                                                                                                                                                                                                                                                                                                                                                                                                                                                                                                                                                                                                                                                              |

SCHOLARONE™  
Manuscripts

1  
2  
3 **1 Patient Work from a Context and Time Use Perspective – A Mixed-Methods Study**

4  
5 **2 Protocol**

6  
7  
8 3 Kathleen Yin<sup>1</sup>, Teresa Harms<sup>2,3</sup>, Kenneth Ho<sup>4</sup>, Frances Rapport<sup>1</sup>, Sanjyot Vagholkar<sup>4</sup>, Liliana

9  
10 4 Laranjo<sup>1</sup>, Enrico Coiera<sup>1</sup>, Jonathan Gershuny<sup>2</sup>, Annie Y. S. Lau<sup>1</sup>

11  
12  
13  
14  
15 6 Corresponding author:

16  
17 7 Kathleen Yin

18  
19 8 Australian Institute of Health Innovation

20  
21 9 Macquarie University, 75 Talavera Rd, North Ryde NSW 2113

22  
23  
24 10 Email: [kathleen.yin@mq.edu.au](mailto:kathleen.yin@mq.edu.au)

25  
26 11 Telephone: +61 2 9850 2477

27  
28  
29  
30  
31 13 1. Centre for Health Informatics, Australian Institute of Health Innovation, Macquarie  
32  
33 14 University, Sydney, Australia.

34  
35 15 2. Centre for Time Use Research, Department of Sociology, University of Oxford, Oxford,  
36  
37 16 Oxfordshire, United Kingdom.

38  
39  
40 17 3. Planning and Transport Research Centre, Business School, University of Western  
41  
42 18 Australia, Perth, Australia.

43  
44  
45 19 4. Faculty of Medical and Health Sciences, Macquarie University, Sydney, Australia.

46  
47  
48  
49 21 Word count: 3951

1  
2  
3 **1 Abstract:**  
4

5 **2 Introduction:** Self-management is widely promoted but less attention is focused on the work  
6  
7 required from patients. To date, many individuals struggle to practise self-management.  
8  
9 ‘Patient work’, a concept that examines the ‘work’ involved in self-management, is an  
10  
11 approach to understanding the tasks, effort, time, and context from patient perspective. The  
12  
13 purpose of our study is to use a novel approach combining non-obstructive observations via  
14  
15 digital devices with in-depth qualitative data about health behaviours and motivations, to  
16  
17 capture the full range of patient work experienced by people with type 2 diabetes and chronic  
18  
19 co-morbidities. It aims to yield comprehensive insights about “what works” in self-  
20  
21 management, potentially extending to populations with other chronic health conditions.  
22  
23

24  
25 **11 Methods and analysis:** This mixed-methods observational study involves a i) pre-study  
26  
27 interview and questionnaires, ii) a 24-hour period during which participants wear a camera  
28  
29 and complete a time-use diary, and a iii) post-study interview and study feedback. Adult  
30  
31 participants living with type 2 diabetes with at least one chronic co-morbidity will be  
32  
33 recruited using purposive sampling to obtain a balanced gender ratio and of participants using  
34  
35 insulin and those using only oral medication. Interviews will be analysed using thematic  
36  
37 analysis. Data captured by digital devices, diaries and questionnaires will be used to analyse  
38  
39 the duration, time, context, and patterns of health-related behaviours.  
40  
41  
42  
43

44  
45 **19 Ethics and dissemination:** The study was approved by the Macquarie University Human  
46  
47 Research Ethics Committee for Medical Sciences (Reference Number 5201700718).  
48  
49 Participants will carry a wallet-sized card that explains the purpose of the study to third  
50  
51 parties, and can remove the camera at any stage. Before the post-study interview begins,  
52  
53 participants will view the camera images in private and can delete any images. Should any  
54  
55 images be used in future publications or presentations, identifying features such as human  
56  
57 faces and names will be obscured.  
58  
59  
60

1  
2  
3 1  
4  
5 2  
6  
7  
8 3  
9  
10 4  
11  
12 5  
13  
14  
15 6  
16  
17 7  
18  
19 8  
20  
21 9  
22  
23 10  
24  
25 11  
26  
27 12  
28  
29 13  
30  
31  
32  
33 14  
34  
35  
36 15  
37  
38 16  
39  
40 17  
41  
42 18  
43  
44  
45 19  
46  
47 20  
48  
49 21  
50  
51 22  
52  
53  
54 23  
55  
56 24  
57  
58 25  
59  
60

## Strengths and limitations of this study

- This is the first study that employs a mixed-method design using passive digital observation equipment, self-report time-use diaries, complemented with interviews and questionnaires, to document patient work.
- Using the body-worn camera may diminish the observer effect caused by having researchers observe participants in a private setting, as well as reducing the participant burden of having researchers in their homes for prolonged periods of time.
- The self-report diary complements data from the passive device by creating a holistic view of patient work carried out by the participant.
- The study is limited by the 24-hour data collection period, which may not include patient work that occurs frequently, but outside the observation period.

## Keywords

Patient work; Mixed-method study; Body-worn cameras; Time-use diary; Passive data collection devices; Interviews; Burden of disease; Chronic disease; Type 2 diabetes; Chronic co-morbidity; Self-management; Patient experience; Patient; Consumer.

## 1 INTRODUCTION

2 Self-management is widely promoted but less attention is focused on the work required from  
3 patients. It is a constant commitment of learning new skills, breaking old habits, and  
4 managing different emotions over the length of the illness.[1] Patients and their families often  
5 need to adjust their daily routines to accommodate for their health condition, such as making  
6 time to administer medications, visit medical professionals, or prepare special meals.[2-5]  
7 Yet, many individuals struggle to practise self-management effectively, especially for those  
8 with long-term chronic conditions.[6-8]

9  
10 Past studies reported on the barriers and challenges to self-management, focusing on patients  
11 with multiple chronic conditions,[6, 7] the difficulty involved in self-management,[8] time  
12 invested,[9] competing priorities,[10, 11] support sources required,[12] and how self-  
13 management differs between the patients' and healthcare professionals' perspectives.[13]  
14 Yet, few studies reported on the actual 'work', or the tasks involved, from the patient, as well  
15 as whether self-management fits within the patient's context.

16  
17 When self-management is poorly integrated into people's lives, the work required has the  
18 potential to generate additional stress, contributing to non-compliance and negatively  
19 impacting on patient health outcomes.[14, 15] Unfortunately, many health interventions are  
20 currently implemented without considering the *work* involved from patient perspective or the  
21 *context* of a patient's life. Treatment and self-management recommendations, whilst given  
22 with good will, often fail to acknowledge the specificities of a patient's daily routine,  
23 physical environment, social obligations, as well as internal beliefs and attitudes.[16-19] In  
24 parallel, digital health interventions hold the promise to improve self-management. However,  
25 numerous studies evaluating digital self-management interventions showed a high participant

1 dropout rate, with some studies having retention rates of 1% by the end of the study  
2 period.[16, 19-21] Specifically, participants reported the devices' lack of 'fit' into their daily  
3 lives as reasons for discontinuation.[22]

4  
5 Understanding whether there is a dissonance between patients' existing routines and the work  
6 involved in self-management is important to overcome barriers and challenges. The concept  
7 of 'patient work', derived from health ergonomics, describes the tasks (physical and  
8 cognitive) conducted by patients to manage their health, as well as the holistic sum of  
9 contexts (physical, social, mental, and organisational) that influence the work conducted.[23-  
10 25] It is an approach to understanding the actions people take (or not take) in self-  
11 management. While self-management focuses on the strategies people employ, patient work  
12 breaks down these strategies into day-to-day tasks and examines how the effort and time  
13 involved, as well as the contextual and ergonomic factors, affect the way self-management is  
14 practised and why some tasks are carried out while others are neglected.

15  
16 The purpose of this study is to examine the *patient work* involved in living with multiple  
17 chronic conditions, focusing on the daily lives of people with type 2 diabetes and chronic co-  
18 morbidities.

## 19 20 **Patient work research**

21 Previous patient work research had focused on patients living with cardiovascular diseases  
22 such as heart failure and stroke.[24-26] However, no studies have focused specifically on  
23 people living with more than one chronic condition.

24



1  
2  
3 1 In addition, previous patient work approaches relied heavily on self-report methods  
4  
5 2 (interviews[27, 28]), direct observation (researchers being present continuously in  
6  
7 3 participants' homes), or theoretical modelling (analysing macro-ergonomic elements[29,  
8  
9 4 30]). These data collection methods are limited by the level of reliability in self-report data  
10  
11 5 (e.g. social desirability effect) and the degree of discomfort participants experience during  
12  
13 6 direct observation.  
14  
15  
16  
17  
18

19 8 The need for direct observation by researchers also meant the duration of visits had to be  
20  
21 9 limited, ranging from 30 minutes to 1 hour at a time,[30] making these short periods unlikely  
22  
23 10 to capture the 'natural' routines of participants as there is high likelihood they could be  
24  
25 11 affected by the observer effect.[31] To our knowledge, no studies have utilised digital devices  
26  
27 12 that automatically and non-obstructively collect data on patient work over a longer  
28  
29 13 timeframe.  
30  
31  
32  
33  
34

### 35 15 **Type 2 Diabetes and Other Co-morbidities**

36  
37 16 The nature of type 2 diabetes, which impacts the entire metabolic process, means that patients  
38  
39 17 need to carry out a variety of different activities. These may include diet modification,[32]  
40  
41 18 weight management,[33] exercise,[34] complication prevention,[35] blood glucose tests,[36]  
42  
43 19 and insulin injections.[26]  
44  
45  
46  
47  
48

49 21 Metabolically-related co-morbidities such as hyperlipidaemia, cardiovascular diseases, and  
50  
51 22 renal disorders[37, 38] are frequently present in people living with type 2 diabetes,  
52  
53 23 warranting the inclusion of co-morbidities to reflect the true extent of patient work. Co-  
54  
55 24 morbidity is also frequently a criterion for exclusion in research studies, suggesting this study  
56  
57  
58  
59  
60

1  
2  
3 1 could give rare insights into the lives of people living with type 2 diabetes, as well as a  
4  
5 2 greater understanding of self-management in patients with chronic co-morbid conditions.  
6  
7  
8 3  
9

#### 10 4 **AIMS**

11  
12 5 This study will investigate the patient work conducted by people living with type 2 diabetes  
13  
14 6 and at least one chronic co-morbidity. It will address three gaps identified in the literature:  
15  
16 7 the few studies reporting the ‘work’ involved in self-management from patient perspective  
17  
18 8 (patient work), the methodological gap in using digital devices to collect data non-  
19  
20 9 obstructively on self-management activities and contexts over a longer time frame (24-hour  
21  
22 10 period), and focusing on people with complex challenges to self-management (those with  
23  
24 11 multiple chronic conditions).  
25  
26  
27  
28  
29  
30

#### 31 13 **METHODS**

32  
33 14 This is a mixed-methods, observational study that involves three stages: i) pre-study  
34  
35 15 interview and questionnaires, ii) a 24-hour period during which participants wear a camera  
36  
37 16 and complete a time-use diary, and a iii) post-study session with interview and study  
38  
39 17 feedback. The project is approved by the Macquarie University Human Research Ethics  
40  
41 18 Committee (approval 5201700718). Our study adapted the protocols used and validated by  
42  
43 19 Kelly et al.,[39, 40] which were employed in research projects conducted by the Centre for  
44  
45 20 Time Use Research (CTUR) and the British Heart Foundation Centre on Population  
46  
47 21 Approaches for Non-Communicable Disease Prevention, both at The University of Oxford.  
48  
49  
50

#### 51 22 52 53 23 **Sample and recruitment**

54  
55 24 Eligible participants are: (1) aged 18 years and older; (2) consenting adults who can speak,  
56  
57 25 write and read in English; (3) have been diagnosed with type 2 diabetes and at least one  
58  
59  
60

1 chronic co-morbidity; (4) willing to complete a time-use diary for one day; and (5) agree to  
2 wear the body-worn camera for one day. Exclusion criteria include those who are currently  
3 experiencing: (1) pregnancy; (2) critical illness; (3) end-stage disease; (4) dementia; (5)  
4 severe mental disorders that prevent one from giving informed consent and; (6) dependent on  
5 others for basic activities of daily living such as dressing and eating. Participants will receive  
6 \$60 in Australian Dollars of shopping vouchers as remuneration.

7  
8 To capture patients at various stages of diabetes, forty (40) participants will be recruited, with  
9 balanced gender ratio, and balanced numbers of participants using only oral medication and  
10 those using insulin. The number of participants chosen was informed by previous qualitative  
11 studies in patient work.[27, 28] This sample size offers the power to achieve rich and  
12 nuanced data, while acknowledging the different time intervals between data points for each  
13 data capture tool.[24, 27, 28] Previous patient work studies analysed 60-80 hours of  
14 interviews or direct observations per study.[27, 28] This study will capture approximately 2  
15 hours of interview data and approximately 5000 images per participant. Therefore, a sample  
16 size of 40 participants is comparable to the depth of data captured by previous studies.

17  
18 Recruitment will be carried out via Macquarie University general practice and general  
19 practitioners and endocrinologists in the surrounding suburbs. These medical practitioners  
20 manage a large and diverse patient base across northern Sydney and cover a wide range of  
21 culturally and economically diverse population groups.

22  
23 Promotional flyers will be distributed to the participating medical practices and includes  
24 general study information and a link to the study website, where potential participants can  
25 check the eligibility criteria ([www.tinyurl.com/patientswork](http://www.tinyurl.com/patientswork)). The study will also be

1 promoted on the Macquarie University Facebook page and via an emailed newsletter  
2 associated with the University. Healthcare practitioners will not be notified if their patients  
3 agreed to participate in the study to reduce the possibility of coercion.

4  
5 Databases of medical practices involved in recruitment will be searched to identify eligible  
6 patients for the study. Only personnel employed by the medical practices will conduct these  
7 searches. Participating healthcare practitioners will also send invitation letters to eligible  
8 patients, with a pre-paid reply slip included. Patients interested in participating will be asked  
9 to return the reply slip with their contact details, so a member of the research team can  
10 contact them.

11  
12 Telephone calls will also made to eligible patients to inform them about the study. If during  
13 the initial phone call the potential participant agrees to consider participating, the researcher  
14 will send a detailed email to the participant with a digital version of the information pamphlet  
15 as well as a link to the study website. The potential participant then either agrees to  
16 participate or declines. If the potential participant agrees to participate, the researcher will  
17 arrange a suitable time for interviews to occur. All participants will provide written informed  
18 consent before data collection commences.

19  
20 Initial contact for all participants will be a telephone call conducted by the research team, to  
21 check whether the participant fits the eligibility criteria, assure confidentiality and anonymity  
22 during data-collection, and address any questions. This approach will minimise participant  
23 contact with the research team and clinicians. While self-nominated participants may be  
24 subject to participation bias, high completion rates and compliance are likely.

25

## 1 **Patient and Public Involvement**

2 The concept study was conceived during a 1-day Consumer Symposium conducted at  
3 Macquarie University, where 10 health consumers gave feedback and critique regarding  
4 health research.

5  
6 Health Consumers New South Wales, a patient advocacy group, was then consulted  
7 regarding consumer engagement and advice was given to the researchers regarding consumer  
8 involvement during study conception, recruitment, analysis to dissemination.

9  
10 A pilot trial of the protocols with the equipment was conducted with two patients. Summaries  
11 of the findings were presented to the participants.

12  
13 During study conception, the researchers also engaged with Healthdirect, a national  
14 organization providing digital health information for health consumers, and the Northern  
15 Sydney Primary Health network and local GP network, which has a consumer council.

16  
17 Results will be disseminated to these bodies, which will have broader implications to policies  
18 directed to consumers. Publications arising from the study will also be forwarded to each  
19 participant via emails.

## 20 21 **Data collection instruments and equipment**

22 The study will be carried out in three stages as described in Figure 1 and Table 1. Utilising  
23 multiple types of data, the study generates a holistic report of patient work conducted by  
24 people living with type 2 diabetes and chronic co-morbidities in terms of observed physical

1 work, organisational efforts, burden of disease, and attitudes and beliefs underlying health  
2 behaviours.

3  
4 The 24-hour data collection is more likely to capture a more representative day compared to  
5 previous patient work studies, which only captures patient activities for a few hours at most.  
6 While it will be hard to find a day that is truly representative of one's life, the researchers ask  
7 the participants to nominate a day for the study that the participants themselves consider to be  
8 'normal'.

9  
10 Table 1. Data collected at different stages during the study

| Pre-study                                                                                                                                                                                                                                    | Data collection (24-hour)                                                                                   | Post-study                                                                                                                                                                 |
|----------------------------------------------------------------------------------------------------------------------------------------------------------------------------------------------------------------------------------------------|-------------------------------------------------------------------------------------------------------------|----------------------------------------------------------------------------------------------------------------------------------------------------------------------------|
| <ul style="list-style-type: none"> <li>• Interview (1-hour)</li> <li>• Participant demographics questionnaire</li> <li>• Multimorbidity Illness Perceptions Scale[41]</li> <li>• Photos of participant's home (where appropriate)</li> </ul> | <ul style="list-style-type: none"> <li>• Body-worn camera</li> <li>• Time-use diary (Appendix 1)</li> </ul> | <ul style="list-style-type: none"> <li>• Reconstruction interview (30-40 minutes)</li> <li>• Participant experience questionnaire</li> <li>• Researcher's notes</li> </ul> |

11  
12 The following instruments and equipment will be used for data collection.

- 13 • Time-use diary - The self-report time-use diary is a validated tool[39] and the version  
14 used in this study is the Harmonised European Time Use Diary[42] (UK version). For  
15 details of the time-use diary, please see Appendix 2. This method of using free-text  
16 time-use diaries to self-report activities has high statistical validity and good  
17 acceptance rates with volunteer participants (ranging from 56% to 100%[39, 43]).
- 18 • Photos – With permission from the participant, photos of their medications, medical  
19 devices, and home surroundings will be taken to inform about the participant's  
20 physical environment. Should the participant reside in an environment that can affect

1  
2  
3 1 their healthcare (e.g. a house with stairs and a risk for falls), these issues will be taken  
4  
5 2 into consideration. Participants will be alerted should an immediate and significant  
6  
7 3 risk be identified.

- 4 • Body-worn camera – The body-worn camera (Edesix VB-300, Edinburgh) will  
5 automatically record silent continuous video footage. It can be attached to clothing  
6 and/or worn on a lanyard. Previous studies with body-worn cameras showed high  
7 degrees of acceptability, with acceptance rates ranging from 70% to 100%[39, 43,  
8 44], especially when participants are reassured they can remove the camera if they  
9 feel the recording may intrude upon their privacy[39, 43].
- 10 • Demographic questionnaire – The demographic questionnaire (Appendix 3) will be  
11 administered during the pre-study session and takes about 10 minutes to complete.
- 12 • The Multimorbidity Illness Perceptions Scale – The Multimorbidity Illness  
13 Perceptions Scale [41] (Appendix 4) is validated statistically and was developed to  
14 capture the perception of patients with co-morbidities about their health.[41] Illness  
15 perception is known to affect and predict health-related behaviour, to the extent that  
16 patients who perceive their diseases as more controllable are more likely to engage in  
17 adaptive strategies[45], thus directly affecting the patient work they engage in. The  
18 Scale will be administered during the pre-study session and takes approximately 5  
19 minutes to complete.
- 20 • Participant experience questionnaire – A participant experience questionnaire  
21 (Appendix 5) will be administered during the post-study session. This is estimated to  
22 take approximately 10 minutes.
- 23 • Researcher notes: a summary of each participant will be written up within a week  
24 after the post-study session, summarising the researcher's observations of the

1  
2  
3 1 participant, home context, and any feedback from the participant at different stages of  
4  
5 2 the study.  
6  
7  
8 3  
9

#### 10 4 **Stage 1: Pre-study session**

11  
12 5 Prior to the pre-study session, participants will be provided with the Participant Information  
13  
14 6 Booklet (Appendix 1) and will sign a written informed consent form (Appendix 6) before  
15  
16  
17 7 data is collected. Participants have the right to decline at this stage and to retract consent at  
18  
19 8 any time throughout the study.  
20  
21  
22 9

23  
24 10 Ideally, the pre-study interview will occur in the participant's home for researchers to note  
25  
26 11 ergonomic factors. To ensure researcher safety, two researchers will make the home visits.  
27  
28 12 Participants may come to Macquarie University for the interview if they prefer.  
29  
30  
31 13

32  
33 14 Following consent and before the pre-study interview, participants will also be asked to  
34  
35 15 complete the demographic questionnaire (Appendix 3) and the Multimorbidity Illness  
36  
37 16 Perceptions Scale[41] (Appendix 4).  
38  
39  
40 17

#### 41 42 18 *Pre-study interview*

43  
44 19 After the completion of the questionnaires, a semi-structured interview will be conducted to  
45  
46 20 gain information about the participant's life history, medical history, and existing factors that  
47  
48 21 impact patient work. Participants will be invited to talk about their health and lifestyle, with  
49  
50 22 areas of focus separated into life history, social life and mental health, physical health and  
51  
52 23 medical history, physical environment, and organisational effort and attitude (Appendix 7).  
53  
54  
55 24 With the participant's permission, the interview will be audio-recorded to assist with data  
56  
57  
58  
59  
60



1  
2  
3 1 coding and thematic analysis (e.g. daily activities, rationales behind behaviours, and factors  
4  
5 2 that influence why participants behave in certain manners).  
6  
7  
8 3

9  
10 4 Lastly, participant will be provided with a body-worn camera and the Harmonised European  
11  
12 5 Time Use Surveys UK Time-Use Diary (Appendix 2),[42] together with relevant instructions.  
13  
14 6 Photographs of the participant's medications, medical devices and home environment will  
15  
16 7 also be taken at this stage.  
17  
18  
19 8

### 20 21 9 **Stage 2: Participant self-recording data collection**

22  
23  
24 10 During the 24-hour study period, participants will be asked to wear the camera around their  
25  
26 11 neck on a lanyard during waking hours (12-16 hours). The time-use diary will be completed  
27  
28 12 by the participant over the course of the same day for 24 hours. Participants will be given  
29  
30 13 instructions (Figure 2) to re-charge the camera overnight or if the battery becomes low.  
31  
32  
33 14

### 34 35 15 **Stage 3: Post-study session**

36  
37 16 A post-study session will occur immediately after the 24-hour study period has concluded.  
38  
39 17 The camera footage will be downloaded and converted into images using software developed  
40  
41 18 in-house, with one screenshot taken for every 10 seconds of footage. The participants will be  
42  
43 19 able to view all the images alone before the research team views them, allowing the  
44  
45 20 participant to delete any or all unwanted images.  
46  
47  
48  
49 21

### 50 51 22 *Post-study 'reconstruction' interview*

52  
53  
54 23 The participant will be interviewed for approximately 30 – 40 minutes after data collection  
55  
56 24 (Appendix 8). Participants will be asked to describe the study day, using the screenshots and  
57  
58  
59  
60

1  
2  
3 1 time-use diary as prompts, with a focus on health-related tasks. The interview will be audio  
4  
5 2 recorded with the participant's permission to allow for thematic analysis of transcripts.  
6  
7  
8 3

9  
10 4 During the second interview, the researchers will also ask the participant whether the study  
11  
12 5 day was 'normal' for them, and whether anything special occurred.  
13  
14  
15 6

16  
17 7 After the interview, the participant will be asked to complete the Participant Experience  
18  
19 8 Questionnaire (Appendix 5) and provide feedback on the methodology.  
20  
21  
22 9

## 23 24 10 **DATA ANALYSIS**

25  
26 11 Both qualitative and quantitative data will be gathered and analysed. The varied data sources  
27  
28 12 are complementary and focus on different aspects of patient work. For example, self-reported  
29  
30 13 data regarding daily tasks via the time-use diary can be enriched through an examination of  
31  
32 14 the screenshots from the camera.  
33  
34  
35 15

### 36 37 16 **Quantitative data analysis**

38  
39  
40 17 Video recordings from the body-worn camera will be automatically converted into series of  
41  
42 18 10-second screenshots, which are then processed for analysis of daily activities (e.g. eating,  
43  
44 19 sleeping). These screenshots will be tagged using the TensorFlow[46] and/or Clarifai™ (New  
45  
46 20 York, USA) Application Programming Interface, which automatically generate tags that  
47  
48 21 identify objects and describe content within the image (e.g. a lady and a car). A subset of  
49  
50 22 these tags will be manually verified for accuracy.  
51  
52  
53 23

54  
55  
56 24 Time-use diary data will be analysed in conjunction with camera screenshots. Participants'  
57  
58 25 activities reported in the time-use diary and observed via screenshots will be coded using an  
59  
60

1 adapted version of the Harmonised European Time Use Surveys activity frame[47], and  
2  
3  
4  
5  
6  
7  
8  
9  
10  
11  
12  
13  
14  
15  
16  
17  
18  
19  
20  
21  
22  
23  
24  
25  
26  
27  
28  
29  
30  
31  
32  
33  
34  
35  
36  
37  
38  
39  
40  
41  
42  
43  
44  
45  
46  
47  
48  
49  
50  
51  
52  
53  
54  
55  
56  
57  
58  
59  
60

1 adapted version of the Harmonised European Time Use Surveys activity frame[47], and  
2 assessed for the duration, frequency, timing and patterns.  
3  
4  
5  
6  
7  
8  
9  
10  
11  
12  
13  
14  
15  
16  
17  
18  
19  
20  
21  
22  
23  
24  
25  
26  
27  
28  
29  
30  
31  
32  
33  
34  
35  
36  
37  
38  
39  
40  
41  
42  
43  
44  
45  
46  
47  
48  
49  
50  
51  
52  
53  
54  
55  
56  
57  
58  
59  
60

4 Questionnaire data (participant demographics, study feedback, and the Multimorbidity Illness  
5 Perceptions Scale) will be reported using descriptive and inferential statistics. All statistical  
6 analyses will be conducted using SPSS® (IBM, New York, USA).  
7  
8  
9  
10  
11  
12  
13  
14  
15  
16  
17  
18  
19  
20  
21  
22  
23  
24  
25  
26  
27  
28  
29  
30  
31  
32  
33  
34  
35  
36  
37  
38  
39  
40  
41  
42  
43  
44  
45  
46  
47  
48  
49  
50  
51  
52  
53  
54  
55  
56  
57  
58  
59  
60

### 8 **Qualitative Data Analysis**

9 Both pre-study and post-study interviews will be transcribed verbatim. Analysis of the  
10 interview transcripts will be conducted using the NVivo® thematic analysis software package  
11 (NVivo, Melbourne, Australia).[48] Two members of the research team will independently  
12 code the transcripts in a systematic manner. Any coding discrepancies between the two will  
13 be resolved through reaching a consensus.  
14  
15  
16  
17  
18  
19  
20  
21  
22  
23  
24  
25  
26  
27  
28  
29  
30  
31  
32  
33  
34  
35  
36  
37  
38  
39  
40  
41  
42  
43  
44  
45  
46  
47  
48  
49  
50  
51  
52  
53  
54  
55  
56  
57  
58  
59  
60

15 Photographs of the participant's medications, medical devices, and home environment and  
16 camera screenshots will provide context to the interview. The photographs will also be used  
17 to give contextual feedback regarding the participant's daily activities, as revealed in the  
18 video recordings and time-use diaries. Notes taken by researchers after the post-study  
19 interview for each participant will be used to help with photo and qualitative data analysis.  
20  
21  
22  
23  
24  
25  
26  
27  
28  
29  
30  
31  
32  
33  
34  
35  
36  
37  
38  
39  
40  
41  
42  
43  
44  
45  
46  
47  
48  
49  
50  
51  
52  
53  
54  
55  
56  
57  
58  
59  
60

### 21 **ETHICS AND INFORMATION DISSIMINATION**

22 Ethical considerations arising from this study are addressed below.  
23  
24  
25  
26  
27  
28  
29  
30  
31  
32  
33  
34  
35  
36  
37  
38  
39  
40  
41  
42  
43  
44  
45  
46  
47  
48  
49  
50  
51  
52  
53  
54  
55  
56  
57  
58  
59  
60

### 24 **Consent and freedom to withdraw**

1  
2  
3 1 Participants' questions or concerns will be addressed individually and with all due diligence.  
4  
5 2 Participants will be free to withdraw from the study at any point and can remove the camera  
6  
7 at any time during the study day without giving a reason. The decision to join the study will  
8  
9 have no consequence on their relationship with either Macquarie University or their health  
10  
11 professionals.  
12  
13  
14  
15  
16

### 17 **Third-party and bystander consent**

18  
19 8 The research team will provide participants with a wallet-sized card that includes the  
20  
21 statement below with contact information of the research team, which can be shown to others  
22  
23 (to reduce the psychological burden of the participant) should anyone approach the  
24  
25 participants to ask about the camera.  
26  
27  
28  
29  
30

31 13 *"I am volunteering for a research project. The device is a wearable camera and the images*  
32  
33 *will be used to record my daily activities. I am happy to remove it if you would like me to."*  
34  
35  
36  
37

38 16 Should anyone request video recordings to be deleted, we ask participants to take note of the  
39  
40 time that requests were made, and to assure the enquirer that the related recordings will be  
41  
42 removed at the post-study session. Participants are also asked to inform their household  
43  
44 members, friends, and acquaintances about the study, and to seek permission from these  
45  
46 parties prior to recording.  
47  
48  
49  
50

### 51 **Personal privacy**

52  
53 23 Participants will be asked to keep the body-worn camera off during situations when anyone  
54  
55 (including themselves) is dressing, undressing, using the bathroom, showering, or during any  
56  
57  
58  
59  
60

1 situations where privacy is of concern. Participants will be advised that they should always  
2 prioritise their own personal safety and comfort above the study's requirements.

3  
4 Furthermore, participants will be able to view and delete any (or all) of the extracted images  
5 before researchers view the images or videos at the start of the post-study session. The videos  
6 will be deleted immediately after screenshots are extracted. Only members of the research  
7 team will have access to the screenshots. None of the video or screenshots will be released to  
8 the public, academic peers, or participants. Should participants provide written informed  
9 consent for the research team to use their images in publications or presentations, the images  
10 will be blurred such that no one is identifiable.

11  
12 To ensure the participant's privacy, names and other identifying information will be removed  
13 in the photos of medications.

### 14 15 **Participant feedback**

16 Participants will be asked about their experiences in the study during the post-study  
17 interview. A questionnaire to assess the participant's experience (Appendix 5) will also be  
18 administered. Participants will be provided with contact details of the research team (email  
19 and phone number) for contact during the study.

### 20 21 **Psychological support**

22 In the unlikely case that participants become psychologically distressed during either of the  
23 interview sessions, a staff member with counselling experience will be present in both  
24 interviews to deal with any anxiety the participant may experience. Should participants  
25 experience high levels of distress during the study day, they are advised that they should

1  
2  
3 1 immediately attend their local hospital emergency department, general practitioner, and/or  
4  
5 2 call Lifeline or Emergency Services.  
6  
7  
8 3

9  
10 4 **Participant Identification**

11  
12 5 Participant identities will not be masked during data collection. Participants will be  
13  
14 6 individually identifiable due to the small sample size. However, their identities will only be  
15  
16 7 known to the research team, and only members of the research team will have access to  
17  
18 8 identifiable data. Data will be separated from contact details and stored in separate locations.  
19  
20 9 No identifying information about the participant will be published or presented.  
21  
22  
23  
24 10

25  
26 11 **Information dissemination**

27  
28 12 Great caution will be taken in the handling and storage of the data by the research team so  
29  
30 13 that risks to privacy are minimised, in accordance with the Australian Code for the  
31  
32 14 Responsible Conduct of Research. Only members of the research team will have access to the  
33  
34 15 data. The videos will be downloaded into a secure browser in a password-protected computer  
35  
36 16 or Macquarie University servers. All physical copies of surveys and questionnaires will be  
37  
38 17 locked in secure cabinets at Macquarie University. The data will be held for a minimum of 5  
39  
40 18 years. Anonymity will be upheld throughout reporting, and participants will only be referred  
41  
42 19 to by their participant number.  
43  
44  
45  
46  
47 20

48  
49 21 **DISCUSSION**

50  
51 22 At the time of writing, the study had engaged 40 potential participants and 23 participants  
52  
53 23 completed the study, more than half of the number of participants the study aims for.  
54  
55  
56 24  
57  
58  
59  
60

1  
2  
3 1 The reasons some potential participants did not take part in the study included: declined  
4  
5 2 consent due to personal reasons (which the participate did not disclose), unable to  
6  
7 3 communicate in English to a sufficient standard (as judged by the researcher during the initial  
8  
9 4 phone call), too busy with work, too busy due to full-time care of family members, going on  
10  
11 5 a holiday, was sick on the scheduled visit and withdrew from the study, was not home when  
12  
13 6 the researchers visited and withdrew from the study. No participant who completed the study  
14  
15 7 had withdrawn their consent to date.  
16  
17  
18  
19  
20  
21  
22  
23

24 9 Completion rates for the time-use diary is very high, with 21 out of 23 participants  
25  
26 10 successfully filling the diary throughout the study day. The two participants who did not fill  
27  
28 11 in the diary did so during the post-study interview, with the assistance of recorded footage.  
29  
30  
31  
32

33 13 All participants complied to continuous camera recording. There was a variation of camera  
34  
35 14 recording time between participants, due to some participants turning the camera off for some  
36  
37 15 periods of time out of privacy concerns.  
38  
39  
40  
41

42 17 One challenge the study had faced was communicating camera operations effectively to the  
43  
44 18 participants. Some participants had difficulty turning off the camera and charging the camera  
45  
46 19 battery due to reasons such as forgetfulness and confusion regarding the orientation of the  
47  
48 20 camera buttons. To address the issue, the research team had devoted more time during the  
49  
50 21 pre-study interview to physically demonstrate how to use the camera, which had successfully  
51  
52 22 improved participant understanding of camera operations.  
53  
54  
55

56 24 **Author's contributions:**  
57  
58  
59  
60

1  
2  
3 1 Study conceptualisation: AL, EC; Study design: AL, KY, TH, JG; Data collection  
4  
5 2 preparation and analysis plan: KY, TH, AL, LL, FR; Recruitment and liaison: KH, SV; First  
6  
7 3 draft: KY, AL; Draft revision: all authors provided feedback and approved the manuscript.  
8  
9  
10 4

11  
12 5 **Acknowledgements:**

- 13  
14  
15 6 • Financial: The project is supported by New South Wales Health Early-to-Mid Career  
16  
17 7 Research Fellowship awarded to AL. The funding body did not have a role in study  
18  
19 8 design and execution; data collection, management, analysis, and interpretation; or  
20  
21 9 manuscript preparation, review, or approval.  
22  
23  
24 10 • Protocols: The authors of this paper wish to acknowledge the researchers who designed  
25  
26 11 and carried out the CAPTURE-24 Project carried out at the University of Oxford: Teresa  
27  
28 12 Harms (University of Oxford, Department of Sociology, Centre for Time Use Research,  
29  
30 13 Oxford, OX2 6HP United Kingdom), Jonathan Gershuny (University of Oxford,  
31  
32 14 Department of Sociology, Centre for Time Use Research, Oxford, OX2 6HP United  
33  
34 15 Kingdom), Aiden Doherty (Nuffield Department of Population Health, University of  
35  
36 16 Oxford, UK), Emma Thomas (Melbourne School of Population and Global Health,  
37  
38 17 University of Melbourne, Australia), Karen Milton (Norwich Medical School, University  
39  
40 18 of East Anglia, Norwich, UK), Charlie Foster (School for Policy Studies, University of  
41  
42 19 Bristol, UK).  
43  
44  
45  
46  
47 20 • Technical: The screenshot extraction and tagging system was developed in-house by Mr  
48  
49 21 Wen-Jun Liang and Mr Joshua Haddrill, two work placement students from the Faculty  
50  
51 22 of Engineering at Macquarie University.  
52  
53  
54 23 • Study: Mr Joshua Jung, Ms Isabelle Barnes, Mr Jiawei He, and Mr Christian Tran (work  
55  
56 24 placement students from Macquarie University) assisted with participant recruitment,  
57  
58 25 home visits, and administrative tasks.  
59  
60



- 1
- 2
- 3
- 4 1 • Participant recruitment: Professor Bernard Tuch and Dr Priscilla Wong, who assisted
- 5
- 6 2 with recruitment at the early stages of the study.
- 7
- 8 3 • Drafting the manuscript: Dr Theun Pieter van Tienoven from the University of New
- 9
- 10 4 South Wales, for his valuable comments and suggestions on earlier drafts of the
- 11
- 12 5 manuscript.
- 13
- 14
- 15 6 • The authors would like to thank the study participants for their valuable time and input.
- 16
- 17 7

18

19

20 8 **Competing interests:**

21

22 9 Some participants may be recruited via the Macquarie Health General Practitioner clinic and

23

24 10 Macquarie Hospital, where SV is practicing as a general practitioner and KH is practicing as

25

26 11 an endocrinologist, respectively. Therefore, the two team members may be responsible for

27

28 12 the treatment of some participants. However, SV and KH will not know whether a patient is a

29

30 13 participant unless the participant informs them.

31

32

33 14

34

35 15 Figure 1: Flow diagram illustrating the tasks involved at each stage of the study.

36 16 Figure 2: Instructions provided to participants regarding the operation of the body-worn

37

38 17 camera.

39

40

41

42 18

43

44

45 19

46

47 20

48

49 21 **References**

- 50
- 51
- 52 22 1. Lorig KR, Holman HR. Self-management education: History, definition, outcomes, and
- 53 23 mechanisms *Ann Behav Med* 2003;26(1):1-7. doi:
- 54 24 [https://doi.org/10.1207/S15324796ABM2601\\_01](https://doi.org/10.1207/S15324796ABM2601_01)
- 55 25 2. Kaptein AA, Fischer MJ, Scharloo M. Self-management in patients with COPD: theoretical
- 56 26 context, content, outcomes, and integration into clinical care. *Int J Chron Obstruct*
- 57 27 *Pulmon Dis* 2014;9:907-17. doi: <http://dx.doi.org/10.2147/COPD.S49622>
- 58
- 59
- 60

- 1 3. Apps LD, Harrison SL, Williams JEA, et al. How do informal self-care strategies evolve  
2 among patients with chronic obstructive pulmonary disease managed in primary  
3 care? A qualitative study. *Int J Chron Obstruct Pulmon Dis* 2014;9:257-63. doi:  
4 <http://dx.doi.org/10.2147/COPD.S52691>
- 5 4. Bodenheimer T, Lorig K, Holman H, et al. Patient Self-management of Chronic Disease in  
6 Primary Care. *J Am Med Assoc* 2002;288:2469-75.
- 7 5. Clark NM, Gong M, Kaciroti N. A Model of Self-Regulation for Control of Chronic Disease.  
8 *Health Educ Behav* 2001;28:769-82. doi: 10.1177/109019810102800608
- 9 6. Liddy C, Blazkho V, Mill K. Challenges of self-management when living with multiple  
10 chronic conditions: Systematic review of the qualitative literature. *Can Fam Physician*  
11 2014;60(12):1123-33.
- 12 7. Koch G, Wakefield BJ, Wakefield DS. Barriers and Facilitators to Managing Multiple  
13 Chronic Conditions: A Systematic Literature Review. *West J Nurs Res* 2015;37(4):498-  
14 516.
- 15 8. Ong BN, Jinks C, Morden A. The hard work of self-management: Living with chronic knee  
16 pain. *International Journal of Qualitative Studies on Health and Well-being*  
17 2011;6(3):10.3402/qhw.v6i3.7035. doi: doi:10.3402/qhw.v6i3.7035
- 18 9. Yen L, McRae IS, Jowsey T, et al. Health work by older people with chronic illness: how  
19 much time does it take? . *Chronic Illness* 2013;9(4):268-82. doi:  
20 <https://doi.org/10.1177/1742395313476720>
- 21 10. van Houtum L, Rijken M, Groenewegen P. Do everyday problems of people with chronic  
22 illness interfere with their disease management? *BMC Public Health* 2015;15:1000.  
23 doi: <https://doi.org/10.1186/s12889-015-2303-3>
- 24 11. Cheraghi-Sohi S, Morden A, Bower P, et al. Exploring patient priorities among long-term  
25 conditions in multimorbidity: A qualitative secondary analysis *SAGE Open Medicine*  
26 2013;1 doi: <https://doi.org/10.1177/2050312113503955>
- 27 12. Dwarswaard J, Bakker EJM, van Staa A, et al. Self-management support from the  
28 perspective of patients with a chronic condition: a thematic synthesis of qualitative  
29 studies. *Health Expect* 2015;19(2):194-208. doi: <https://doi.org/10.1111/hex.12346>
- 30 13. Sadler E, Wolfe CDA, McKeivitt C. Lay and health care professional understandings of  
31 self-management: A systematic review and narrative synthesis *SAGE Open Medicine*  
32 2014;2014(2) doi: <https://doi.org/10.1177/2050312114544493>
- 33 14. Thille P, Ward N, Russell G. Self-management support in primary care: Enactments,  
34 disruptions, and conversational consequences. *Soc Sci Med* 2014;108:97-105. doi:  
35 <http://dx.doi.org/10.1016/j.socscimed.2014.02.041>
- 36 15. Crowley MJ, Holleman R, Klamerus ML, et al. Factors associated with persistent poorly  
37 controlled diabetes mellitus: Clues to improving management in patients with  
38 resistant poor control. *Chronic Illness* 2014;10(4):291-302. doi:  
39 10.1177/1742395314523653
- 40 16. Free C, Phillips G, Galli L, et al. The Effectiveness of Mobile-Health Technology-Based  
41 Health Behaviour Change or Disease Management Interventions for Health Care  
42 Consumers: A Systematic Review. *PLoS Med* 2013;10(1):e1001362. doi:  
43 10.1371/journal.pmed.1001362
- 44 17. Alzubaidi H, Namara KM, Browning C. Time to question diabetes self-management  
45 support for Arabic-speaking migrants: exploring a new model of care. *Diabet Med*  
46 2017;34:348-55. doi: 10.1111/dme.13286

- 1  
2  
3 1 18. Schinckus L, Dangoisse F, Broucke SVd, et al. When knowing is not enough: Emotional  
4 2 distress and depression reduce the positive effects of health literacy on diabetes  
5 3 self-management. *Patient Educ Couns* 2017 doi:  
6 4 <http://dx.doi.org/10.1016/j.pec.2017.08.006>  
7 5  
8 5 19. Valdez RS, Gibbons MC, Siegel ER, et al. Designing consumer health IT to enhance  
9 6 usability among different racial and ethnic groups within the United States. *Health  
10 7 and technology* 2012;2:225-33. doi: 10.1007/s12553-012-0031-6  
11 8  
12 8 20. Farvolden P, Denisoff E, Selby P, et al. Usage and Longitudinal Effectiveness of a Web-  
13 9 Based Self-Help Cognitive Behavioral Therapy Program for Panic Disorder. *J Med  
14 10 Internet Res* 2005;7(1):e7. doi: 10.2196/jmir.7.1.e7  
15 11  
16 11 21. Eysenbach G. The Law of Attrition. *J Med Internet Res* 2005;7(1):e11. doi:  
17 12 10.2196/jmir.7.1.e11  
18 13  
19 13 22. Yu CH, Bahniwal R, Laupacis A, et al. Systematic review and evaluation of web-accessible  
20 14 tools for management of diabetes and related cardiovascular risk factors by patients  
21 15 and healthcare providers. *J Am Med Inform Assoc* 2012;19:514e22. doi:  
22 16 10.1136/amiajnl-2011-000307  
23 17  
24 17 23. Valdez RS, Holden RJ, Novak LL, et al. Transforming consumer health informatics through  
25 18 a patient work framework: connecting patients to context. *J Am Med Inform Assoc*  
26 19 2015;22:2-10. doi: doi:10.1136/amiajnl-2014-002826  
27 20  
28 20 24. Mickelson RS, Holden RJ. Medication management strategies used by older adults with  
29 21 heart failure: A systems-based analysis. *Eur J Cardiovasc Nurs* 2017;1(11) doi:  
30 22 10.1177/1474515117730704  
31 23  
32 23 25. Mickelson RS, Unertl KM, Holden RJ. Medication Management: The Macrocognitive  
33 24 Workflow of Older Adults With Heart Failure. *JIMR Human Factors* 2016;3(2):e27.  
34 25 doi: 10.2196/humanfactors.6338  
35 26  
36 26 26. Khunti K, Davies MJ, Kalra S. Self-titration of insulin in the management of people with  
37 27 type 2 diabetes: a practical solution to improve management in primary care.  
38 28 *Diabetes Obes Metab* 2013;15(8):690-700. doi: 10.1111/dom.12053  
39 29  
40 29 27. Holden RJ, Valdez RS, Schubert CC, et al. Macroergonomic factors in the patient work  
41 30 system: examining the context of patients with chronic illness. *Ergonomics*  
42 31 2017;16(1):26-43. doi: 10.1080/00140139.2016.1168529  
43 32  
44 32 28. Holden RJ, Schubert CC, Mickelson RS. The patient work system: An analysis of self-care  
45 33 performance barriers among elderly heart failure patients and their informal  
46 34 caregivers. *Appl Ergon* 2015;March:133-50. doi: 10.1016/j.apergo.2014.09.009  
47 35  
48 35 29. Carayon P, Karsh B-T, Gurses AP, et al. Macroergonomics in Healthcare Quality and  
49 36 Patient Safety. *Review of Human Factors and Ergonomics* 2013;8(1):4-54. doi:  
50 37 10.1177/1557234X13492976  
51 38  
52 38 30. Heiden SM, Holden RJ, Alder CA, et al. Human factors in mental healthcare: A work  
53 39 system analysis of a community-based program for older adults with depression and  
54 40 dementia. *Appl Ergon* 2017;64:27-40. doi: doi.org/10.1016/j.apergo.2017.05.002  
55 41  
56 41 31. McCambridge J, Witton J, Elbourne DR. Systematic review of the Hawthorne effect: New  
57 42 concepts are needed to study research participation effects. *J Clin Epidemiol*  
58 43 2014;67(3) doi: doi.org/10.1016/j.jclinepi.2013.08.015  
59 44  
60 44 32. Khazrai YM, Defeudis G, Pozzilli P. Effect of diet on type 2 diabetes mellitus: a review.  
45 *Diabetes Metab Res Rev* 2014;30(Suppl. 1):24-33. doi: 0.1002/dmrr.2515  
46  
47 46 33. Wilding JPH. The importance of weight management in type 2 diabetes mellitus. *Int J  
48 Clin Pract* 2014;68(6):682-91. doi: 10.1111/ijcp.12384

- 1  
2  
3 1 34. Balducci S, Sacchetti M, Haxhi J, et al. Physical exercise as therapy for type 2 diabetes  
4 2 mellitus. *Diabetes Metab Res Rev* 2014;Suppl. 1:13-23. doi: 10.1002/dmrr.2514  
5 3  
6 3 35. Costa LA, Canani LH, Lisbôa HRK, et al. Aggregation of features of the metabolic  
7 4 syndrome is associated with increased prevalence of chronic complications in Type 2  
8 5 diabetes. *Diabet Med* 2004;21(3):252-55. doi: 10.1046/j.1464-5491.2003.01124.x  
9 6  
10 6 36. Bosi E, Scavini M, Ceriello A, et al. Intensive Structured Self-Monitoring of Blood Glucose  
11 7 and Glycemic Control in Noninsulin-Treated Type 2 Diabetes. *Diabetes Care*  
12 8 2013;36(10):2887-94. doi: 10.2337/dc13-0092  
13 9  
14 9 37. Wasem J, Bramlage P, Gitt AK, et al. Co-morbidity but not dysglycaemia reduces quality  
15 10 of life in patients with type-2 diabetes treated with oral mono- or dual combination  
16 11 therapy – an analysis of the DiaRegis registry. *Cardiovasc Diabetol* 2013;12(47) doi:  
17 12 10.1186/1475-2840-12-47  
18 13  
19 13 38. Kannan H, Thompson S, Bolge SC. Economic and Humanistic Outcomes Associated With  
20 14 Comorbid Type-2 Diabetes, High Cholesterol, and Hypertension Among Individuals  
21 15 Who Are Overweight or Obese. *J Occup Environ Med* 2008;50(5):542-9. doi:  
22 16 10.1097/JOM.0b013e31816ed569  
23 17  
24 17 39. Kelly P, Thomas E, Doherty A, et al. Developing a Method to Test the Validity of 24 Hour  
25 18 Time Use Diaries Using Wearable Cameras: A Feasibility Pilot. *PLoS One*  
26 19 2015;e0142198 doi: DOI:10.1371/journal.pone.0142198  
27 20  
28 20 40. Kelly P, Marshall SJ, Badland H, et al. An Ethical Framework for Automated, Wearable  
29 21 Cameras in Health Behavior Research. *Am J Prev Med* 2013;44(3):314-19. doi:  
30 22 <http://dx.doi.org/10.1016/j.amepre.2012.11.006>  
31 23  
32 23 41. Gibbons CJ, Kenning C, Coventry PA, et al. Development of a Multimorbidity Illness  
33 24 Perceptions Scale (MULTIPLeS). *PLoS One* 2013;8(12):e81852. doi:  
34 25 10.1371/journal.pone.0081852  
35 26  
36 26 42. Eurostat. Harmonised European Time Use Surveys 2008 Guidelines. Luxembourg:  
37 27 Eurostat, 2009.  
38 28  
39 28 43. Kelly P, Doherty A, Mizdrak A, et al. High group level validity but high random error of a  
40 29 self-report travel diary, as assessed by wearable cameras. *Journal of Transport &*  
41 30 *Health* 2014;1:190-201.  
42 31  
43 31 44. Doherty AR, Kelly P, Kerr J, et al. Using wearable cameras to categorise type and context  
44 32 of accelerometer-identified episodes of physical activity. *International Journal of*  
45 33 *Behavioral Nutrition and Physical Activity* 2013;10(22) doi:  
46 34 <http://www.ijbnpa.org/content/10/1/22>  
47 35  
48 35 45. Hagger MS, Koch S, Chatzisarantis NLD, et al. The common sense model of self-  
49 36 regulation: Meta-analysis and test of a process model. *Psychol Bull*  
50 37 2017;143(11):1117-54. doi: 10.1037/bul0000118 [published Online First:  
51 38 2017/08/15]  
52 39  
53 39 46. Abadi M, Agarwal A, Barham P, et al. TensorFlow: Large-Scale Machine Learning on  
54 40 Heterogeneous Distributed Systems. 2016 doi: arXiv:1603.04467v2 [cs.DC]  
55 41  
56 41 47. Oxford Uo. MULTINATIONAL TIME USE STUDY - USER'S GUIDE AND DOCUMENTATION,  
57 42 2012.  
58 43  
59 43 48. Braun V, Clarke V. Using thematic analysis in psychology. *Qual Res Psychol* 2006;3(2):77-  
60 44 101. doi: <http://dx.doi.org/10.1191/1478088706qp063oa>



Figure 1: Flow diagram illustrating the tasks involved at each stage of the study.

108x60mm (300 x 300 DPI)

1  
2  
3  
4  
5  
6  
7  
8  
9  
10  
11  
12  
13  
14  
15  
16  
17  
18  
19  
20  
21  
22  
23  
24  
25  
26  
27  
28  
29  
30  
31  
32  
33  
34  
35  
36  
37  
38  
39  
40  
41  
42  
43  
44  
45  
46  
47  
48  
49  
50  
51  
52  
53  
54  
55  
56  
57  
58  
59  
60

|                                                                                     |                                                                                                                                                                            |                                                                                            |
|-------------------------------------------------------------------------------------|----------------------------------------------------------------------------------------------------------------------------------------------------------------------------|--------------------------------------------------------------------------------------------|
|                                                                                     |                                                                                           | <p>Recording</p>                                                                           |
|                                                                                     |                                                                                           | <p>Recording,<br/>low<br/>battery</p>                                                      |
|   |                                                                                                                                                                            | <p>Not<br/>recording:<br/>Red = needs<br/>charging<br/>Green =<br/>battery is<br/>okay</p> |
|                                                                                     |                                                                                          | <p>Flat<br/>battery<br/>needs<br/>charging</p>                                             |
|  | <p>→ <b>Button</b><br/>Press Once to turn on<br/>(red record light will<br/>come on)<br/>Hold to turn off (Red<br/>record light turns off)</p> <p>→ <b>Camera Lens</b></p> |                                                                                            |

Figure 2: Instructions provided to participants regarding the operation of the body-worn camera.

77x112mm (300 x 300 DPI)



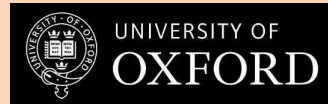

# Time Use Diary

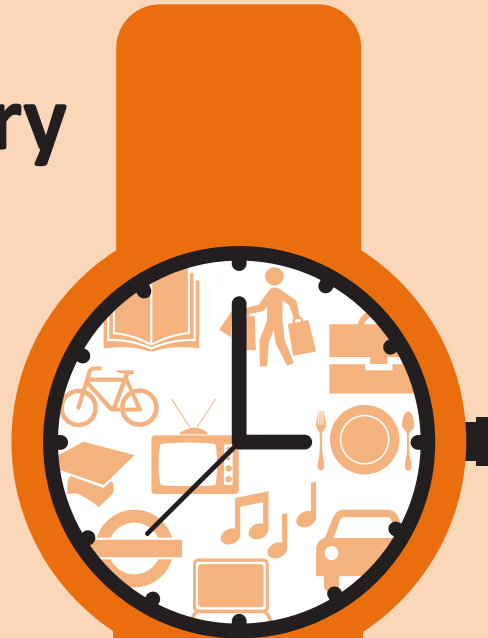

Person number

Please complete this diary on

# Diary instructions

**Please read the instructions below to help you fill in your diary. There is also an example of a filled in diary on the next page to help you.**

## When should I fill in the diary?

- The front of the diary tells you which day we would like you to complete the diary for.
- The diary starts at 4am and covers 24 hours, with three hours on each page.
- Please take the diary with you during the day and fill it in every now and then when you have a spare moment. For example on the bus or train, at lunchtime or while you wait for someone.

## Completing the diary

### What were you doing?

- In this column, record what you consider to be your main activity for each 10 minute period.
- If you were doing more than one activity at the same time, only record the main activity in this column.
- If you did one thing after another during the 10 minutes, record the activity that took the most time.
- If you were doing something you feel is too private to record, please write "personal".

## Work

- You don't need to record exactly what you were doing during work time.
- If you have more than one job, please record which one you were working at.
- Please record what you did during breaks. For example, "Lunch break, had lunch" or "Lunch break, went for a walk".
- Include any work you've taken home and completed at home.

## School / college

- Please record whether you study at home or attend classes / lectures.
- Include the type of study, such as secondary school, university etc.
- If the studies are part of paid work, please note this in the diary.

## Housework and childcare

- Please record what you were really doing. For example, "Cooked supper", "Washed the dishes", "Put my child to bed", "Mowed the lawn", "Cleaned the house", "Washed the car".

## Sleeping

- Please record any occasions during the night when you weren't sleeping. For example, if you have woken up and are doing nothing, reading or caring for children etc.

## Reading

- If you were reading, please record what you read. For example, "Read a newspaper", "Read a magazine", "Read a book".
- If you were reading on a tablet or e-reader such as a Kindle, please remember to fill in the 'Did you use a smartphone, tablet or computer?' column.

## Help to other households

- If you were helping someone who lives outside of your household, either totally or in part, please report this in the diary.
- For example, if you helped a friend repair their house, record this as "Helped friend repairing house". If you bought a neighbour some food while you did your own shopping, please record this too.

## If you did something else at the same time, what else did you do?

- You should use this column to record any activities that you were doing at the same time as your main activity. These are called secondary activities.
- For example, if you were looking after your child (main activity) and watching television at the same time, then you would record "watching television" in this column.
- It is up to you which activity you think is the main activity and which is the secondary activity.
- Don't forget to record secondary activities during lunch or coffee breaks during work or while travelling.

## Did you use a smartphone, tablet or computer?

- Please record in this column whether you were using a smartphone, tablet or computer while you were doing either the main or secondary activity and how long you were using it for. For example, if you were travelling to town on the bus and were checking emails on your smartphone then record how long you were using it for.
- Draw a line or arrow to indicate how long you spent using your smartphone, tablet or computer.

## Where were you?

- This column is to record where you were during the activity and if you were travelling, what your mode of transport was. For example, "at home", "at work", "by car".

## Were you alone or with somebody you know?

- Please indicate whether you were alone or together with somebody you know.
- To be together does not necessarily mean that you actually do things together but rather that somebody else was around.
- Draw a line or arrow to show how long you were alone or with somebody you know. This may change during an activity. For example, somebody might leave or arrive.
- If you were with a child aged 7 years or younger who lives with you, record this in the column 'Children aged 0-7'. If you were with a child aged older than 7 years who lives with you then record this in the 'Other person' column.
- If you were with a relative that doesn't live with you, record this in the 'Others you know' column.

## How much did you enjoy this time?

- Please write in how much you enjoyed the time on a scale of 1 to 7, with 1 meaning you didn't enjoy it at all and 7 meaning that you enjoyed it very much.
- Your level of enjoyment may change during an activity. If so, please record the new level of enjoyment too.

## Checklist

- When you have finished filling in your diary, please answer the checklist questions at the end of the diary day.
- There is also a checklist to remind you of the key things to remember to record.



# Example

- Record your main activity for each 10-minute period
- Only one main activity on each line!
- Distinguish between first and second job, if any.
- Distinguish between travel and the activity that is the reason for travelling.
- Don't forget the mode of transport or location and whether you were using a smartphone, tablet or computer.
- Please remember to record who you were with.

- For each 10-minute period, please write in how much you enjoyed this time on a scale of 1 to 7, with 1 meaning you didn't enjoy it at all and 7 meaning that you enjoyed it very much.
- For example, if you didn't enjoy an activity at all then you would write 1 in the box.

This includes children aged 8 and over

## Time: 7am – 10am Morning

| Time: 7am-10am Morning (am) | What were you doing?<br>Please write down one main activity. | If you did something else at the same time, what else did you do? | Did you use a smartphone, tablet, or computer? | Where were you?<br>Location, or mode of transport | Were you alone or with somebody you know?<br>Mark all relevant boxes |                          |                          |                          |                          |                          | How much did you enjoy this time?<br>1 = not at all<br>7 = very much |                 |
|-----------------------------|--------------------------------------------------------------|-------------------------------------------------------------------|------------------------------------------------|---------------------------------------------------|----------------------------------------------------------------------|--------------------------|--------------------------|--------------------------|--------------------------|--------------------------|----------------------------------------------------------------------|-----------------|
|                             |                                                              |                                                                   |                                                |                                                   | Alone                                                                | Spouse / partner         | Mother                   | Father                   | Child aged 0-7           | Other person             |                                                                      | Others you know |
| 7am-7.10                    | Woke up the children                                         |                                                                   | <input type="checkbox"/>                       | At home                                           | <input type="checkbox"/>                                             | <input type="checkbox"/> | <input type="checkbox"/> | <input type="checkbox"/> | <input type="checkbox"/> | <input type="checkbox"/> | <input type="checkbox"/>                                             | 5               |
| 7.10-7.20                   | Had breakfast                                                | checked emails                                                    | <input checked="" type="checkbox"/>            | on foot                                           | <input type="checkbox"/>                                             | <input type="checkbox"/> | <input type="checkbox"/> | <input type="checkbox"/> | <input type="checkbox"/> | <input type="checkbox"/> | <input type="checkbox"/>                                             | 6               |
| 7.20-7.30                   | "                                                            | Talked with my family                                             | <input type="checkbox"/>                       |                                                   | <input type="checkbox"/>                                             | <input type="checkbox"/> | <input type="checkbox"/> | <input type="checkbox"/> | <input type="checkbox"/> | <input type="checkbox"/> | <input type="checkbox"/>                                             | 5               |
| 7.30-7.40                   | Cleared the table                                            | Listened to the radio                                             | <input checked="" type="checkbox"/>            |                                                   | <input type="checkbox"/>                                             | <input type="checkbox"/> | <input type="checkbox"/> | <input type="checkbox"/> | <input type="checkbox"/> | <input type="checkbox"/> | <input type="checkbox"/>                                             | 4               |
| 7.40-7.50                   | Helped the children dressing                                 | Talked with my children                                           | <input type="checkbox"/>                       | on foot                                           | <input checked="" type="checkbox"/>                                  | <input type="checkbox"/> | <input type="checkbox"/> | <input type="checkbox"/> | <input type="checkbox"/> | <input type="checkbox"/> | <input type="checkbox"/>                                             | 7               |
| 8am-8.10                    | "                                                            |                                                                   | <input type="checkbox"/>                       |                                                   | <input type="checkbox"/>                                             | <input type="checkbox"/> | <input type="checkbox"/> | <input type="checkbox"/> | <input type="checkbox"/> | <input type="checkbox"/> | <input type="checkbox"/>                                             |                 |
| 8.10-8.20                   | Went to the day care centre                                  |                                                                   | <input type="checkbox"/>                       |                                                   | <input type="checkbox"/>                                             | <input type="checkbox"/> | <input type="checkbox"/> | <input type="checkbox"/> | <input type="checkbox"/> | <input type="checkbox"/> | <input type="checkbox"/>                                             | 1               |

Use an arrow or quote marks to record that an activity lasted longer than 10 minutes.

1  
2  
3  
4  
5  
6  
7  
8  
9  
10  
11  
12  
13  
14  
15  
16  
17  
18  
19  
20  
21  
22  
23  
24  
25  
26  
27  
28  
29  
30  
31  
32  
33  
34  
35  
36  
37  
38  
39  
40  
41  
42  
43  
44  
45  
46  
47  
48  
49  
50  
51  
52  
53  
54  
55  
56  
57  
58  
59  
60

| Time: 4am – 7am<br>Early morning |                                                              | Time: 4am – 7am                                                                                                     |                                                   | Were you alone or with somebody you know?<br>Mark all relevant boxes |                          |                          |                          |                          |                          |                          | How much did you enjoy this time?<br>1 = not at all<br>7 = very much |
|----------------------------------|--------------------------------------------------------------|---------------------------------------------------------------------------------------------------------------------|---------------------------------------------------|----------------------------------------------------------------------|--------------------------|--------------------------|--------------------------|--------------------------|--------------------------|--------------------------|----------------------------------------------------------------------|
|                                  |                                                              |                                                                                                                     |                                                   | People who live with you                                             |                          |                          |                          |                          |                          |                          |                                                                      |
| Time:<br>4am-7am<br>Morning (am) | What were you doing?<br>Please write down one main activity. | Did you use a smartphone, tablet, or computer?<br>If you did something else at the same time, what else did you do? | Where were you?<br>Location, or mode of transport | Alone                                                                | Spouse / partner         | Mother                   | Father                   | Child aged 0-7           | Other person             | Others you know          |                                                                      |
| 4am-4.10                         |                                                              | <input type="checkbox"/>                                                                                            |                                                   | <input type="checkbox"/>                                             | <input type="checkbox"/> | <input type="checkbox"/> | <input type="checkbox"/> | <input type="checkbox"/> | <input type="checkbox"/> | <input type="checkbox"/> |                                                                      |
| 4.10-4.20                        |                                                              | <input type="checkbox"/>                                                                                            |                                                   | <input type="checkbox"/>                                             | <input type="checkbox"/> | <input type="checkbox"/> | <input type="checkbox"/> | <input type="checkbox"/> | <input type="checkbox"/> | <input type="checkbox"/> |                                                                      |
| 4.20-4.30                        |                                                              | <input type="checkbox"/>                                                                                            |                                                   | <input type="checkbox"/>                                             | <input type="checkbox"/> | <input type="checkbox"/> | <input type="checkbox"/> | <input type="checkbox"/> | <input type="checkbox"/> | <input type="checkbox"/> |                                                                      |
| 4.30-4.40                        |                                                              | <input type="checkbox"/>                                                                                            |                                                   | <input type="checkbox"/>                                             | <input type="checkbox"/> | <input type="checkbox"/> | <input type="checkbox"/> | <input type="checkbox"/> | <input type="checkbox"/> | <input type="checkbox"/> |                                                                      |
| 4.40-4.50                        |                                                              | <input type="checkbox"/>                                                                                            |                                                   | <input type="checkbox"/>                                             | <input type="checkbox"/> | <input type="checkbox"/> | <input type="checkbox"/> | <input type="checkbox"/> | <input type="checkbox"/> | <input type="checkbox"/> |                                                                      |
| 4.50-5am                         |                                                              | <input type="checkbox"/>                                                                                            |                                                   | <input type="checkbox"/>                                             | <input type="checkbox"/> | <input type="checkbox"/> | <input type="checkbox"/> | <input type="checkbox"/> | <input type="checkbox"/> | <input type="checkbox"/> |                                                                      |
| 5am-5.10                         |                                                              | <input type="checkbox"/>                                                                                            |                                                   | <input type="checkbox"/>                                             | <input type="checkbox"/> | <input type="checkbox"/> | <input type="checkbox"/> | <input type="checkbox"/> | <input type="checkbox"/> | <input type="checkbox"/> |                                                                      |
| 5.10-5.20                        |                                                              | <input type="checkbox"/>                                                                                            |                                                   | <input type="checkbox"/>                                             | <input type="checkbox"/> | <input type="checkbox"/> | <input type="checkbox"/> | <input type="checkbox"/> | <input type="checkbox"/> | <input type="checkbox"/> |                                                                      |
| 5.20-5.30                        |                                                              | <input type="checkbox"/>                                                                                            |                                                   | <input type="checkbox"/>                                             | <input type="checkbox"/> | <input type="checkbox"/> | <input type="checkbox"/> | <input type="checkbox"/> | <input type="checkbox"/> | <input type="checkbox"/> |                                                                      |
| 5.30-5.40                        |                                                              | <input type="checkbox"/>                                                                                            |                                                   | <input type="checkbox"/>                                             | <input type="checkbox"/> | <input type="checkbox"/> | <input type="checkbox"/> | <input type="checkbox"/> | <input type="checkbox"/> | <input type="checkbox"/> |                                                                      |
| 5.40-5.50                        |                                                              | <input type="checkbox"/>                                                                                            |                                                   | <input type="checkbox"/>                                             | <input type="checkbox"/> | <input type="checkbox"/> | <input type="checkbox"/> | <input type="checkbox"/> | <input type="checkbox"/> | <input type="checkbox"/> |                                                                      |
| 5.50-6am                         |                                                              | <input type="checkbox"/>                                                                                            |                                                   | <input type="checkbox"/>                                             | <input type="checkbox"/> | <input type="checkbox"/> | <input type="checkbox"/> | <input type="checkbox"/> | <input type="checkbox"/> | <input type="checkbox"/> |                                                                      |
| 6am-6.10                         |                                                              | <input type="checkbox"/>                                                                                            |                                                   | <input type="checkbox"/>                                             | <input type="checkbox"/> | <input type="checkbox"/> | <input type="checkbox"/> | <input type="checkbox"/> | <input type="checkbox"/> | <input type="checkbox"/> |                                                                      |
| 6.10-6.20                        |                                                              | <input type="checkbox"/>                                                                                            |                                                   | <input type="checkbox"/>                                             | <input type="checkbox"/> | <input type="checkbox"/> | <input type="checkbox"/> | <input type="checkbox"/> | <input type="checkbox"/> | <input type="checkbox"/> |                                                                      |
| 6.20-6.30                        |                                                              | <input type="checkbox"/>                                                                                            |                                                   | <input type="checkbox"/>                                             | <input type="checkbox"/> | <input type="checkbox"/> | <input type="checkbox"/> | <input type="checkbox"/> | <input type="checkbox"/> | <input type="checkbox"/> |                                                                      |
| 6.30-6.40                        |                                                              | <input type="checkbox"/>                                                                                            |                                                   | <input type="checkbox"/>                                             | <input type="checkbox"/> | <input type="checkbox"/> | <input type="checkbox"/> | <input type="checkbox"/> | <input type="checkbox"/> | <input type="checkbox"/> |                                                                      |
| 6.40-6.50                        |                                                              | <input type="checkbox"/>                                                                                            |                                                   | <input type="checkbox"/>                                             | <input type="checkbox"/> | <input type="checkbox"/> | <input type="checkbox"/> | <input type="checkbox"/> | <input type="checkbox"/> | <input type="checkbox"/> |                                                                      |
| 6.50-7am                         |                                                              | <input type="checkbox"/>                                                                                            |                                                   | <input type="checkbox"/>                                             | <input type="checkbox"/> | <input type="checkbox"/> | <input type="checkbox"/> | <input type="checkbox"/> | <input type="checkbox"/> | <input type="checkbox"/> |                                                                      |

1  
2  
3  
4  
5  
6  
7  
8  
9  
10  
11  
12  
13  
14  
15  
16  
17  
18  
19  
20  
21  
22  
23  
24  
25  
26  
27  
28  
29  
30  
31  
32  
33  
34  
35  
36  
37  
38  
39  
40  
41  
42  
43  
44  
45  
46  
47  
48  
49  
50  
51  
52  
53  
54  
55  
56  
57  
58  
59  
60

| Time: 7am – 10am Morning       |                                                              | Time: 7am – 10am                                                  |                                                | Were you alone or with somebody you know?<br>Mark all relevant boxes |                          |                          |                          |                          |                          |                          |                          |                          |                          |                          |                          |                          |                                                                      |                          |                          |                          |                          |                          |                          |                          |
|--------------------------------|--------------------------------------------------------------|-------------------------------------------------------------------|------------------------------------------------|----------------------------------------------------------------------|--------------------------|--------------------------|--------------------------|--------------------------|--------------------------|--------------------------|--------------------------|--------------------------|--------------------------|--------------------------|--------------------------|--------------------------|----------------------------------------------------------------------|--------------------------|--------------------------|--------------------------|--------------------------|--------------------------|--------------------------|--------------------------|
|                                |                                                              |                                                                   |                                                | People who live with you                                             |                          |                          |                          |                          |                          | Others you know          |                          |                          |                          |                          |                          |                          | How much did you enjoy this time?<br>1 = not at all<br>7 = very much |                          |                          |                          |                          |                          |                          |                          |
| Time:<br>7am-10am Morning (am) | What were you doing?<br>Please write down one main activity. | Did you do something else at the same time, what else did you do? | Did you use a smartphone, tablet, or computer? | Where were you?<br>Location, or mode of transport                    | Spouse / partner         | Mother                   | Father                   | Child aged 0-7           | Other person             | Know                                                                 | Know                     | Know                     | Know                     | Know                     | Know                     | Know                     |                          |
| 7am-7:10                       |                                                              |                                                                   | <input type="checkbox"/>                       |                                                                      | <input type="checkbox"/>                                             | <input type="checkbox"/> | <input type="checkbox"/> | <input type="checkbox"/> | <input type="checkbox"/> | <input type="checkbox"/> | <input type="checkbox"/> | <input type="checkbox"/> |
| 7:10-7:20                      |                                                              |                                                                   | <input type="checkbox"/>                       |                                                                      | <input type="checkbox"/>                                             | <input type="checkbox"/> | <input type="checkbox"/> | <input type="checkbox"/> | <input type="checkbox"/> | <input type="checkbox"/> | <input type="checkbox"/> | <input type="checkbox"/> |
| 7:20-7:30                      |                                                              |                                                                   | <input type="checkbox"/>                       |                                                                      | <input type="checkbox"/>                                             | <input type="checkbox"/> | <input type="checkbox"/> | <input type="checkbox"/> | <input type="checkbox"/> | <input type="checkbox"/> | <input type="checkbox"/> | <input type="checkbox"/> |
| 7:30-7:40                      |                                                              |                                                                   | <input type="checkbox"/>                       |                                                                      | <input type="checkbox"/>                                             | <input type="checkbox"/> | <input type="checkbox"/> | <input type="checkbox"/> | <input type="checkbox"/> | <input type="checkbox"/> | <input type="checkbox"/> | <input type="checkbox"/> |
| 7:40-7:50                      |                                                              |                                                                   | <input type="checkbox"/>                       |                                                                      | <input type="checkbox"/>                                             | <input type="checkbox"/> | <input type="checkbox"/> | <input type="checkbox"/> | <input type="checkbox"/> | <input type="checkbox"/> | <input type="checkbox"/> | <input type="checkbox"/> |
| 7:50-8am                       |                                                              |                                                                   | <input type="checkbox"/>                       |                                                                      | <input type="checkbox"/>                                             | <input type="checkbox"/> | <input type="checkbox"/> | <input type="checkbox"/> | <input type="checkbox"/> | <input type="checkbox"/> | <input type="checkbox"/> | <input type="checkbox"/> |
| 8am-8:10                       |                                                              |                                                                   | <input type="checkbox"/>                       |                                                                      | <input type="checkbox"/>                                             | <input type="checkbox"/> | <input type="checkbox"/> | <input type="checkbox"/> | <input type="checkbox"/> | <input type="checkbox"/> | <input type="checkbox"/> | <input type="checkbox"/> |
| 8:10-8:20                      |                                                              |                                                                   | <input type="checkbox"/>                       |                                                                      | <input type="checkbox"/>                                             | <input type="checkbox"/> | <input type="checkbox"/> | <input type="checkbox"/> | <input type="checkbox"/> | <input type="checkbox"/> | <input type="checkbox"/> | <input type="checkbox"/> |
| 8:20-8:30                      |                                                              |                                                                   | <input type="checkbox"/>                       |                                                                      | <input type="checkbox"/>                                             | <input type="checkbox"/> | <input type="checkbox"/> | <input type="checkbox"/> | <input type="checkbox"/> | <input type="checkbox"/> | <input type="checkbox"/> | <input type="checkbox"/> |
| 8:30-8:40                      |                                                              |                                                                   | <input type="checkbox"/>                       |                                                                      | <input type="checkbox"/>                                             | <input type="checkbox"/> | <input type="checkbox"/> | <input type="checkbox"/> | <input type="checkbox"/> | <input type="checkbox"/> | <input type="checkbox"/> | <input type="checkbox"/> |
| 8:40-8:50                      |                                                              |                                                                   | <input type="checkbox"/>                       |                                                                      | <input type="checkbox"/>                                             | <input type="checkbox"/> | <input type="checkbox"/> | <input type="checkbox"/> | <input type="checkbox"/> | <input type="checkbox"/> | <input type="checkbox"/> | <input type="checkbox"/> |
| 8:50-9am                       |                                                              |                                                                   | <input type="checkbox"/>                       |                                                                      | <input type="checkbox"/>                                             | <input type="checkbox"/> | <input type="checkbox"/> | <input type="checkbox"/> | <input type="checkbox"/> | <input type="checkbox"/> | <input type="checkbox"/> | <input type="checkbox"/> |
| 9am-9:10                       |                                                              |                                                                   | <input type="checkbox"/>                       |                                                                      | <input type="checkbox"/>                                             | <input type="checkbox"/> | <input type="checkbox"/> | <input type="checkbox"/> | <input type="checkbox"/> | <input type="checkbox"/> | <input type="checkbox"/> | <input type="checkbox"/> |
| 9:10-9:20                      |                                                              |                                                                   | <input type="checkbox"/>                       |                                                                      | <input type="checkbox"/>                                             | <input type="checkbox"/> | <input type="checkbox"/> | <input type="checkbox"/> | <input type="checkbox"/> | <input type="checkbox"/> | <input type="checkbox"/> | <input type="checkbox"/> |
| 9:20-9:30                      |                                                              |                                                                   | <input type="checkbox"/>                       |                                                                      | <input type="checkbox"/>                                             | <input type="checkbox"/> | <input type="checkbox"/> | <input type="checkbox"/> | <input type="checkbox"/> | <input type="checkbox"/> | <input type="checkbox"/> | <input type="checkbox"/> |
| 9:30-9:40                      |                                                              |                                                                   | <input type="checkbox"/>                       |                                                                      | <input type="checkbox"/>                                             | <input type="checkbox"/> | <input type="checkbox"/> | <input type="checkbox"/> | <input type="checkbox"/> | <input type="checkbox"/> | <input type="checkbox"/> | <input type="checkbox"/> |
| 9:40-9:50                      |                                                              |                                                                   | <input type="checkbox"/>                       |                                                                      | <input type="checkbox"/>                                             | <input type="checkbox"/> | <input type="checkbox"/> | <input type="checkbox"/> | <input type="checkbox"/> | <input type="checkbox"/> | <input type="checkbox"/> | <input type="checkbox"/> |
| 9:50-10am                      |                                                              |                                                                   | <input type="checkbox"/>                       |                                                                      | <input type="checkbox"/>                                             | <input type="checkbox"/> | <input type="checkbox"/> | <input type="checkbox"/> | <input type="checkbox"/> | <input type="checkbox"/> | <input type="checkbox"/> | <input type="checkbox"/> |

1  
2  
3  
4  
5  
6  
7  
8  
9  
10  
11  
12  
13  
14  
15  
16  
17  
18  
19  
20  
21  
22  
23  
24  
25  
26  
27  
28  
29  
30  
31  
32  
33  
34  
35  
36  
37  
38  
39  
40  
41  
42  
43  
44  
45  
46  
47  
48  
49  
50  
51  
52  
53  
54  
55  
56  
57  
58  
59  
60

| Time: 10am – 1pm<br>Late morning / early afternoon | Time: 10am – 1pm                                             |                                                                                                                     | Were you alone or with somebody you know?<br>Mark all relevant boxes |                          |                          |                          |                          |                          |                          | How much did you enjoy this time?<br>1 = not at all<br>7 = very much |                 |
|----------------------------------------------------|--------------------------------------------------------------|---------------------------------------------------------------------------------------------------------------------|----------------------------------------------------------------------|--------------------------|--------------------------|--------------------------|--------------------------|--------------------------|--------------------------|----------------------------------------------------------------------|-----------------|
|                                                    | What were you doing?<br>Please write down one main activity. | Did you use a smartphone, tablet, or computer?<br>If you did something else at the same time, what else did you do? | Where were you?<br>Location, or mode of transport                    | Alone                    | Spouse / partner         | Mother                   | Father                   | Child aged 0-7           | Other person             |                                                                      | Others you know |
| 10am-10.10                                         |                                                              | <input type="checkbox"/>                                                                                            |                                                                      | <input type="checkbox"/>                                             |                 |
| 10.10-10.20                                        |                                                              | <input type="checkbox"/>                                                                                            |                                                                      | <input type="checkbox"/>                                             |                 |
| 10.20-10.30                                        |                                                              | <input type="checkbox"/>                                                                                            |                                                                      | <input type="checkbox"/>                                             |                 |
| 10.30-10.40                                        |                                                              | <input type="checkbox"/>                                                                                            |                                                                      | <input type="checkbox"/>                                             |                 |
| 10.40-10.50                                        |                                                              | <input type="checkbox"/>                                                                                            |                                                                      | <input type="checkbox"/>                                             |                 |
| 10.50-11am                                         |                                                              | <input type="checkbox"/>                                                                                            |                                                                      | <input type="checkbox"/>                                             |                 |
| 11am-11.10                                         |                                                              | <input type="checkbox"/>                                                                                            |                                                                      | <input type="checkbox"/>                                             |                 |
| 11.10-11.20                                        |                                                              | <input type="checkbox"/>                                                                                            |                                                                      | <input type="checkbox"/>                                             |                 |
| 11.20-11.30                                        |                                                              | <input type="checkbox"/>                                                                                            |                                                                      | <input type="checkbox"/>                                             |                 |
| 11.30-11.40                                        |                                                              | <input type="checkbox"/>                                                                                            |                                                                      | <input type="checkbox"/>                                             |                 |
| 11.40-11.50                                        |                                                              | <input type="checkbox"/>                                                                                            |                                                                      | <input type="checkbox"/>                                             |                 |
| 11.50-12pm                                         |                                                              | <input type="checkbox"/>                                                                                            |                                                                      | <input type="checkbox"/>                                             |                 |
| 12pm-12.10                                         |                                                              | <input type="checkbox"/>                                                                                            |                                                                      | <input type="checkbox"/>                                             |                 |
| 12.10-12.20                                        |                                                              | <input type="checkbox"/>                                                                                            |                                                                      | <input type="checkbox"/>                                             |                 |
| 12.20-12.30                                        |                                                              | <input type="checkbox"/>                                                                                            |                                                                      | <input type="checkbox"/>                                             |                 |
| 12.30-12.40                                        |                                                              | <input type="checkbox"/>                                                                                            |                                                                      | <input type="checkbox"/>                                             |                 |
| 12.40-12.50                                        |                                                              | <input type="checkbox"/>                                                                                            |                                                                      | <input type="checkbox"/>                                             |                 |
| 12.50-1pm                                          |                                                              | <input type="checkbox"/>                                                                                            |                                                                      | <input type="checkbox"/>                                             |                 |

1  
2  
3  
4  
5  
6  
7  
8  
9  
10  
11  
12  
13  
14  
15  
16  
17  
18  
19  
20  
21  
22  
23  
24  
25  
26  
27  
28  
29  
30  
31  
32  
33  
34  
35  
36  
37  
38  
39  
40  
41  
42  
43  
44  
45  
46  
47  
48  
49  
50  
51  
52  
53  
54  
55  
56  
57  
58  
59  
60

| Time: 1pm - 4pm Afternoon    |                                                              | Time: 1pm - 4pm                                                    |                                                | Were you alone or with somebody you know?<br>Mark all relevant boxes |                          |                          |                          |                          |                          |                          | How much did you enjoy this time?<br>1 = not at all<br>7 = very much |   |   |   |   |   |   |   |
|------------------------------|--------------------------------------------------------------|--------------------------------------------------------------------|------------------------------------------------|----------------------------------------------------------------------|--------------------------|--------------------------|--------------------------|--------------------------|--------------------------|--------------------------|----------------------------------------------------------------------|---|---|---|---|---|---|---|
| Time: 1pm-4pm Afternoon (pm) | What were you doing?<br>Please write down one main activity. | Did you use something else at the same time, what else did you do? | Did you use a smartphone, tablet, or computer? | Where were you?<br>Location, or mode of transport                    | Alone                    | Spouse / partner         | Mother                   | Father                   | Child aged 0-7           | Other person             | Others you know                                                      | 1 | 2 | 3 | 4 | 5 | 6 | 7 |
| 1pm-1:10                     |                                                              |                                                                    | <input type="checkbox"/>                       |                                                                      | <input type="checkbox"/>                                             |   |   |   |   |   |   |   |
| 1:10-1:20                    |                                                              |                                                                    | <input type="checkbox"/>                       |                                                                      | <input type="checkbox"/>                                             |   |   |   |   |   |   |   |
| 1:20-1:30                    |                                                              |                                                                    | <input type="checkbox"/>                       |                                                                      | <input type="checkbox"/>                                             |   |   |   |   |   |   |   |
| 1:30-1:40                    |                                                              |                                                                    | <input type="checkbox"/>                       |                                                                      | <input type="checkbox"/>                                             |   |   |   |   |   |   |   |
| 1:40-1:50                    |                                                              |                                                                    | <input type="checkbox"/>                       |                                                                      | <input type="checkbox"/>                                             |   |   |   |   |   |   |   |
| 1:50-2pm                     |                                                              |                                                                    | <input type="checkbox"/>                       |                                                                      | <input type="checkbox"/>                                             |   |   |   |   |   |   |   |
| 2pm-2:10                     |                                                              |                                                                    | <input type="checkbox"/>                       |                                                                      | <input type="checkbox"/>                                             |   |   |   |   |   |   |   |
| 2:10-2:20                    |                                                              |                                                                    | <input type="checkbox"/>                       |                                                                      | <input type="checkbox"/>                                             |   |   |   |   |   |   |   |
| 2:20-2:30                    |                                                              |                                                                    | <input type="checkbox"/>                       |                                                                      | <input type="checkbox"/>                                             |   |   |   |   |   |   |   |
| 2:30-2:40                    |                                                              |                                                                    | <input type="checkbox"/>                       |                                                                      | <input type="checkbox"/>                                             |   |   |   |   |   |   |   |
| 2:40-2:50                    |                                                              |                                                                    | <input type="checkbox"/>                       |                                                                      | <input type="checkbox"/>                                             |   |   |   |   |   |   |   |
| 2:50-3pm                     |                                                              |                                                                    | <input type="checkbox"/>                       |                                                                      | <input type="checkbox"/>                                             |   |   |   |   |   |   |   |
| 3pm-3:10                     |                                                              |                                                                    | <input type="checkbox"/>                       |                                                                      | <input type="checkbox"/>                                             |   |   |   |   |   |   |   |
| 3:10-3:20                    |                                                              |                                                                    | <input type="checkbox"/>                       |                                                                      | <input type="checkbox"/>                                             |   |   |   |   |   |   |   |
| 3:20-3:30                    |                                                              |                                                                    | <input type="checkbox"/>                       |                                                                      | <input type="checkbox"/>                                             |   |   |   |   |   |   |   |
| 3:30-3:40                    |                                                              |                                                                    | <input type="checkbox"/>                       |                                                                      | <input type="checkbox"/>                                             |   |   |   |   |   |   |   |
| 3:40-3:50                    |                                                              |                                                                    | <input type="checkbox"/>                       |                                                                      | <input type="checkbox"/>                                             |   |   |   |   |   |   |   |
| 3:50-4pm                     |                                                              |                                                                    | <input type="checkbox"/>                       |                                                                      | <input type="checkbox"/>                                             |   |   |   |   |   |   |   |

1  
2  
3  
4  
5  
6  
7  
8  
9  
10  
11  
12  
13  
14  
15  
16  
17  
18  
19  
20  
21  
22  
23  
24  
25  
26  
27  
28  
29  
30  
31  
32  
33  
34  
35  
36  
37  
38  
39  
40  
41  
42  
43  
44  
45  
46  
47  
48  
49  
50  
51  
52  
53  
54  
55  
56  
57  
58  
59  
60

| Time: 4pm – 7pm<br>Late afternoon / early evening |                                                              | Time: 4pm – 7pm                                                                                                     |                                                   | Were you alone or with somebody you know?<br>Mark all relevant boxes |                          |                          |                          |                          |                          |                          | How much did you enjoy this time?<br>1 = not at all<br>7 = very much |  |
|---------------------------------------------------|--------------------------------------------------------------|---------------------------------------------------------------------------------------------------------------------|---------------------------------------------------|----------------------------------------------------------------------|--------------------------|--------------------------|--------------------------|--------------------------|--------------------------|--------------------------|----------------------------------------------------------------------|--|
| Time:<br>4pm–7pm<br>Afternoon / evening (pm)      | What were you doing?<br>Please write down one main activity. | Did you use a smartphone, tablet, or computer?<br>If you did something else at the same time, what else did you do? | Where were you?<br>Location, or mode of transport | Alone                                                                | Spouse / partner         | Mother                   | Father                   | Child aged 0-7           | Other person             | Others you know          |                                                                      |  |
| 4pm-4.10                                          |                                                              | <input type="checkbox"/>                                                                                            |                                                   | <input type="checkbox"/>                                             | <input type="checkbox"/> | <input type="checkbox"/> | <input type="checkbox"/> | <input type="checkbox"/> | <input type="checkbox"/> | <input type="checkbox"/> |                                                                      |  |
| 4.10-4.20                                         |                                                              | <input type="checkbox"/>                                                                                            |                                                   | <input type="checkbox"/>                                             | <input type="checkbox"/> | <input type="checkbox"/> | <input type="checkbox"/> | <input type="checkbox"/> | <input type="checkbox"/> | <input type="checkbox"/> |                                                                      |  |
| 4.20-4.30                                         |                                                              | <input type="checkbox"/>                                                                                            |                                                   | <input type="checkbox"/>                                             | <input type="checkbox"/> | <input type="checkbox"/> | <input type="checkbox"/> | <input type="checkbox"/> | <input type="checkbox"/> | <input type="checkbox"/> |                                                                      |  |
| 4.30-4.40                                         |                                                              | <input type="checkbox"/>                                                                                            |                                                   | <input type="checkbox"/>                                             | <input type="checkbox"/> | <input type="checkbox"/> | <input type="checkbox"/> | <input type="checkbox"/> | <input type="checkbox"/> | <input type="checkbox"/> |                                                                      |  |
| 4.40-4.50                                         |                                                              | <input type="checkbox"/>                                                                                            |                                                   | <input type="checkbox"/>                                             | <input type="checkbox"/> | <input type="checkbox"/> | <input type="checkbox"/> | <input type="checkbox"/> | <input type="checkbox"/> | <input type="checkbox"/> |                                                                      |  |
| 4.50-5pm                                          |                                                              | <input type="checkbox"/>                                                                                            |                                                   | <input type="checkbox"/>                                             | <input type="checkbox"/> | <input type="checkbox"/> | <input type="checkbox"/> | <input type="checkbox"/> | <input type="checkbox"/> | <input type="checkbox"/> |                                                                      |  |
| 5pm-5.10                                          |                                                              | <input type="checkbox"/>                                                                                            |                                                   | <input type="checkbox"/>                                             | <input type="checkbox"/> | <input type="checkbox"/> | <input type="checkbox"/> | <input type="checkbox"/> | <input type="checkbox"/> | <input type="checkbox"/> |                                                                      |  |
| 5.10-5.20                                         |                                                              | <input type="checkbox"/>                                                                                            |                                                   | <input type="checkbox"/>                                             | <input type="checkbox"/> | <input type="checkbox"/> | <input type="checkbox"/> | <input type="checkbox"/> | <input type="checkbox"/> | <input type="checkbox"/> |                                                                      |  |
| 5.20-5.30                                         |                                                              | <input type="checkbox"/>                                                                                            |                                                   | <input type="checkbox"/>                                             | <input type="checkbox"/> | <input type="checkbox"/> | <input type="checkbox"/> | <input type="checkbox"/> | <input type="checkbox"/> | <input type="checkbox"/> |                                                                      |  |
| 5.30-5.40                                         |                                                              | <input type="checkbox"/>                                                                                            |                                                   | <input type="checkbox"/>                                             | <input type="checkbox"/> | <input type="checkbox"/> | <input type="checkbox"/> | <input type="checkbox"/> | <input type="checkbox"/> | <input type="checkbox"/> |                                                                      |  |
| 5.40-5.50                                         |                                                              | <input type="checkbox"/>                                                                                            |                                                   | <input type="checkbox"/>                                             | <input type="checkbox"/> | <input type="checkbox"/> | <input type="checkbox"/> | <input type="checkbox"/> | <input type="checkbox"/> | <input type="checkbox"/> |                                                                      |  |
| 5.50-6pm                                          |                                                              | <input type="checkbox"/>                                                                                            |                                                   | <input type="checkbox"/>                                             | <input type="checkbox"/> | <input type="checkbox"/> | <input type="checkbox"/> | <input type="checkbox"/> | <input type="checkbox"/> | <input type="checkbox"/> |                                                                      |  |
| 6pm-6.10                                          |                                                              | <input type="checkbox"/>                                                                                            |                                                   | <input type="checkbox"/>                                             | <input type="checkbox"/> | <input type="checkbox"/> | <input type="checkbox"/> | <input type="checkbox"/> | <input type="checkbox"/> | <input type="checkbox"/> |                                                                      |  |
| 6.10-6.20                                         |                                                              | <input type="checkbox"/>                                                                                            |                                                   | <input type="checkbox"/>                                             | <input type="checkbox"/> | <input type="checkbox"/> | <input type="checkbox"/> | <input type="checkbox"/> | <input type="checkbox"/> | <input type="checkbox"/> |                                                                      |  |
| 6.20-6.30                                         |                                                              | <input type="checkbox"/>                                                                                            |                                                   | <input type="checkbox"/>                                             | <input type="checkbox"/> | <input type="checkbox"/> | <input type="checkbox"/> | <input type="checkbox"/> | <input type="checkbox"/> | <input type="checkbox"/> |                                                                      |  |
| 6.30-6.40                                         |                                                              | <input type="checkbox"/>                                                                                            |                                                   | <input type="checkbox"/>                                             | <input type="checkbox"/> | <input type="checkbox"/> | <input type="checkbox"/> | <input type="checkbox"/> | <input type="checkbox"/> | <input type="checkbox"/> |                                                                      |  |
| 6.40-6.50                                         |                                                              | <input type="checkbox"/>                                                                                            |                                                   | <input type="checkbox"/>                                             | <input type="checkbox"/> | <input type="checkbox"/> | <input type="checkbox"/> | <input type="checkbox"/> | <input type="checkbox"/> | <input type="checkbox"/> |                                                                      |  |
| 6.50-7pm                                          |                                                              | <input type="checkbox"/>                                                                                            |                                                   | <input type="checkbox"/>                                             | <input type="checkbox"/> | <input type="checkbox"/> | <input type="checkbox"/> | <input type="checkbox"/> | <input type="checkbox"/> | <input type="checkbox"/> |                                                                      |  |

1  
2  
3  
4  
5  
6  
7  
8  
9  
10  
11  
12  
13  
14  
15  
16  
17  
18  
19  
20  
21  
22  
23  
24  
25  
26  
27  
28  
29  
30  
31  
32  
33  
34  
35  
36  
37  
38  
39  
40  
41  
42  
43  
44  
45  
46  
47  
48  
49  
50  
51  
52  
53  
54  
55  
56  
57  
58  
59  
60

| Time: 7pm – 10pm Evening          |                                                              | Time: 7pm – 10pm                               |                                                   | Were you alone or with somebody you know?<br>Mark all relevant boxes |                          |                          |                          |                          |                          |                          |                          |                          |                          | How much did you enjoy this time?<br>1 =not at all<br>7 =very much |                          |                          |                          |                          |                          |                          |                          |                          |                          |                          |
|-----------------------------------|--------------------------------------------------------------|------------------------------------------------|---------------------------------------------------|----------------------------------------------------------------------|--------------------------|--------------------------|--------------------------|--------------------------|--------------------------|--------------------------|--------------------------|--------------------------|--------------------------|--------------------------------------------------------------------|--------------------------|--------------------------|--------------------------|--------------------------|--------------------------|--------------------------|--------------------------|--------------------------|--------------------------|--------------------------|
|                                   |                                                              |                                                |                                                   | People who live with you                                             |                          |                          |                          |                          |                          | Others you know          |                          |                          |                          |                                                                    |                          |                          |                          |                          |                          |                          |                          |                          |                          |                          |
| Time:<br>7pm-10pm<br>Evening (pm) | What were you doing?<br>Please write down one main activity. | Did you use a smartphone, tablet, or computer? | Where were you?<br>Location, or mode of transport | Spouse / partner                                                     | Mother                   | Father                   | Child aged 0-7           | Other person             | Other                    | Know                     | Alone                    |                          |                          |                                                                    |                          |                          |                          |                          |                          |                          |                          |                          |                          |                          |
| 7pm-7.10                          |                                                              | <input type="checkbox"/>                       |                                                   | <input type="checkbox"/>                                             | <input type="checkbox"/> | <input type="checkbox"/> | <input type="checkbox"/> | <input type="checkbox"/> | <input type="checkbox"/> | <input type="checkbox"/> | <input type="checkbox"/> | <input type="checkbox"/> | <input type="checkbox"/> | <input type="checkbox"/>                                           | <input type="checkbox"/> | <input type="checkbox"/> | <input type="checkbox"/> | <input type="checkbox"/> | <input type="checkbox"/> | <input type="checkbox"/> | <input type="checkbox"/> | <input type="checkbox"/> | <input type="checkbox"/> | <input type="checkbox"/> |
| 7.10-7.20                         |                                                              | <input type="checkbox"/>                       |                                                   | <input type="checkbox"/>                                             | <input type="checkbox"/> | <input type="checkbox"/> | <input type="checkbox"/> | <input type="checkbox"/> | <input type="checkbox"/> | <input type="checkbox"/> | <input type="checkbox"/> | <input type="checkbox"/> | <input type="checkbox"/> | <input type="checkbox"/>                                           | <input type="checkbox"/> | <input type="checkbox"/> | <input type="checkbox"/> | <input type="checkbox"/> | <input type="checkbox"/> | <input type="checkbox"/> | <input type="checkbox"/> | <input type="checkbox"/> | <input type="checkbox"/> | <input type="checkbox"/> |
| 7.20-7.30                         |                                                              | <input type="checkbox"/>                       |                                                   | <input type="checkbox"/>                                             | <input type="checkbox"/> | <input type="checkbox"/> | <input type="checkbox"/> | <input type="checkbox"/> | <input type="checkbox"/> | <input type="checkbox"/> | <input type="checkbox"/> | <input type="checkbox"/> | <input type="checkbox"/> | <input type="checkbox"/>                                           | <input type="checkbox"/> | <input type="checkbox"/> | <input type="checkbox"/> | <input type="checkbox"/> | <input type="checkbox"/> | <input type="checkbox"/> | <input type="checkbox"/> | <input type="checkbox"/> | <input type="checkbox"/> | <input type="checkbox"/> |
| 7.30-7.40                         |                                                              | <input type="checkbox"/>                       |                                                   | <input type="checkbox"/>                                             | <input type="checkbox"/> | <input type="checkbox"/> | <input type="checkbox"/> | <input type="checkbox"/> | <input type="checkbox"/> | <input type="checkbox"/> | <input type="checkbox"/> | <input type="checkbox"/> | <input type="checkbox"/> | <input type="checkbox"/>                                           | <input type="checkbox"/> | <input type="checkbox"/> | <input type="checkbox"/> | <input type="checkbox"/> | <input type="checkbox"/> | <input type="checkbox"/> | <input type="checkbox"/> | <input type="checkbox"/> | <input type="checkbox"/> | <input type="checkbox"/> |
| 7.40-7.50                         |                                                              | <input type="checkbox"/>                       |                                                   | <input type="checkbox"/>                                             | <input type="checkbox"/> | <input type="checkbox"/> | <input type="checkbox"/> | <input type="checkbox"/> | <input type="checkbox"/> | <input type="checkbox"/> | <input type="checkbox"/> | <input type="checkbox"/> | <input type="checkbox"/> | <input type="checkbox"/>                                           | <input type="checkbox"/> | <input type="checkbox"/> | <input type="checkbox"/> | <input type="checkbox"/> | <input type="checkbox"/> | <input type="checkbox"/> | <input type="checkbox"/> | <input type="checkbox"/> | <input type="checkbox"/> | <input type="checkbox"/> |
| 7.50-8pm                          |                                                              | <input type="checkbox"/>                       |                                                   | <input type="checkbox"/>                                             | <input type="checkbox"/> | <input type="checkbox"/> | <input type="checkbox"/> | <input type="checkbox"/> | <input type="checkbox"/> | <input type="checkbox"/> | <input type="checkbox"/> | <input type="checkbox"/> | <input type="checkbox"/> | <input type="checkbox"/>                                           | <input type="checkbox"/> | <input type="checkbox"/> | <input type="checkbox"/> | <input type="checkbox"/> | <input type="checkbox"/> | <input type="checkbox"/> | <input type="checkbox"/> | <input type="checkbox"/> | <input type="checkbox"/> | <input type="checkbox"/> |
| 8pm-8.10                          |                                                              | <input type="checkbox"/>                       |                                                   | <input type="checkbox"/>                                             | <input type="checkbox"/> | <input type="checkbox"/> | <input type="checkbox"/> | <input type="checkbox"/> | <input type="checkbox"/> | <input type="checkbox"/> | <input type="checkbox"/> | <input type="checkbox"/> | <input type="checkbox"/> | <input type="checkbox"/>                                           | <input type="checkbox"/> | <input type="checkbox"/> | <input type="checkbox"/> | <input type="checkbox"/> | <input type="checkbox"/> | <input type="checkbox"/> | <input type="checkbox"/> | <input type="checkbox"/> | <input type="checkbox"/> | <input type="checkbox"/> |
| 8.10-8.20                         |                                                              | <input type="checkbox"/>                       |                                                   | <input type="checkbox"/>                                             | <input type="checkbox"/> | <input type="checkbox"/> | <input type="checkbox"/> | <input type="checkbox"/> | <input type="checkbox"/> | <input type="checkbox"/> | <input type="checkbox"/> | <input type="checkbox"/> | <input type="checkbox"/> | <input type="checkbox"/>                                           | <input type="checkbox"/> | <input type="checkbox"/> | <input type="checkbox"/> | <input type="checkbox"/> | <input type="checkbox"/> | <input type="checkbox"/> | <input type="checkbox"/> | <input type="checkbox"/> | <input type="checkbox"/> | <input type="checkbox"/> |
| 8.20-8.30                         |                                                              | <input type="checkbox"/>                       |                                                   | <input type="checkbox"/>                                             | <input type="checkbox"/> | <input type="checkbox"/> | <input type="checkbox"/> | <input type="checkbox"/> | <input type="checkbox"/> | <input type="checkbox"/> | <input type="checkbox"/> | <input type="checkbox"/> | <input type="checkbox"/> | <input type="checkbox"/>                                           | <input type="checkbox"/> | <input type="checkbox"/> | <input type="checkbox"/> | <input type="checkbox"/> | <input type="checkbox"/> | <input type="checkbox"/> | <input type="checkbox"/> | <input type="checkbox"/> | <input type="checkbox"/> | <input type="checkbox"/> |
| 8.30-8.40                         |                                                              | <input type="checkbox"/>                       |                                                   | <input type="checkbox"/>                                             | <input type="checkbox"/> | <input type="checkbox"/> | <input type="checkbox"/> | <input type="checkbox"/> | <input type="checkbox"/> | <input type="checkbox"/> | <input type="checkbox"/> | <input type="checkbox"/> | <input type="checkbox"/> | <input type="checkbox"/>                                           | <input type="checkbox"/> | <input type="checkbox"/> | <input type="checkbox"/> | <input type="checkbox"/> | <input type="checkbox"/> | <input type="checkbox"/> | <input type="checkbox"/> | <input type="checkbox"/> | <input type="checkbox"/> | <input type="checkbox"/> |
| 8.40-8.50                         |                                                              | <input type="checkbox"/>                       |                                                   | <input type="checkbox"/>                                             | <input type="checkbox"/> | <input type="checkbox"/> | <input type="checkbox"/> | <input type="checkbox"/> | <input type="checkbox"/> | <input type="checkbox"/> | <input type="checkbox"/> | <input type="checkbox"/> | <input type="checkbox"/> | <input type="checkbox"/>                                           | <input type="checkbox"/> | <input type="checkbox"/> | <input type="checkbox"/> | <input type="checkbox"/> | <input type="checkbox"/> | <input type="checkbox"/> | <input type="checkbox"/> | <input type="checkbox"/> | <input type="checkbox"/> | <input type="checkbox"/> |
| 8.50-9pm                          |                                                              | <input type="checkbox"/>                       |                                                   | <input type="checkbox"/>                                             | <input type="checkbox"/> | <input type="checkbox"/> | <input type="checkbox"/> | <input type="checkbox"/> | <input type="checkbox"/> | <input type="checkbox"/> | <input type="checkbox"/> | <input type="checkbox"/> | <input type="checkbox"/> | <input type="checkbox"/>                                           | <input type="checkbox"/> | <input type="checkbox"/> | <input type="checkbox"/> | <input type="checkbox"/> | <input type="checkbox"/> | <input type="checkbox"/> | <input type="checkbox"/> | <input type="checkbox"/> | <input type="checkbox"/> | <input type="checkbox"/> |
| 9pm-9.10                          |                                                              | <input type="checkbox"/>                       |                                                   | <input type="checkbox"/>                                             | <input type="checkbox"/> | <input type="checkbox"/> | <input type="checkbox"/> | <input type="checkbox"/> | <input type="checkbox"/> | <input type="checkbox"/> | <input type="checkbox"/> | <input type="checkbox"/> | <input type="checkbox"/> | <input type="checkbox"/>                                           | <input type="checkbox"/> | <input type="checkbox"/> | <input type="checkbox"/> | <input type="checkbox"/> | <input type="checkbox"/> | <input type="checkbox"/> | <input type="checkbox"/> | <input type="checkbox"/> | <input type="checkbox"/> | <input type="checkbox"/> |
| 9.10-9.20                         |                                                              | <input type="checkbox"/>                       |                                                   | <input type="checkbox"/>                                             | <input type="checkbox"/> | <input type="checkbox"/> | <input type="checkbox"/> | <input type="checkbox"/> | <input type="checkbox"/> | <input type="checkbox"/> | <input type="checkbox"/> | <input type="checkbox"/> | <input type="checkbox"/> | <input type="checkbox"/>                                           | <input type="checkbox"/> | <input type="checkbox"/> | <input type="checkbox"/> | <input type="checkbox"/> | <input type="checkbox"/> | <input type="checkbox"/> | <input type="checkbox"/> | <input type="checkbox"/> | <input type="checkbox"/> | <input type="checkbox"/> |
| 9.20-9.30                         |                                                              | <input type="checkbox"/>                       |                                                   | <input type="checkbox"/>                                             | <input type="checkbox"/> | <input type="checkbox"/> | <input type="checkbox"/> | <input type="checkbox"/> | <input type="checkbox"/> | <input type="checkbox"/> | <input type="checkbox"/> | <input type="checkbox"/> | <input type="checkbox"/> | <input type="checkbox"/>                                           | <input type="checkbox"/> | <input type="checkbox"/> | <input type="checkbox"/> | <input type="checkbox"/> | <input type="checkbox"/> | <input type="checkbox"/> | <input type="checkbox"/> | <input type="checkbox"/> | <input type="checkbox"/> | <input type="checkbox"/> |
| 9.30-9.40                         |                                                              | <input type="checkbox"/>                       |                                                   | <input type="checkbox"/>                                             | <input type="checkbox"/> | <input type="checkbox"/> | <input type="checkbox"/> | <input type="checkbox"/> | <input type="checkbox"/> | <input type="checkbox"/> | <input type="checkbox"/> | <input type="checkbox"/> | <input type="checkbox"/> | <input type="checkbox"/>                                           | <input type="checkbox"/> | <input type="checkbox"/> | <input type="checkbox"/> | <input type="checkbox"/> | <input type="checkbox"/> | <input type="checkbox"/> | <input type="checkbox"/> | <input type="checkbox"/> | <input type="checkbox"/> | <input type="checkbox"/> |
| 9.40-9.50                         |                                                              | <input type="checkbox"/>                       |                                                   | <input type="checkbox"/>                                             | <input type="checkbox"/> | <input type="checkbox"/> | <input type="checkbox"/> | <input type="checkbox"/> | <input type="checkbox"/> | <input type="checkbox"/> | <input type="checkbox"/> | <input type="checkbox"/> | <input type="checkbox"/> | <input type="checkbox"/>                                           | <input type="checkbox"/> | <input type="checkbox"/> | <input type="checkbox"/> | <input type="checkbox"/> | <input type="checkbox"/> | <input type="checkbox"/> | <input type="checkbox"/> | <input type="checkbox"/> | <input type="checkbox"/> | <input type="checkbox"/> |
| 9.50-10pm                         |                                                              | <input type="checkbox"/>                       |                                                   | <input type="checkbox"/>                                             | <input type="checkbox"/> | <input type="checkbox"/> | <input type="checkbox"/> | <input type="checkbox"/> | <input type="checkbox"/> | <input type="checkbox"/> | <input type="checkbox"/> | <input type="checkbox"/> | <input type="checkbox"/> | <input type="checkbox"/>                                           | <input type="checkbox"/> | <input type="checkbox"/> | <input type="checkbox"/> | <input type="checkbox"/> | <input type="checkbox"/> | <input type="checkbox"/> | <input type="checkbox"/> | <input type="checkbox"/> | <input type="checkbox"/> | <input type="checkbox"/> |

1  
2  
3  
4  
5  
6  
7  
8  
9  
10  
11  
12  
13  
14  
15  
16  
17  
18  
19  
20  
21  
22  
23  
24  
25  
26  
27  
28  
29  
30  
31  
32  
33  
34  
35  
36  
37  
38  
39  
40  
41  
42  
43  
44  
45  
46  
47  
48  
49  
50  
51  
52  
53  
54  
55  
56  
57  
58  
59  
60

| Time: 10pm – 1am<br>Night |  | Time: 10pm – 1am                                             |                                                                                                                     | Were you alone or with somebody you know?<br>Mark all relevant boxes |                          |                          |                          |                          |                          |                          | How much did you enjoy this time?<br>1 = not at all<br>7 = very much |                 |
|---------------------------|--|--------------------------------------------------------------|---------------------------------------------------------------------------------------------------------------------|----------------------------------------------------------------------|--------------------------|--------------------------|--------------------------|--------------------------|--------------------------|--------------------------|----------------------------------------------------------------------|-----------------|
|                           |  | What were you doing?<br>Please write down one main activity. | Did you use a smartphone, tablet, or computer?<br>If you did something else at the same time, what else did you do? | Where were you?<br>Location, or mode of transport                    | Alone                    | Spouse / partner         | Mother                   | Father                   | Child aged 0-7           | Other person             |                                                                      | Others you know |
| 10pm-10.10                |  | <input type="checkbox"/>                                     |                                                                                                                     |                                                                      | <input type="checkbox"/>                                             |                 |
| 10.10-10.20               |  | <input type="checkbox"/>                                     |                                                                                                                     |                                                                      | <input type="checkbox"/>                                             |                 |
| 10.20-10.30               |  | <input type="checkbox"/>                                     |                                                                                                                     |                                                                      | <input type="checkbox"/>                                             |                 |
| 10.30-10.40               |  | <input type="checkbox"/>                                     |                                                                                                                     |                                                                      | <input type="checkbox"/>                                             |                 |
| 10.40-10.50               |  | <input type="checkbox"/>                                     |                                                                                                                     |                                                                      | <input type="checkbox"/>                                             |                 |
| 10.50-11pm                |  | <input type="checkbox"/>                                     |                                                                                                                     |                                                                      | <input type="checkbox"/>                                             |                 |
| 11pm-11.10                |  | <input type="checkbox"/>                                     |                                                                                                                     |                                                                      | <input type="checkbox"/>                                             |                 |
| 11.10-11.20               |  | <input type="checkbox"/>                                     |                                                                                                                     |                                                                      | <input type="checkbox"/>                                             |                 |
| 11.20-11.30               |  | <input type="checkbox"/>                                     |                                                                                                                     |                                                                      | <input type="checkbox"/>                                             |                 |
| 11.30-11.40               |  | <input type="checkbox"/>                                     |                                                                                                                     |                                                                      | <input type="checkbox"/>                                             |                 |
| 11.40-11.50               |  | <input type="checkbox"/>                                     |                                                                                                                     |                                                                      | <input type="checkbox"/>                                             |                 |
| 11.50-12am                |  | <input type="checkbox"/>                                     |                                                                                                                     |                                                                      | <input type="checkbox"/>                                             |                 |
| 12am-12.10                |  | <input type="checkbox"/>                                     |                                                                                                                     |                                                                      | <input type="checkbox"/>                                             |                 |
| 12.10-12.20               |  | <input type="checkbox"/>                                     |                                                                                                                     |                                                                      | <input type="checkbox"/>                                             |                 |
| 12.20-12.30               |  | <input type="checkbox"/>                                     |                                                                                                                     |                                                                      | <input type="checkbox"/>                                             |                 |
| 12.30-12.40               |  | <input type="checkbox"/>                                     |                                                                                                                     |                                                                      | <input type="checkbox"/>                                             |                 |
| 12.40-12.50               |  | <input type="checkbox"/>                                     |                                                                                                                     |                                                                      | <input type="checkbox"/>                                             |                 |
| 12.50-1am                 |  | <input type="checkbox"/>                                     |                                                                                                                     |                                                                      | <input type="checkbox"/>                                             |                 |





## Diary Checklist

Please go through the diary again and check the following:

1. When did you fill in the diary ?
  1. Now and then during the diary day
  2. At the end of the diary day
  3. The day after the diary day
  
2. Did you feel rushed this day?
  1. Yes
  2. No
  
3. Was this an ordinary or an unusual day?
  1. An ordinary day
  2. An unusual day
  
4. What kind of day was this day?
  1. A workday
  2. A school or college day
  3. A day off
  4. A sick leave day
  5. An annual leave day
  6. On leave for other reasons
  7. None of the above

- Please check that you have noted only one main activity on each line and that there are no empty time periods.
- Have you marked clearly your employment working hours, even if you worked at home?
- Have you recorded all travel and modes of transport?
- Have you marked the duration of secondary activities, if any?
- Please check that you have always completed the 'Were you alone or with somebody you know' column.

---

## Information Booklet for Participants

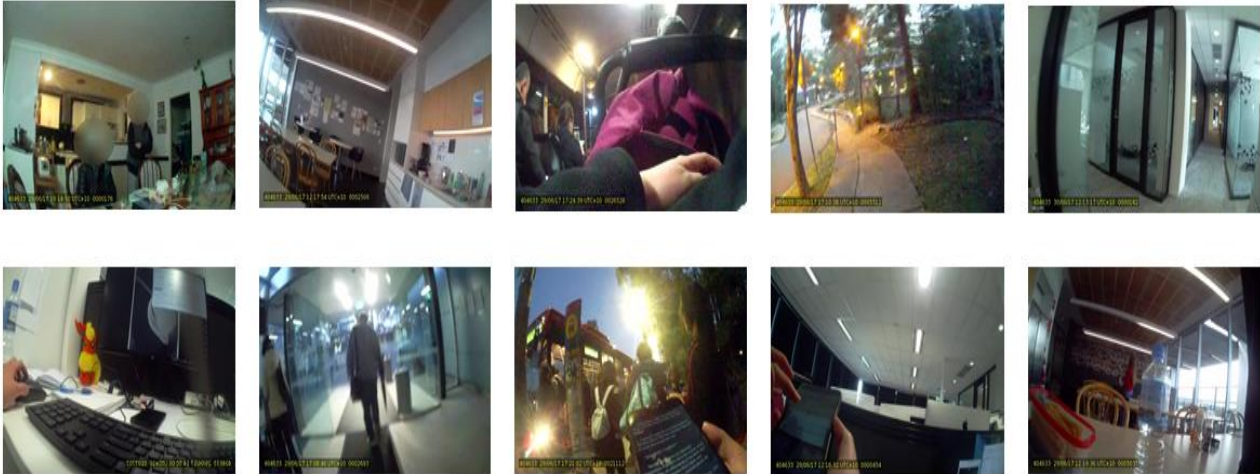

If you have any questions about the study, please contact

Dr Annie Lau

[annie.lau@mq.edu.au](mailto:annie.lau@mq.edu.au)

Telephone: (02) 9850 2436

Dr Kathleen Yin

[kathleen.yin@mq.edu.au](mailto:kathleen.yin@mq.edu.au)

Telephone: (02) 9850 2477

## Information for participants

1  
2  
3  
4  
5 Recently we invited you to take part in a research project investigating the amount of  
6 'patient work' you conduct for Type 2 diabetes and other chronic health conditions. This  
7 information booklet is designed to fully inform you about the project before you agree to  
8 participate.  
9  
10

### ***About the study***

11  
12  
13  
14  
15 Living with a health condition does not come naturally. Following a diagnosis or medical  
16 interventions, patients and their families must undertake extra work to accommodate their  
17 health condition, such as making time to administer medications, visit medical  
18 professionals, or prepare meals.  
19  
20

21  
22 The concept of 'patient work' describes these health-related tasks the patient must  
23 somehow integrate into their daily routine. When integrated poorly, these tasks have the  
24 potential to generate extra stress, contributing to non-compliance, and negatively affecting  
25 the health outcomes of the patient.  
26  
27

28  
29 Type 2 diabetes is known to require significant amounts of patient work on a daily basis,  
30 and for patients who also have other health conditions, the amount of patient work can  
31 increase exponentially.  
32  
33

34  
35 The aim of this study is to observe and document how patient work impacts individuals  
36 with type 2 diabetes and at least one other chronic comorbidity. The goal is gain a better  
37 understanding of the daily routines of those affected by type 2 diabetes and other health  
38 conditions, so that we can understand how to integrate healthcare interventions more  
39 seamlessly into our daily lives in order to improve health outcomes.  
40  
41

### ***Do I have to take part?***

42  
43  
44 You are free to decide whether or not to take part in this study. If you agree, we will ask  
45 you to sign an informed consent form. If you agree and then later decide not to take part,  
46 you can leave the study at any time by advising the researchers of your decision. There will  
47 be no penalty to you for leaving the study at any time.  
48  
49  
50  
51  
52  
53  
54  
55  
56  
57  
58  
59  
60

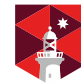

## ***Who can participate?***

Participants are required to be consenting adults who:

- are able to speak, write and read in English;
- are aged 18 years and older;
- are diagnosed with type 2 diabetes and at least one more chronic health condition;
- are willing to fill in a time-use diary for one day; and
- agree to wear the Edesix body camera on their person for one day.

Exclusion criteria include:

- pregnancy;
- critical illness;
- end-stage disease;
- dementia;
- severe mental disorders that prevent participants from giving consent; or
- needing assistance with basic daily living such as reading, writing, dressing and eating.

## ***What would I have to do?***

If you decide to participate, we will ask you to complete three tasks:

- First, we will ask you to attend a pre-study session at Macquarie University, or a place of your choice (e.g. your home), where you will be given information about the study, provide written consent if you are willing to participate, and complete two questionnaires about your personal information and your health (approximately 5-10 minutes each). (Note: you can do these questionnaires in your own time).

Afterwards, we will ask you to tell us about your health and the activities you do for your health (approximately 1 hour). This interview will be audio recorded for future analysis. You can terminate the interview at any point.

With your permission, we will take photos of your surroundings and the tools you use to manage your health (e.g. medications, devices, home environment), where information identifying you (e.g. names on prescription label) will be masked.

- Next, we will give you two pieces of equipment to collect data about your day (body camera and Time-Use Diary).

We will ask you to fill out a Time-Use Diary for 24 hours, and wear an Edesix body camera during the waking hours of the same day (approximately 8-14 hours).

You are free to remove the camera at any time. Particularly, we recommend you to turn off the camera when anyone (including yourself) is dressing or undressing, using the bathroom or showers, during any situations where privacy is of concern, or any other time that you or others might feel uncomfortable.

If you are in the company of others (e.g. household members, friends and/or acquaintances), we ask you to seek permission from these third parties prior to video recording.

- Soon after data collection, you will be asked to visit the study centre at Macquarie University to return the diary and the data gathering tools, as well as for a post-study reconstruction interview. If you prefer to not travel, the research team will endeavour to visit you at your home (or your preferred location). This session will take approximately 1 hour.

The videos from the body camera will be downloaded onto a secure computer and you will be invited to view them alone. You may delete any or all of them without giving any reason. The researcher will not view any of the videos until you have done this.

We will ask you to look through the videos with us and tell us about your daily activities, especially health-related tasks. This interview will take approximately 30-40 minutes. We will also ask you to fill in a questionnaire about your experiences of wearing the camera and completing the Diary (approximately 10 minutes).



### ***What will happen to the information I provide?***

Your confidentiality will be respected at all times. All your data, including the videos will be stored on a password-protected computer. You will never be identified or have your image shown without your written permission. The results from this research project will be submitted for publication in academic journals and used to inform researchers on future work. Researchers outside this project may request to analyse your anonymised data, but will be required to follow the same highest standards of research integrity and ethics expected of Macquarie University researchers.

## ***Who will conduct the study?***

There are four researchers from Macquarie University conducting this study, who are available to answer any questions or concerns you may have:

- Macquarie University
  - Dr Annie Lau ([annie.lau@mq.edu.au](mailto:annie.lau@mq.edu.au) 02 9850 2436)
  - Dr Kathleen Yin ([kathleen.yin@mq.edu.au](mailto:kathleen.yin@mq.edu.au) 02 9850 2477)
  - Dr Liliana Laranjo ([liliana.laranjo@mq.edu.au](mailto:liliana.laranjo@mq.edu.au) 02 9850 2426)
  - Prof Enrico Coiera ([enrico.coiera@mq.edu.au](mailto:enrico.coiera@mq.edu.au) 02 9850 2403)
  - A/Prof Kenneth Ho
  - Mr Wen Jun Liang (Bachelor of Engineering)
  - Mr Joshua Haddrill (Bachelor of Engineering)
  - Ms Isabelle Barnes (Bachelor of Clinical Science)
  - Mr Joshua Jung (Bachelor of Clinical Science)
  - Mr Christian Tran (Bachelor of Commerce and Arts (Psychology))
  - Mr Jiawei He (Bachelor of Commerce and Arts (Psychology))
- MQ Health General Practice
  - Dr Sanjyot Vagholkar
- University of Oxford
  - Dr Teresa Harms
  - Prof Jonathan Gershuny

## ***What are the possible benefits of taking part in this study?***

You will receive a \$60 shopping voucher as remuneration for participating in the study.



## ***What are the possible disadvantages in taking part in the study?***

We do not anticipate that participating in this project will have any significant effects on your lifestyle. If you do not want to answer any of the questions in the questionnaires or interview, you do not have to. You will also be able to check and delete any videos taken prior to the researchers viewing the videos.

It is possible that while wearing the camera you may be asked about the device by members of the public. In this case we suggest that you say the following:

*“I am volunteering for a research project. The device is a wearable camera and the images will be used to record my daily activities. I am happy to remove it if you would like me to.”*

We will provide you with a wallet-size card that includes this statement and contact information for you to show others if you wish.

Please remember to always prioritise your own personal safety and comfort above the study's requirements.

## ***What happens next?***

If you decide that you do not want to take part in the study, we thank you for taking the time to consider it.

## ***What if there is a problem?***

Approval to conduct this research has been provided by Macquarie University, in accordance with its ethics review and approval procedures. Any person considering participation in this research project, or agreeing to participate, may raise any questions or issues with the researchers at any time. In addition, any person not satisfied with the response of researchers may raise ethics issues or concerns, and may make any complaints about this research project by contacting the Human Research Ethics Committee at Macquarie University on (02) 9850 7854 or by emailing to [ethics@mq.edu.au](mailto:ethics@mq.edu.au).

All research participants are entitled to retain a copy of any Participant Information Form and/or Participant Consent Form relating to this research project.

If you have a concern about any aspect of this project, please speak to a member of the research team: Annie Lau ([annie.lau@mq.edu.au](mailto:annie.lau@mq.edu.au) 02 9850 2436) or Kathleen Yin ([kathleen.yin@mq.edu.au](mailto:kathleen.yin@mq.edu.au) 02 9850 2477).

1  
2  
3  
4  
5  
6  
7  
8  
9  
10  
11  
12  
13  
14  
15  
16  
17  
18  
19  
20  
21  
22  
23  
24  
25  
26  
27  
28  
29  
30  
31  
32  
33  
34  
35  
36  
37  
38  
39  
40  
41  
42  
43  
44  
45  
46  
47  
48  
49  
50  
51  
52  
53  
54  
55  
56  
57  
58  
59  
60

**Participant Information Questionnaire**

**Date:** \_\_\_\_\_

**\*Email:** \_\_\_\_\_

**Date of Birth:** \_\_\_\_\_ **Sex** : \_\_\_\_\_

**Health conditions:** \_\_\_\_\_

**List of medications being taken:** \_\_\_\_\_

**Length of time since diagnosis:** \_\_\_\_\_

For peer review only

1  
2  
3  
4  
5  
6  
7  
8  
9  
10  
11  
12  
13  
14  
15

### What is your employment status?

- 16  
17  
18  
19  
20  
21  
22  
23  
24  
25  
26  
27  
28  
29  
30  
31  
32  
33
- |                          |                                                                      |                          |                          |
|--------------------------|----------------------------------------------------------------------|--------------------------|--------------------------|
| <input type="checkbox"/> | In paid employment                                                   | <input type="checkbox"/> | Unpaid work experience   |
| <input type="checkbox"/> | Full-time student                                                    | <input type="checkbox"/> | Retired                  |
| <input type="checkbox"/> | Unemployed (not on leave)                                            | <input type="checkbox"/> | On parental leave        |
| <input type="checkbox"/> | Doing domestic work (homemaking,<br>looking after the children etc.) | <input type="checkbox"/> | Other (specify)<br>_____ |

### Would you like to be contacted to receive feedback on the study?

34  
35  
36  
37  
38  
39  
40  
41  
42  
43  
44  
45  
46  
47  
48  
49  
50  
51  
52  
53  
54  
55  
56  
57  
58  
59  
60

Yes  No

### Would you like to be contacted for future research?

Yes  No

**\*Please note, all of the information in this questionnaire, including contact information, will only be used for research purposes and will not be passed on to third parties.**

### The Multimorbidity Illness Perceptions Scale (MULTIPLEs)

These questions are about the thoughts and feelings that people with multiple long-term conditions sometimes experience. Please indicate how much you agree with each statement by circling one number.

Strongly Disagree  $\longrightarrow$  Strongly Agree

|    |                                                                                                |   |   |   |   |
|----|------------------------------------------------------------------------------------------------|---|---|---|---|
| 1  | One of my conditions is more serious than the others.                                          | 0 | 1 | 2 | 3 |
| 2  | Time spent managing my conditions has made it more difficult to carry out my usual activities. | 0 | 1 | 2 | 3 |
| 3  | I feel so overwhelmed by the treatment for one condition it is hard to manage any others.      | 0 | 1 | 2 | 3 |
| 4  | The causes of my conditions are linked.                                                        | 0 | 1 | 2 | 3 |
| 5  | It is difficult to take all my medications the way I am supposed to.                           | 0 | 1 | 2 | 3 |
| 6  | Time spent managing my condition has limited my activities.                                    | 0 | 1 | 2 | 3 |
| 7  | One of my conditions is more worrying than the others.                                         | 0 | 1 | 2 | 3 |
| 8  | Taking different medications for each of my conditions has caused me problems.                 | 0 | 1 | 2 | 3 |
| 9  | I don't like mixing medications for different conditions.                                      | 0 | 1 | 2 | 3 |
| 10 | Having more than one condition makes my treatments less effective.                             | 0 | 1 | 2 | 3 |
| 11 | One of my conditions has caused another.                                                       | 0 | 1 | 2 | 3 |
| 12 | One of my conditions dominates the others.                                                     | 0 | 1 | 2 | 3 |
| 13 | My conditions interact with each other.                                                        | 0 | 1 | 2 | 3 |
| 14 | Having more than one condition makes it difficult to get the best available treatment.         | 0 | 1 | 2 | 3 |
| 15 | Time spent managing my conditions has reduced my social life.                                  | 0 | 1 | 2 | 3 |
| 16 | One of my conditions has more of an impact on my life.                                         | 0 | 1 | 2 | 3 |

Strongly Disagree  $\longrightarrow$  Strongly Agree

|    |                                                                   |   |   |   |   |   |   |
|----|-------------------------------------------------------------------|---|---|---|---|---|---|
| 17 | Having more than one condition makes me unhappy.                  | 0 | 1 | 2 | 3 | 4 | 5 |
| 18 | Having more than one condition makes me more anxious.             | 0 | 1 | 2 | 3 | 4 | 5 |
| 19 | Having more than one condition makes me angry or frustrated.      | 0 | 1 | 2 | 3 | 4 | 5 |
| 20 | Having more than one health problem makes me feel sad.            | 0 | 1 | 2 | 3 | 4 | 5 |
| 21 | Having more than one condition makes me more irritable.           | 0 | 1 | 2 | 3 | 4 | 5 |
| 22 | If I feel sad or depressed, managing my conditions is a struggle. | 0 | 1 | 2 | 3 | 4 | 5 |



## PARTICIPANT EXPERIENCE SURVEY

### EDESIX BODY CAMERA

***Did you experience any of the following problems while you were wearing the camera?***

|                                                              | Never | Some-times | Often | Always |
|--------------------------------------------------------------|-------|------------|-------|--------|
| Forgetting to wear the camera                                |       |            |       |        |
| People’s reaction to me wearing the camera                   |       |            |       |        |
| Discomfort wearing the camera                                |       |            |       |        |
| Problems with the camera slipping/moving about               |       |            |       |        |
| Difficulty understanding the camera instructions             |       |            |       |        |
| Frustration with the length of time I had to wear the camera |       |            |       |        |
| Being uncertain about whether the camera was turned on       |       |            |       |        |

Do you have any additional comments about your experience of wearing the camera?

---



---



---



---



1  
2  
3  
4  
5  
6  
7  
8  
9  
10  
11  
12  
13  
14  
15  
16  
17  
18  
19  
20  
21  
22  
23  
24  
25  
26  
27  
28  
29  
30  
31  
32  
33  
34  
35  
36  
37  
38  
39  
40  
41  
42  
43  
44  
45  
46  
47

### TIME USE DIARY

| <i>Did you experience any of these problems when completing the diary?</i> |       |            |       |        |
|----------------------------------------------------------------------------|-------|------------|-------|--------|
|                                                                            | Never | Some-times | Often | Always |
| Remembering to fill in the diary                                           |       |            |       |        |
| Forgetting what I did during the day/evening                               |       |            |       |        |
| The length of time it took to complete the diary                           |       |            |       |        |
| Completing all sections of the diary                                       |       |            |       |        |
| Understanding the diary instructions                                       |       |            |       |        |

Do you have any additional comments about your experience of completing the time use diary?

---



---



---



---



1  
2 **PARTICIPATING IN THE STUDY**  
3

4 Were there any aspects of the study that you particularly enjoyed?  
5  
6 \_\_\_\_\_  
7 \_\_\_\_\_  
8 \_\_\_\_\_

9 Were there any aspects of the study that you disliked?  
10  
11 \_\_\_\_\_  
12 \_\_\_\_\_  
13 \_\_\_\_\_

14 How did you find the 'reconstruction interview' experience?  
15  
16 \_\_\_\_\_  
17 \_\_\_\_\_  
18 \_\_\_\_\_

19 What motivated you to participate in the study?  
20  
21 \_\_\_\_\_  
22 \_\_\_\_\_  
23 \_\_\_\_\_  
24 \_\_\_\_\_

25 Do you have any other comments or suggestions?  
26  
27 \_\_\_\_\_  
28 \_\_\_\_\_  
29 \_\_\_\_\_  
30 \_\_\_\_\_  
31 \_\_\_\_\_  
32 \_\_\_\_\_  
33 \_\_\_\_\_  
34 \_\_\_\_\_  
35 \_\_\_\_\_  
36 \_\_\_\_\_  
37 \_\_\_\_\_  
38 \_\_\_\_\_  
39 \_\_\_\_\_  
40 \_\_\_\_\_  
41 \_\_\_\_\_  
42 \_\_\_\_\_

1 Centre for Health Informatics  
2 Australian Institute of Health Innovation  
3 Faculty of Medicine and Health Sciences  
4 MACQUARIE UNIVERSITY NSW 2109  
5 Phone: +61 (2) 9850 2436  
6 Email: annie.lau@mq.edu.au  
7  
8



9 Chief Investigator's Name & Title: Dr Annie Lau  
10

## 11 **Participant Information and Consent Form**

### 13 **Name of Project**

14 Analysis of patient work conducted by patients with type 2 diabetes and multiple  
15 comorbidities.  
16  
17

### 18 **Project Information**

19 You are invited to participate in an observational study of the 'patient work'  
20 involved in self-managing type 2 diabetes and other conditions, using a  
21 combination of time-use diaries, a physical activity tracker, and a body camera.  
22

23 The purpose of the study is to investigate the extra health-related work you  
24 undertake to accommodate your health conditions, such as taking medications,  
25 preparing meals, or making time to see doctors. We want to gain a better  
26 understanding of the daily routines of those living with type 2 diabetes and  
27 other health conditions, so that we can understand how to integrate healthcare  
28 interventions more seamlessly into our daily lives in order to improve health  
29 outcomes.  
30  
31

32 The study is being conducted by Dr Annie Lau (Ph 02 9850 2436  
33 annie.lau@mq.edu.au), Dr Kathleen Yin (Ph 02 9850 2477  
34 kathleen.yin@mq.edu.au), Prof Enrico Coiera (Ph 02 9850 2403), Dr Liliana  
35 Laranjo (Ph 02 9850 2426), A/Prof Kenneth Ho, Mr Wen Jun Liang (Bachelor  
36 of Engineering), Mr Joshua Hadrill (Bachelor of Engineering), Ms Isabelle  
37 Barnes (Bachelor of Clinical Science), Mr Joshua Jung (Bachelor of Clinical  
38 Science), Mr Christian Tran (Bachelor of Commerce and Arts), and Mr Jiawei  
39 he (Bachelor of Commerce and Arts) from Macquarie University's Australian  
40 Institute of Health Innovation, Dr Sanjyot Vagholkar from MQ Health General  
41 Practice, and Dr Teresa Harms and Prof Jonathan Gershuny from the  
42 University of Oxford (UK).  
43  
44

45 You will be given a \$60 shopping voucher as our appreciation for taking part in  
46 this study.  
47  
48

49 Participants are required to be consenting adults who:

- 50 • are able to speak, write and read in English;
- 51 • are aged 18 years and older;
- 52 • are diagnosed with type 2 diabetes and at least one more chronic health  
53 condition;
- 54 • are willing to fill in a Time-Use Diary for one day; and
- 55 • agree to wear the Edesix body camera on their person for one day.  
56  
57  
58  
59  
60



If you decide to participate, you will be asked to complete three tasks:

- **Task 1 - Pre-study briefing session:** Attend a pre-study briefing session at Macquarie University, or a place of your choice (e.g. your home), where you will be given information about the study, asked to provide written consent if you are willing to participate, and complete two questionnaires about your personal information and your health (approximately 5-10 minutes each).

Afterwards, we will conduct an interview with you to better understand your health condition and existing patient work. This interview will be audio recorded for future analysis. You can terminate the interview at any point you want.

With your permission, we will take photos of your surroundings and the tools you use to manage your health (e.g. medications, devices, home environment).

Lastly, we will provide you with two pieces of equipment (Edesix camera and time-use diary), and show you how to use them for the second task of data collection. We will also provide you an explanation card where you can show it to members of the public who are enquiring about the study.

- **Task 2 - Data collection:** After the briefing session, you will be asked to wear the Edesix body camera during the waking hours of one (1) day, which will take video recordings of your daily activities for approximately 8 to 14 hours. No audio will be recorded.

We will also ask you to complete the time-use diary over the same day for 24 hours.

You have the right to remove the camera at any time.

(Please note: The Edesix body camera is encrypted to ensure your data is protected.

You are recommended to turn off the body camera during situations when anyone (including yourself) is dressing or undressing, using the bathroom or showers, or during any situations where privacy or recording is of concern.

Should you feel unsafe due to the presence of the body camera at any stage of the study, you should always prioritise your own personal safety and comfort above the study's requirements.)

- 1
- 2
- 3
- 4
- 5
- 6
- **Task 3 - Post-study debriefing session:** Immediately after the data collection day, we will ask you to attend a 1-hour post-study session at Macquarie University, or a place of your choice, where we will go through the videos together and conduct a debriefing session with you.

7

8

9

Please bring the two pieces of equipment with you on the day (Edesix camera and Time-Use Diary).

10

11

12

13

The video footage will be converted to images, and you will first view the images alone. You have the right to delete any (or all) of the images before the interview.

14

15

16

17

18

19

An interview (about 30-40 minute in length) will be conducted where the research team will ask you to describe your day, with assistance from the images. This interview will be audio recorded for future analysis, and you can terminate it at any point you want.

20

21

22

23

You will be asked to answer one (1) paper-based questionnaire about your experience during the study day (~10 minutes to answer).

24

25

### Your confidentiality

26

27

28

29

Any information or personal details gathered in the course of the study are confidential, except as required by law. No individual will be identified in any publication or presentation of the results.

30

31

32

33

34

35

Only members of the research team will have access of the data. None of your video or photo images will be released to the public. In cases when we need to use video or photo images in publications or presentations, we will seek your permission first, and images will be blurred such that no one is identifiable.

36

37

38

39

The study data will be kept for a minimum of 5 years from the most recent publication date and will be safely stored on a password-protected computer locked in the study centre.

40

41

42

43

44

45

46

By signing this form, you are also consenting to the potential use of this data in future research, however the Macquarie University Human Research Ethics Committee must first approve any such future research before any of your data is used. The results of the study will be published in peer-reviewed journals and may be presented at scientific conferences.

47

48

49

50

51

Participation in this study is entirely voluntary: you are not obliged to participate and if you decide to participate, you are free to withdraw at any time without having to give a reason and without consequence.

52

53

54

55

Your participation in this study will not affect your relationship with Macquarie University, nor the clinical care you receive at the MQ Health General Practice Unit.

**INVESTIGATOR/PARTICIPANT'S COPY**

I, \_\_\_\_\_ have read (*or, where appropriate, have had read to me*) and understand the information above and any questions I have asked were answered to my satisfaction. I agree to participate in this research, knowing that I can withdraw from further participation in the research at any time without consequence. I have been given a copy of this form to keep.

I **consent / do not consent** (*circle one*) for the research team to use my de-identified photos and video images in publications and presentations, provided that the persons in the images cannot be identified.

Participant's Name: \_\_\_\_\_  
(Block letters)

Participant's Signature: \_\_\_\_\_ Date: \_\_\_\_\_

Investigator's Name: \_\_\_\_\_  
(Block letters)

Investigator's Signature: \_\_\_\_\_ Date: \_\_\_\_\_

The ethical aspects of this study have been approved by the Macquarie University Human Research Ethics Committee. If you have any complaints or reservations about any ethical aspect of your participation in this research, you may contact the Committee through the Director, Research Ethics & Integrity (telephone (02) 9850 7854; email [ethics@mq.edu.au](mailto:ethics@mq.edu.au)). Any complaint you make will be treated in confidence and investigated, and you will be informed of the outcome.

## Pre-study interview questions

The pre-study interview will be conducted in the following steps:

1. The research team will explain the study to the participant.
2. The participant will read and sign the consent form.
3. The participant will be asked to complete a basic demographic survey (approximately 5 minutes).
4. The participant will be asked to complete the Multimorbidity Illness Perceptions Scale (approximately 10 minutes).
5. A semi-structured interview (approximately an hour) will be conducted with the participant regarding the health-related tasks they are engaged in. The interview will be audio recorded to allow for analysis.
6. With the participant's permission, the research team will take photographs of the participant's current medications, medical devices, and their surroundings.
7. The participant will be instructed to the use of the Edesix body camera and the Time-Use Diary.
8. The participant will also receive an instruction card to explain what the study is about if members of the public enquire about it.

### Life History

Examples:

- How was your health as a child or a young person?
- How was the health of your family?
- How have your health conditions affected your job?

### Social Life & Mental Health

Examples:

- Has your health ever affected your interactions with your friends?
- How do you feel about the impact (or lack of) your health had on your social life?
- Can you tell me a bit about your mental journey when you were diagnosed / started on this treatment?
- Do you feel differently towards your health conditions and meds now than you did before?

### Physical Health & Medical History

Examples:

- What health conditions do you have?
- What medications do you take? And how often?
- Do you know much about your health conditions?
- Did you go research on your medications/conditions yourself?
- What kind of food do you have to watch out for due to your health?
- With your level of mobility, how do you find exercise?

1  
2  
3 Physical Environment  
4

5 Examples:

- 6
- 7 • How do you find going up and down the stairs?
  - 8 • Who does your cooking/laundry/gardening?
- 9

10  
11 Organisational efforts & Attitude  
12

13 Examples:

- 14
- 15 • Do you have domestic help? Paid or unpaid?
  - 16 • Has the physical layout of your house / any other place affected your ability to take care of
  - 17 yourself?
  - 18 • What are your opinions about your medications and your doctors?
- 19  
20  
21  
22  
23  
24  
25  
26  
27  
28  
29  
30  
31  
32  
33  
34  
35  
36  
37  
38  
39  
40  
41  
42  
43  
44  
45  
46  
47  
48  
49  
50  
51  
52  
53  
54  
55  
56  
57  
58  
59  
60

## Post-study interview questions

The post-study interview will be conducted in the following steps:

1. The participant will return the Edesix body camera and Time-Use Diary.
2. Data from the body camera will be downloaded to a secure computer.
3. The video from the body camera will be converted into screenshots, with one screenshot taken for every 10 seconds of video footage.
4. After video download and screenshot conversion, the videos will be deleted, and the participant will view the screenshots alone, and has the right to delete any or all the images.
5. The research team will conduct a 30 – 40 minutes interview with the participant, where he/she will describe the study day, with the assistance of the images and the Time-Use Diary, focusing on any specific health-related activities (e.g. Cooking, exercising, social activities).
6. The interview will be audio recorded to allow for thematic analysis.
7. The researchers may also ask participants to clarify the activity in any screenshots that may appear ambiguous (e.g. ceiling images may imply napping on the sofa).
8. The researchers will also check that the time-stamp on the screenshots match the activities reported in the Time-Use Diary (if not, annotate the Time-Use Diary or ask participant questions for clarification).
9. The participants will complete the Participant Experience Survey, and give feedback regarding the study.
10. The participant will be remunerated with a \$60 Westfield shopping voucher for their assistance.

Questions for the semi-structured interview:

Examples

- Tell us about your day.
- Was this a typical day? If not, what was different on this day?
- What time did you start / stop filling in the Time-Use Diary?
- What time did you start / stop video recording?
- Around what time did you wake up and go to bed last night?
- How did you sleep during the study night?
- Do you always do [activity] at this time of the day?
- Is this the kinds of food you usually eat for breakfast/lunch/dinner?
- You spent a long time doing [activity] yesterday. Is this how long you usually take to do [activity]?
- Do you always do [activity] at [location]?
- Are there changes you would like to make to your daily routine?
