# Supplementary material for: Patient work from a context and time use perspective: a mixed-methods study protocol
Source: PubMed Central journal article supplement — BMJ Open. 2018 Dec 22;8(12):e022163. doi: 10.1136/bmjopen-2018-022163 (PMC6307620; doi:10.1136/bmjopen-2018-022163), 2018-12-22
Supplement: bmjopen-2018-022163supp003.pdf [file bmjopen-2018-022163supp003.pdf]

## Participant Information Questionnaire

**Date:** \_\_\_\_\_

**\*Email:** \_\_\_\_\_

**Date of Birth:** \_\_\_\_\_ **Sex** : \_\_\_\_\_

**Health conditions:** \_\_\_\_\_

**List of medications being taken:** \_\_\_\_\_

\_\_\_\_\_

\_\_\_\_\_

\_\_\_\_\_

**Length of time since diagnosis:** \_\_\_\_\_

**What is your employment status?**

- |                                                                                               |                                                   |
|-----------------------------------------------------------------------------------------------|---------------------------------------------------|
| <input type="checkbox"/> In paid employment                                                   | <input type="checkbox"/> Unpaid work experience   |
| <input type="checkbox"/> Full-time student                                                    | <input type="checkbox"/> Retired                  |
| <input type="checkbox"/> Unemployed (not on leave)                                            | <input type="checkbox"/> On parental leave        |
| <input type="checkbox"/> Doing domestic work (homemaking,<br>looking after the children etc.) | <input type="checkbox"/> Other (specify)<br>_____ |

**Would you like to be contacted to receive feedback on the study?**

Yes  No

**Would you like to be contacted for future research?**

Yes  No

**\*Please note, all of the information in this questionnaire, including contact information, will only be used for research purposes and will not be passed on to third parties.**
