# Supplementary material for: Patient work from a context and time use perspective: a mixed-methods study protocol
Source: PubMed Central journal article supplement — BMJ Open. 2018 Dec 22;8(12):e022163. doi: 10.1136/bmjopen-2018-022163 (PMC6307620; doi:10.1136/bmjopen-2018-022163), 2018-12-22
Supplement: bmjopen-2018-022163supp004.pdf [file bmjopen-2018-022163supp004.pdf]

### The Multimorbidity Illness Perceptions Scale (MULTIPLEs)

These questions are about the thoughts and feelings that people with multiple long-term conditions sometimes experience. Please indicate how much you agree with each statement by circling one number.

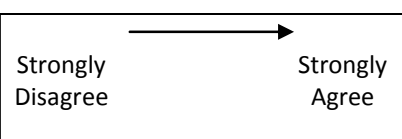

|    |                                                                                                |   |   |   |   |
|----|------------------------------------------------------------------------------------------------|---|---|---|---|
| 1  | One of my conditions is more serious than the others.                                          | 0 | 1 | 2 | 3 |
| 2  | Time spent managing my conditions has made it more difficult to carry out my usual activities. | 0 | 1 | 2 | 3 |
| 3  | I feel so overwhelmed by the treatment for one condition it is hard to manage any others.      | 0 | 1 | 2 | 3 |
| 4  | The causes of my conditions are linked.                                                        | 0 | 1 | 2 | 3 |
| 5  | It is difficult to take all my medications the way I am supposed to.                           | 0 | 1 | 2 | 3 |
| 6  | Time spent managing my condition has limited my activities.                                    | 0 | 1 | 2 | 3 |
| 7  | One of my conditions is more worrying than the others.                                         | 0 | 1 | 2 | 3 |
| 8  | Taking different medications for each of my conditions has caused me problems.                 | 0 | 1 | 2 | 3 |
| 9  | I don't like mixing medications for different conditions.                                      | 0 | 1 | 2 | 3 |
| 10 | Having more than one condition makes my treatments less effective.                             | 0 | 1 | 2 | 3 |
| 11 | One of my conditions has caused another.                                                       | 0 | 1 | 2 | 3 |
| 12 | One of my conditions dominates the others.                                                     | 0 | 1 | 2 | 3 |
| 13 | My conditions interact with each other.                                                        | 0 | 1 | 2 | 3 |
| 14 | Having more than one condition makes it difficult to get the best available treatment.         | 0 | 1 | 2 | 3 |
| 15 | Time spent managing my conditions has reduced my social life.                                  | 0 | 1 | 2 | 3 |
| 16 | One of my conditions has more of an impact on my life.                                         | 0 | 1 | 2 | 3 |

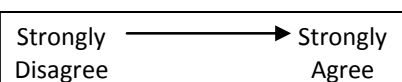

|    |                                                                   |   |   |   |   |   |   |
|----|-------------------------------------------------------------------|---|---|---|---|---|---|
| 17 | Having more than one condition makes me unhappy.                  | 0 | 1 | 2 | 3 | 4 | 5 |
| 18 | Having more than one condition makes me more anxious.             | 0 | 1 | 2 | 3 | 4 | 5 |
| 19 | Having more than one condition makes me angry or frustrated.      | 0 | 1 | 2 | 3 | 4 | 5 |
| 20 | Having more than one health problem makes me feel sad.            | 0 | 1 | 2 | 3 | 4 | 5 |
| 21 | Having more than one condition makes me more irritable.           | 0 | 1 | 2 | 3 | 4 | 5 |
| 22 | If I feel sad or depressed, managing my conditions is a struggle. | 0 | 1 | 2 | 3 | 4 | 5 |
