# Supplementary material for: Patient work from a context and time use perspective: a mixed-methods study protocol
Source: PubMed Central journal article supplement — BMJ Open. 2018 Dec 22;8(12):e022163. doi: 10.1136/bmjopen-2018-022163 (PMC6307620; doi:10.1136/bmjopen-2018-022163), 2018-12-22
Supplement: bmjopen-2018-022163supp005.pdf [file bmjopen-2018-022163supp005.pdf]

## PARTICIPANT EXPERIENCE SURVEY

### EDESIX BODY CAMERA

| <b><i>Did you experience any of the following problems while you were wearing the camera?</i></b> |       |            |       |        |
|---------------------------------------------------------------------------------------------------|-------|------------|-------|--------|
|                                                                                                   | Never | Some-times | Often | Always |
| Forgetting to wear the camera                                                                     |       |            |       |        |
| People's reaction to me wearing the camera                                                        |       |            |       |        |
| Discomfort wearing the camera                                                                     |       |            |       |        |
| Problems with the camera slipping/moving about                                                    |       |            |       |        |
| Difficulty understanding the camera instructions                                                  |       |            |       |        |
| Frustration with the length of time I had to wear the camera                                      |       |            |       |        |
| Being uncertain about whether the camera was turned on                                            |       |            |       |        |

Do you have any additional comments about your experience of wearing the camera?

---



---



---



---

## TIME USE DIARY

| <b><i>Did you experience any of these problems when completing the diary?</i></b> |       |            |       |        |
|-----------------------------------------------------------------------------------|-------|------------|-------|--------|
|                                                                                   | Never | Some-times | Often | Always |
| Remembering to fill in the diary                                                  |       |            |       |        |
| Forgetting what I did during the day/evening                                      |       |            |       |        |
| The length of time it took to complete the diary                                  |       |            |       |        |
| Completing all sections of the diary                                              |       |            |       |        |
| Understanding the diary instructions                                              |       |            |       |        |

Do you have any additional comments about your experience of completing the time use diary?

---



---



---



---

## **PARTICIPATING IN THE STUDY**

Were there any aspects of the study that you particularly enjoyed?

---

---

Were there any aspects of the study that you disliked?

---

---

How did you find the 'reconstruction interview' experience?

---

---

What motivated you to participate in the study?

---

---

Do you have any other comments or suggestions?

---

---

---
