# Supplementary material for: Patient work from a context and time use perspective: a mixed-methods study protocol
Source: PubMed Central journal article supplement — BMJ Open. 2018 Dec 22;8(12):e022163. doi: 10.1136/bmjopen-2018-022163 (PMC6307620; doi:10.1136/bmjopen-2018-022163), 2018-12-22
Supplement: bmjopen-2018-022163supp007.pdf [file bmjopen-2018-022163supp007.pdf]

## Pre-study interview questions

The pre-study interview will be conducted in the following steps:

1. The research team will explain the study to the participant.
2. The participant will read and sign the consent form.
3. The participant will be asked to complete a basic demographic survey (approximately 5 minutes).
4. The participant will be asked to complete the Multimorbidity Illness Perceptions Scale (approximately 10 minutes).
5. A semi-structured interview (approximately an hour) will be conducted with the participant regarding the health-related tasks they are engaged in. The interview will be audio recorded to allow for analysis.
6. With the participant's permission, the research team will take photographs of the participant's current medications, medical devices, and their surroundings.
7. The participant will be instructed to the use of the Edesix body camera and the Time-Use Diary.
8. The participant will also receive an instruction card to explain what the study is about if members of the public enquire about it.

### Life History

Examples:

- How was your health as a child or a young person?
- How was the health of your family?
- How have your health conditions affected your job?

### Social Life & Mental Health

Examples:

- Has your health ever affected your interactions with your friends?
- How do you feel about the impact (or lack of) your health had on your social life?
- Can you tell me a bit about your mental journey when you were diagnosed / started on this treatment?
- Do you feel differently towards your health conditions and meds now than you did before?

### Physical Health & Medical History

Examples:

- What health conditions do you have?
- What medications do you take? And how often?
- Do you know much about your health conditions?
- Did you go research on your medications/conditions yourself?
- What kind of food do you have to watch out for due to your health?
- With your level of mobility, how do you find exercise?

## Physical Environment

Examples:

- How do you find going up and down the stairs?
- Who does your cooking/laundry/gardening?

## Organisational efforts & Attitude

Examples:

- Do you have domestic help? Paid or unpaid?
- Has the physical layout of your house / any other place affected your ability to take care of yourself?
- What are your opinions about your medications and your doctors?
